# Supplementary material
Source: MDPI journal article supplement (https://www.mdpi.com/2624-8549/5/2/81)
Supplement: s1 [file s1]

## Supporting Information

### **A pathway for aldol additions catalyzed by L-Hydroxyproline-peptides via a $\beta$ -hydroxyketone hemiaminal intermediate**

**Lo'ay Ahmed Al-Momani <sup>1,\*</sup>, Heinrich Lang <sup>2</sup> and Steffen Lüdeke <sup>3,4,\*</sup>**

<sup>1</sup> Department of Chemistry, Faculty of Science, The Hashemite University, Zarqa 13133, Jordan

<sup>2</sup> Research Center for Materials, Architectures and Integration of Nanomembranes (MAIN),  
Research Group Organometallic Chemistry, Technische Universität Chemnitz,  
Rosenbergstraße 6, D-09126 Chemnitz, Germany; heinrich.lang@chemie.tu-chemnitz.de

<sup>3</sup> Institute of Pharmaceutical Sciences, Albert-Ludwigs-Universität Freiburg,  
Albertstraße 25, 79104 Freiburg, Germany

<sup>4</sup> Institute of Pharmaceutical and Biomedical Sciences (IPBS),  
Johannes Gutenberg-Universität Mainz, Staudingerweg 5, 55128 Mainz, Germany

\* Correspondence: loay.al-momani@hu.edu.jo (L.A.M.); sluedeke@uni-mainz.de (S.L.)

## Content

|                                                                                                            |     |
|------------------------------------------------------------------------------------------------------------|-----|
| Supplementary Computational Data .....                                                                     | S3  |
| Analytical Data .....                                                                                      | S4  |
| Chiral Phase HPLC Data.....                                                                                | S20 |
| Model Geometries from DFT Calculations.....                                                                | S25 |
| Aldol Reaction Cycle with <i>cis</i> -4-Hydroxy-L-proline ( <i>cis</i> - <b>2</b> ) as a Catalyst .....    | S25 |
| Aldol Reaction Cycle with <i>trans</i> -4-Hydroxy-L-proline ( <i>trans</i> - <b>2</b> ) as a Catalyst..... | S29 |
| Aldol Reaction Cycle with <i>cis</i> -4-Hyp-Gly-OBn ( <i>cis</i> - <b>6</b> ) as a Catalyst.....           | S33 |
| Aldol Reaction Cycle with <i>trans</i> -4-Hyp-Gly-OBn ( <i>trans</i> - <b>6</b> ) as a Catalyst .....      | S39 |
| Partial Aldol Reaction Cycle with <i>cis</i> -4-Hyp-NHMe ( <i>cis</i> - <b>12</b> ) as a Catalyst .....    | S45 |
| Partial Aldol Reaction Cycle with <i>trans</i> -4-Hyp-NHMe ( <i>trans</i> - <b>12</b> ) as a Catalyst..... | S50 |

## Supplementary Computational Data

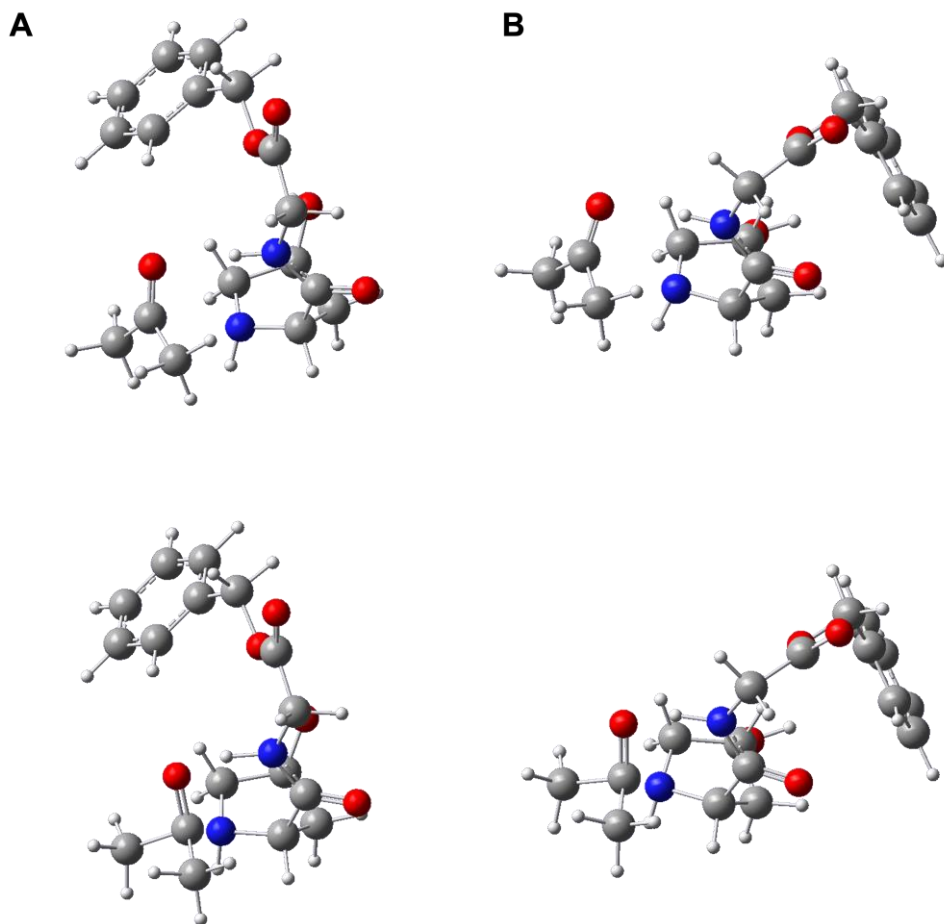

**Figure S1.** Displacement of atoms in the vibrations associated with the imaginary frequencies calculated at the B3LYP/6-31G(d) level for TS1 (formation of a hemiaminal from catalyst and acetone) with transition structures modeled as in Figure 5A (analogous to catalytic cycles with free amino acids). A: TS1 with a conformer of *cis*-6. B: TS1 with a conformer of *trans*-6. The top and bottom figures represent two snapshots from the vibration (visualized with GaussView). The displacement of the atoms indicates formation of an N–C bond in TS1, but no displacement of the amide hydrogen atom associated with hydrogen transfer to the carbonyl oxygen of acetone.

# Analytical Data

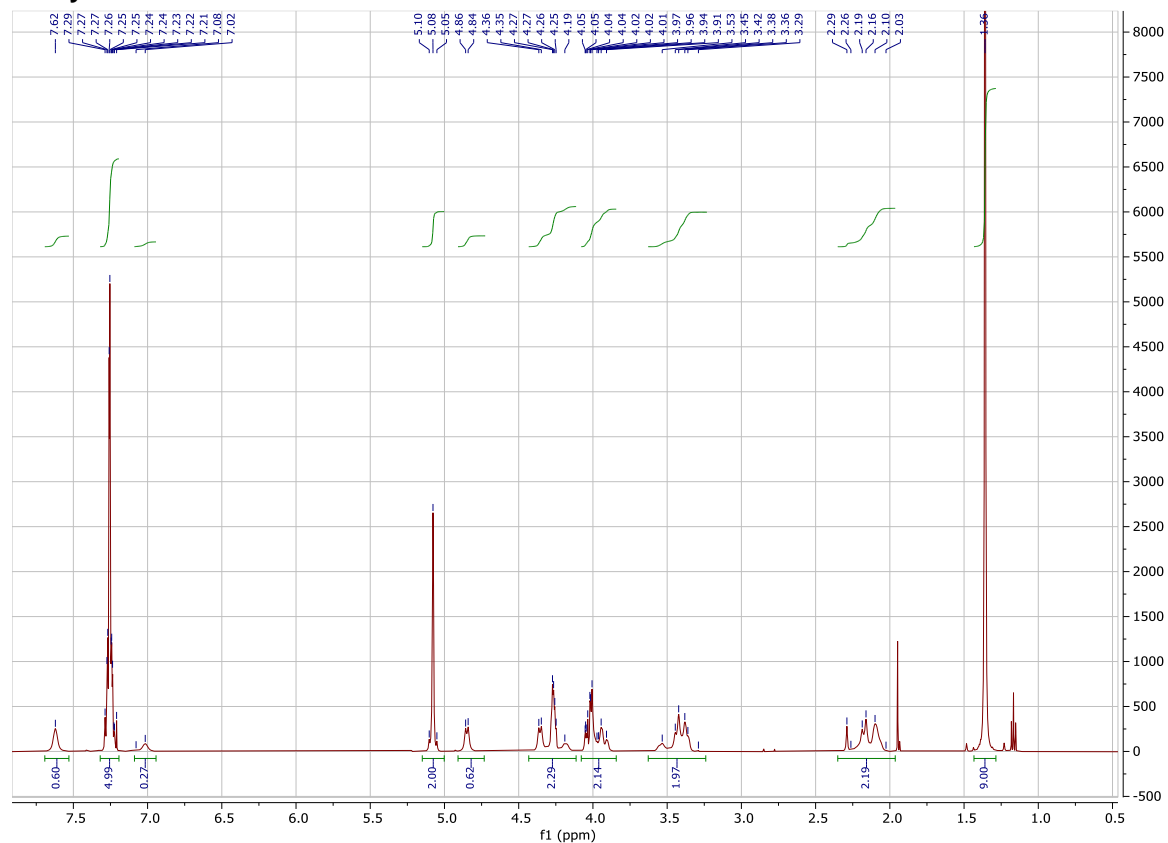

Figure S2. <sup>1</sup>H-NMR of *cis*-4 in CDCl<sub>3</sub>.

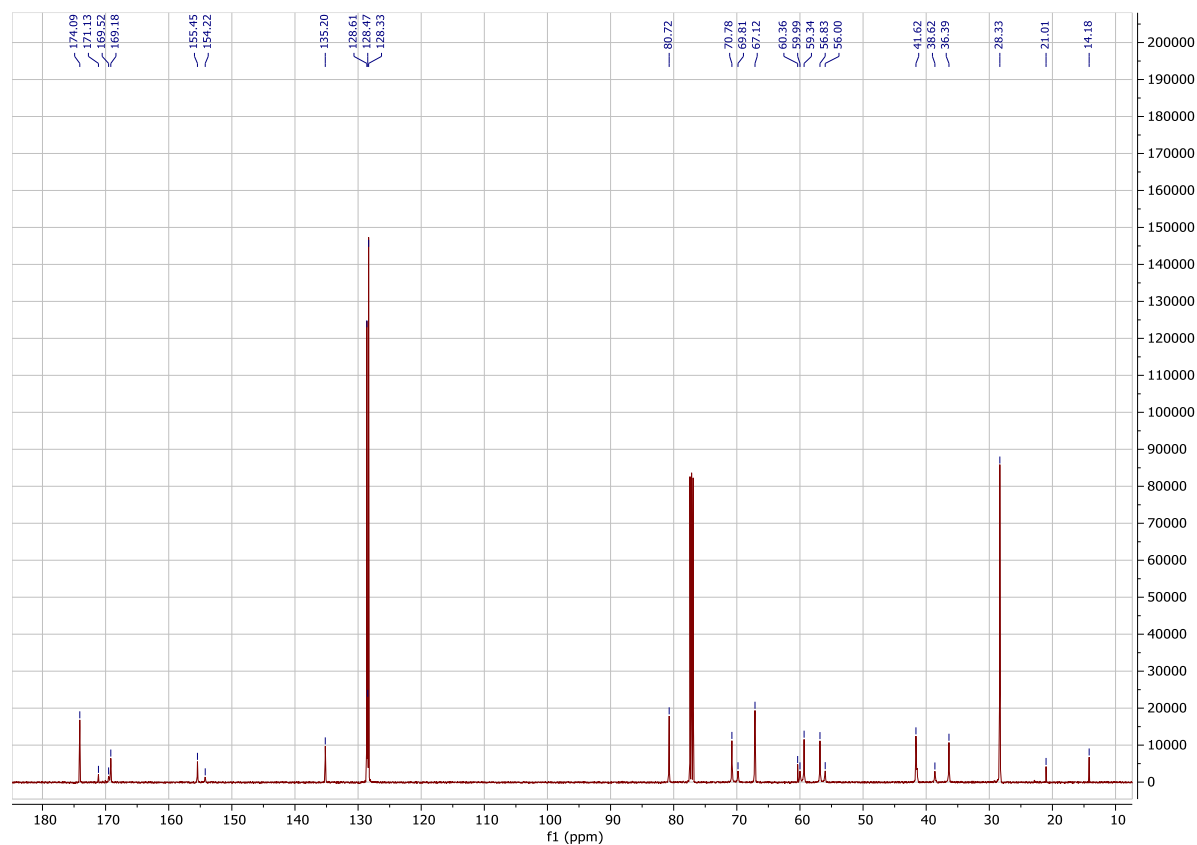

Figure S3. <sup>13</sup>C-NMR of *cis*-4 in CDCl<sub>3</sub>.

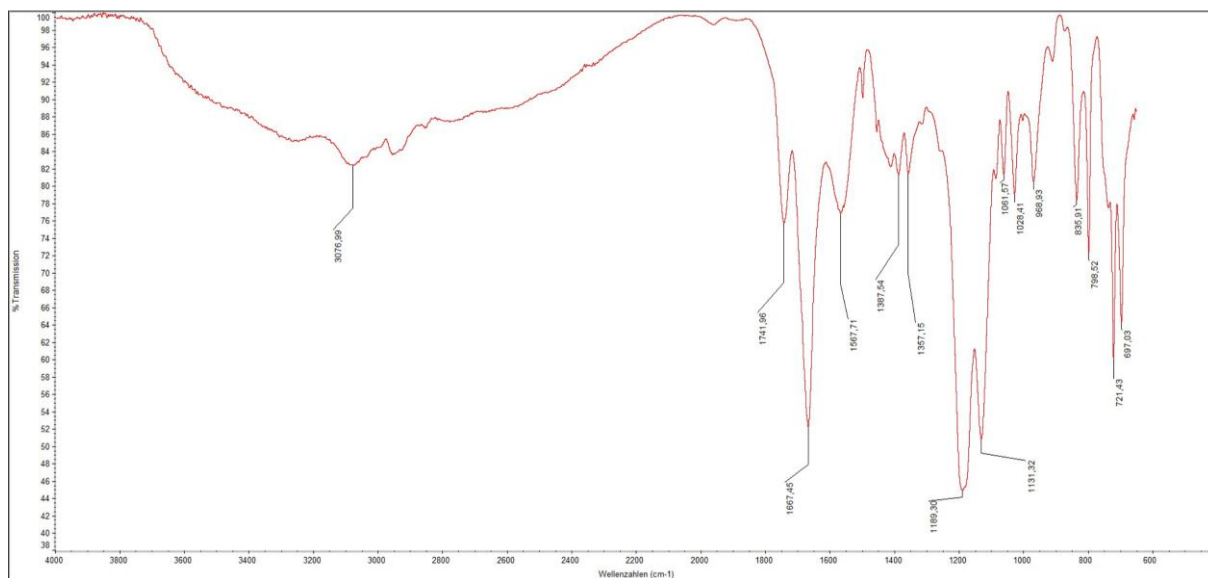

**Figure S4.** Neat IR of *cis*-4.

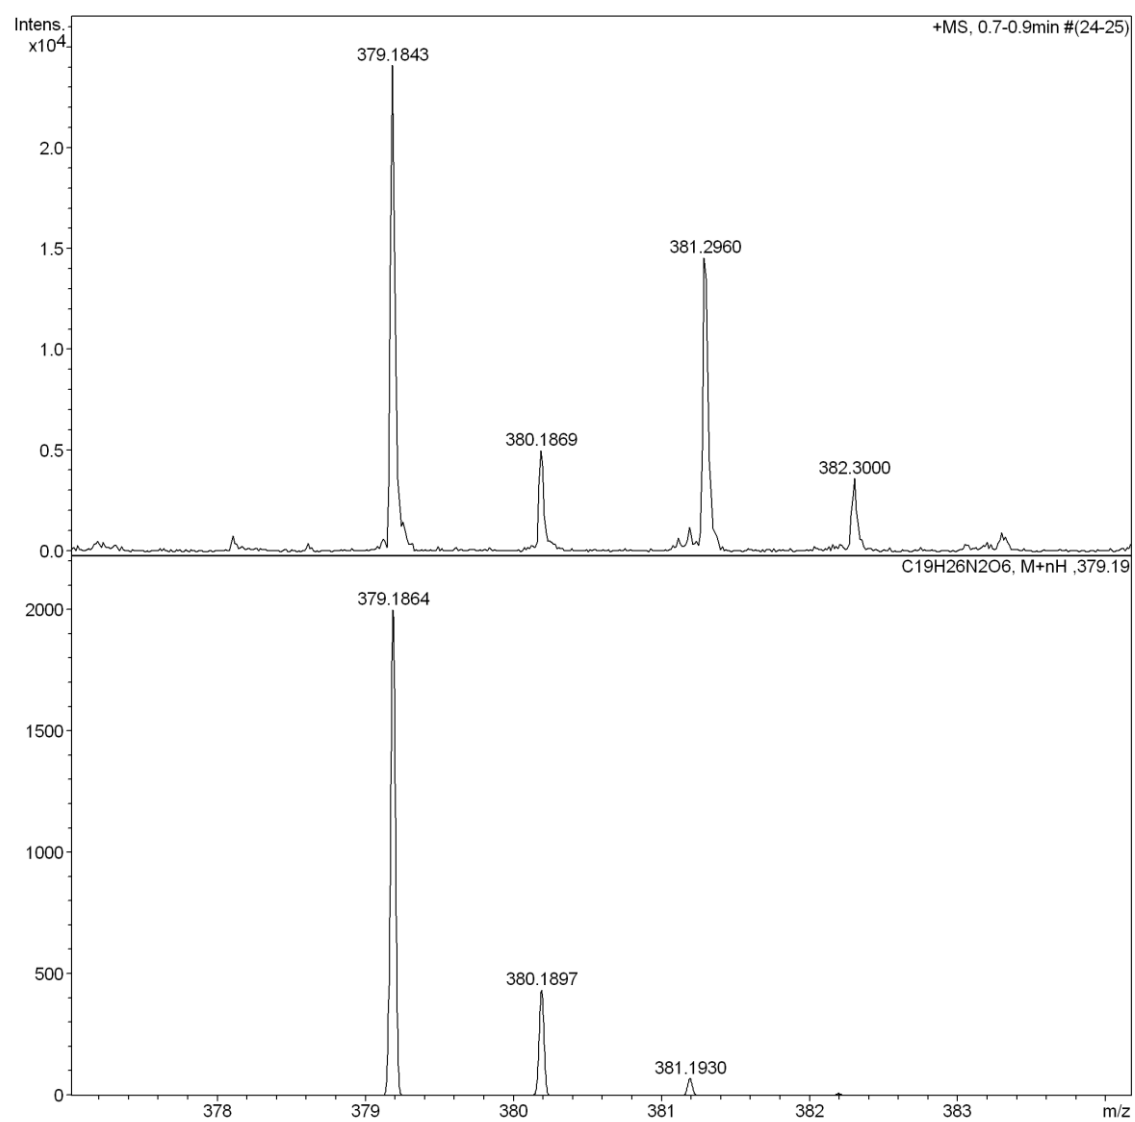

**Figure S5.** ESI-MS of *cis*-4.

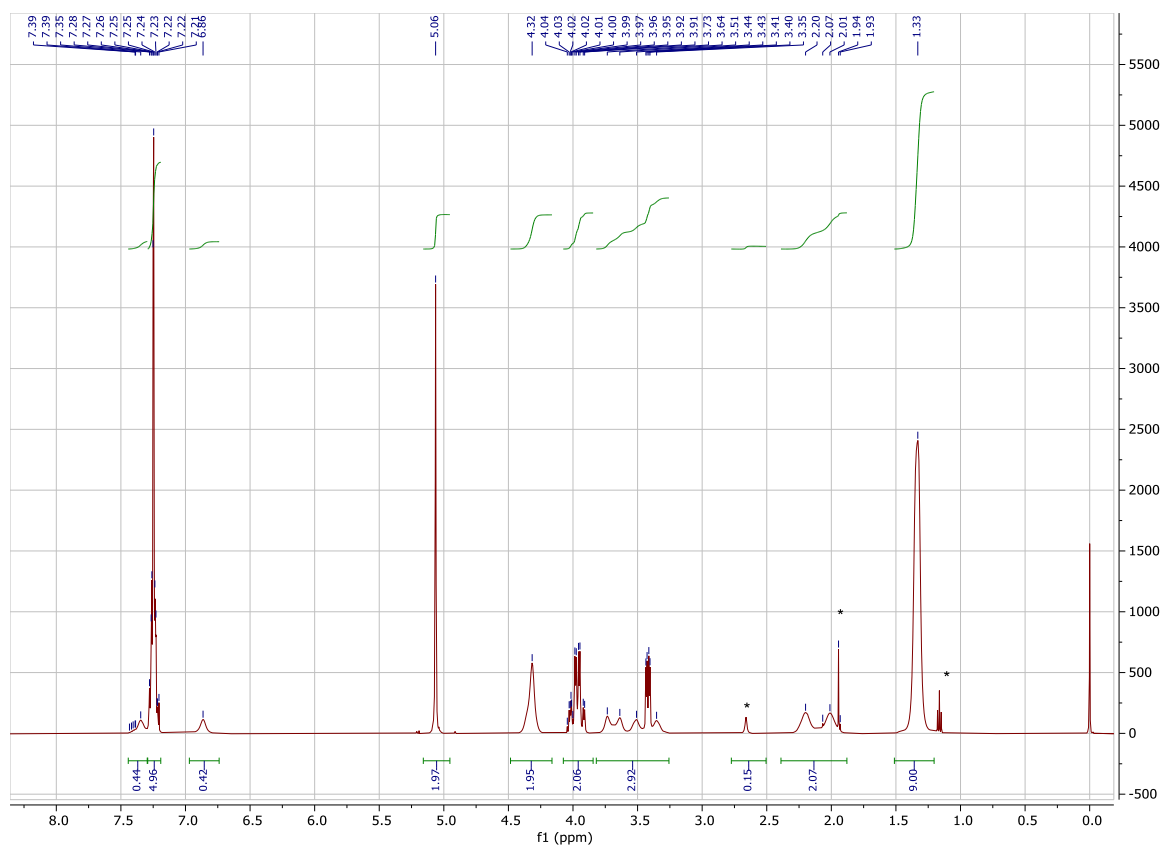

**Figure S6.**  $^1\text{H}$ -NMR of *trans*-4 in  $\text{CDCl}_3$  (signals due to solvent impurities marked with asterisks \*).

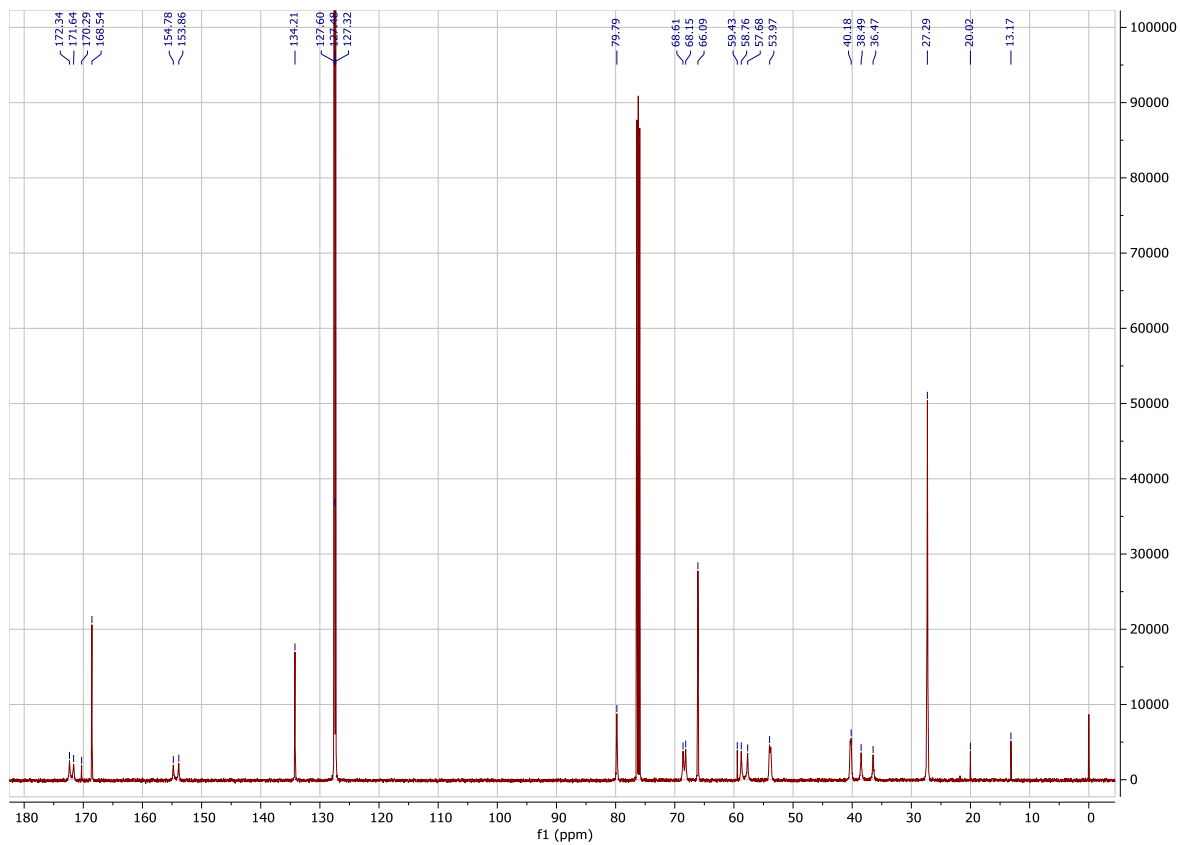

**Figure S7.**  $^{13}\text{C}$ -NMR of *trans*-4 in  $\text{CDCl}_3$ .

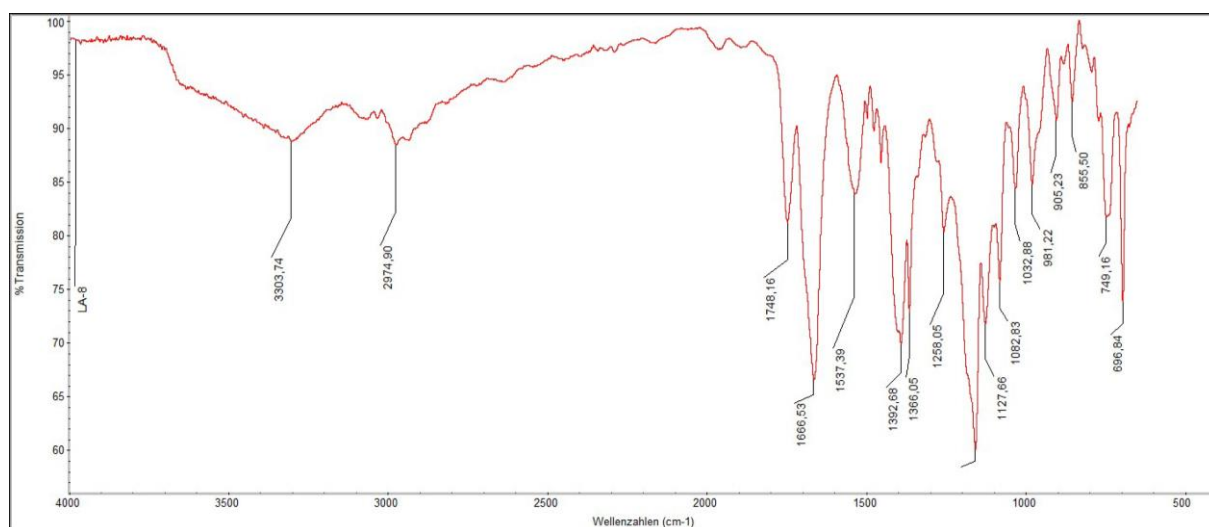

**Figure S8.** Neat IR of *trans*-4.

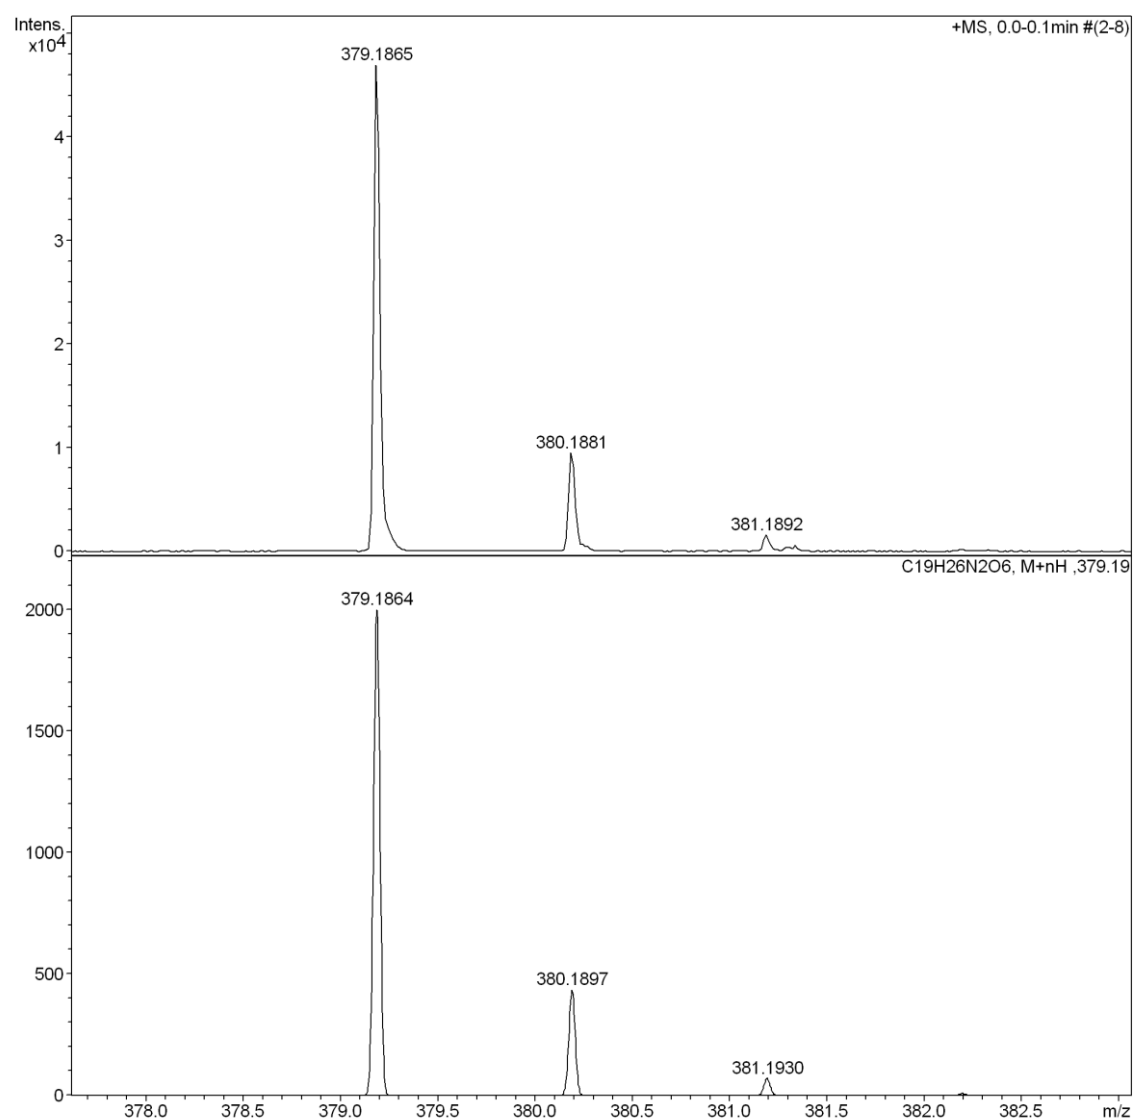

**Figure S9.** ESI-MS of *trans*-4.

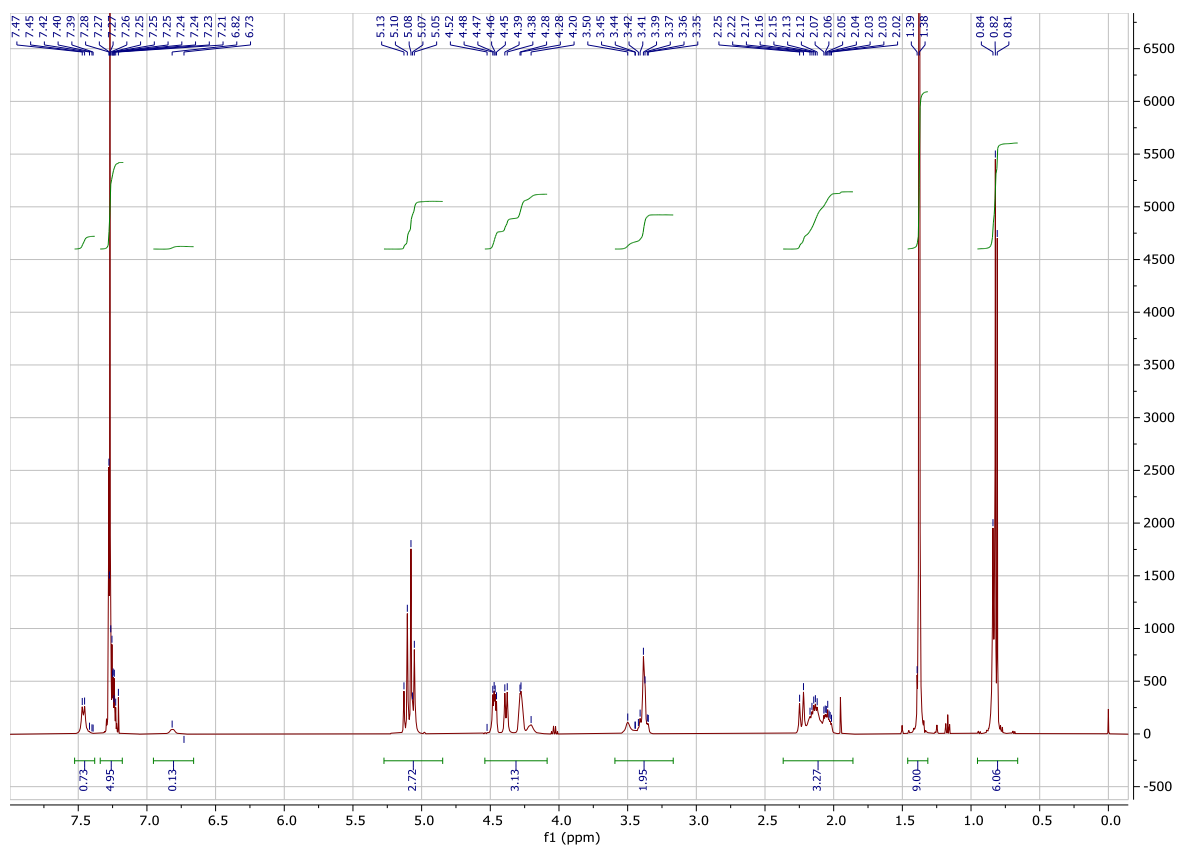

**Figure S10.** <sup>1</sup>H-NMR of *cis*-5 in CDCl<sub>3</sub>.

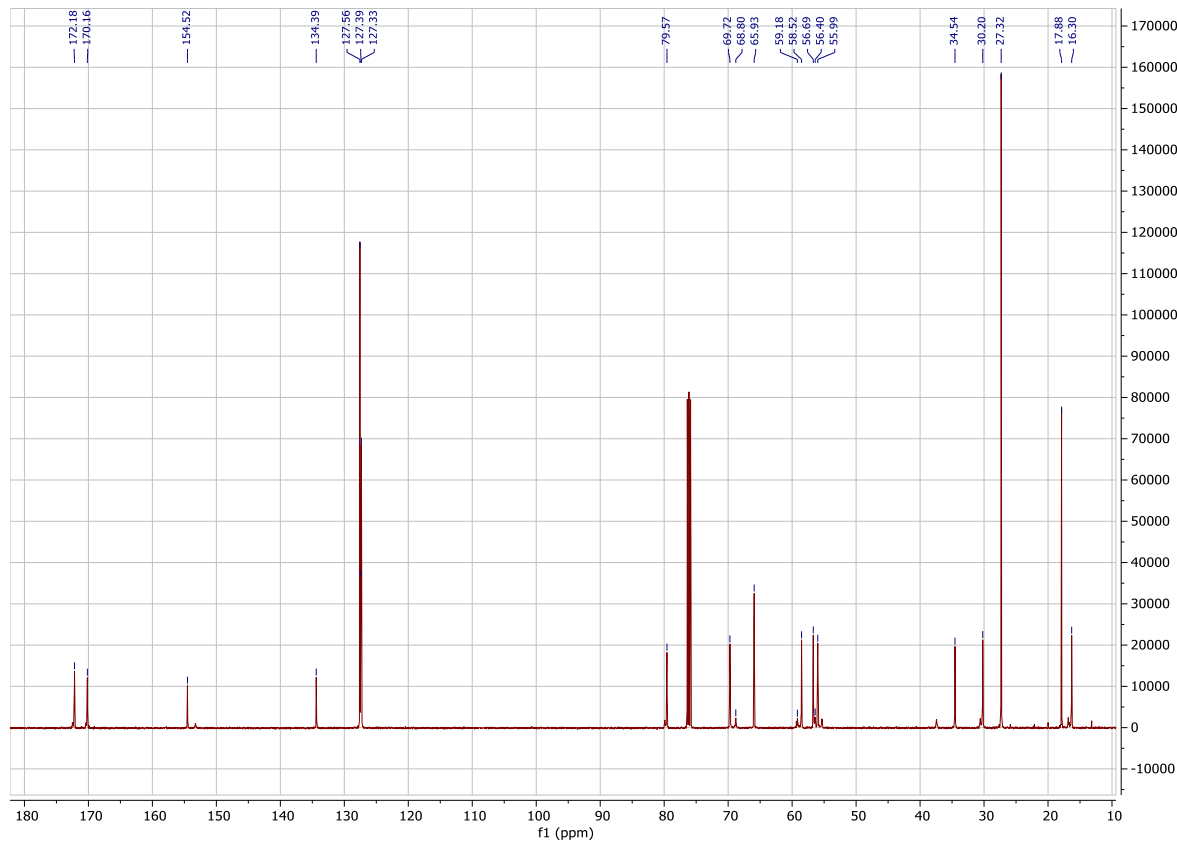

**Figure S11.** <sup>13</sup>C-NMR of *cis*-5 in CDCl<sub>3</sub>.



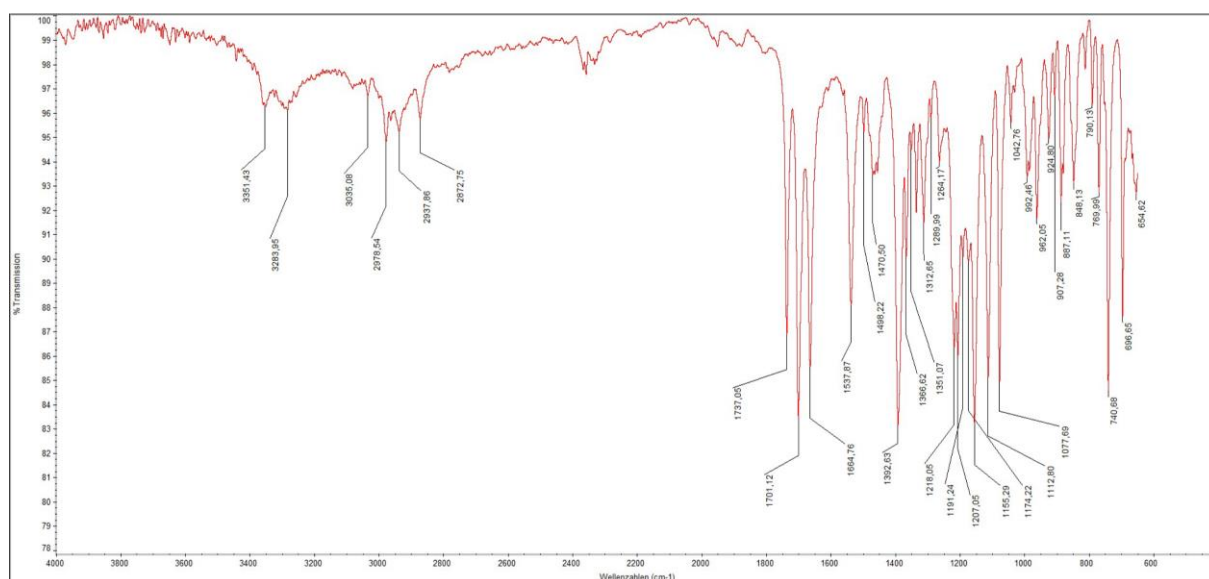

**Figure S12.** Neat IR of *cis*-5.

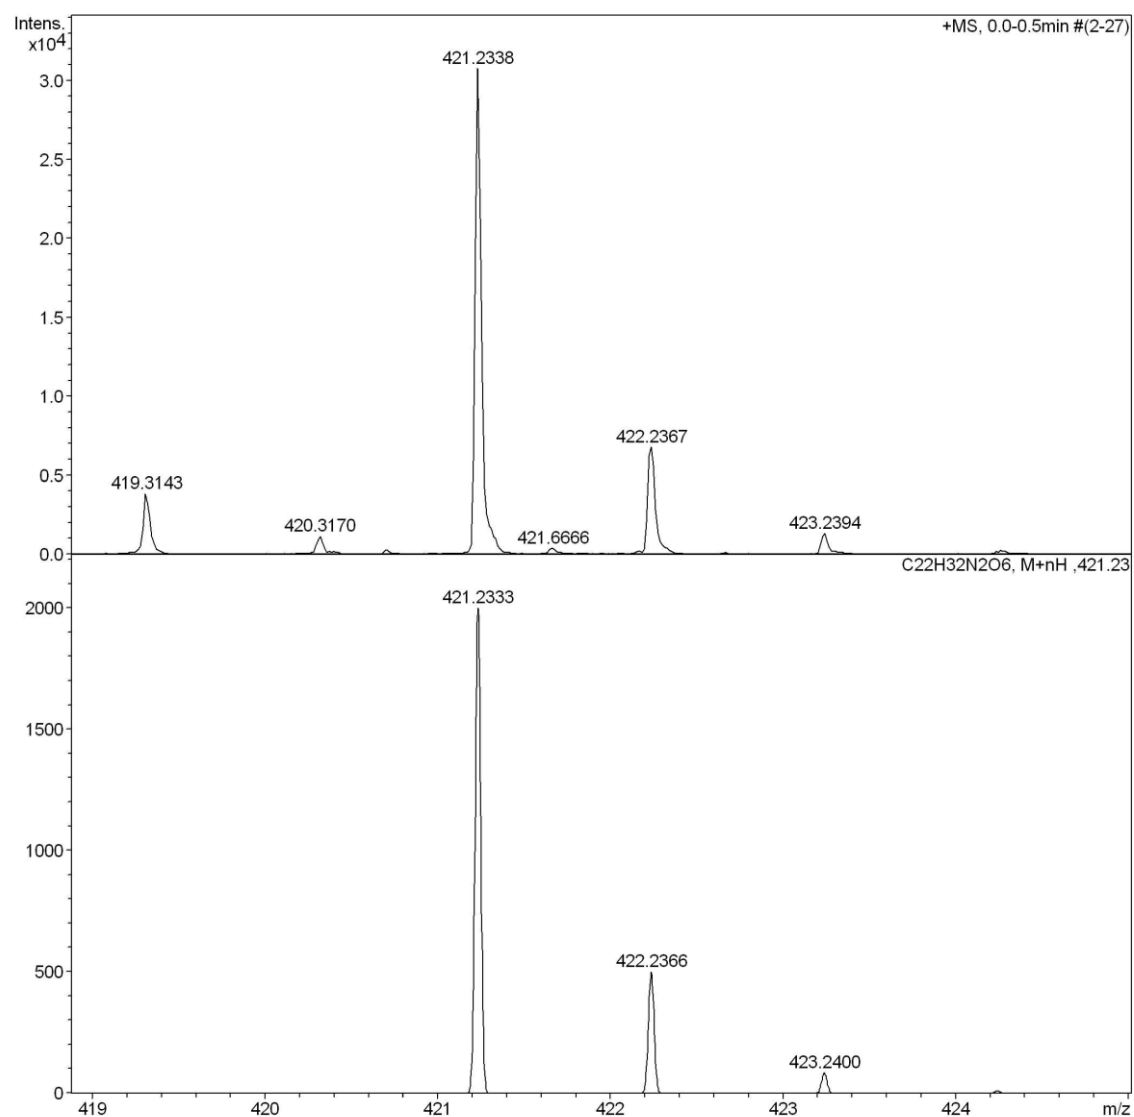

**Figure S13.** ESI-MS of *cis*-5.

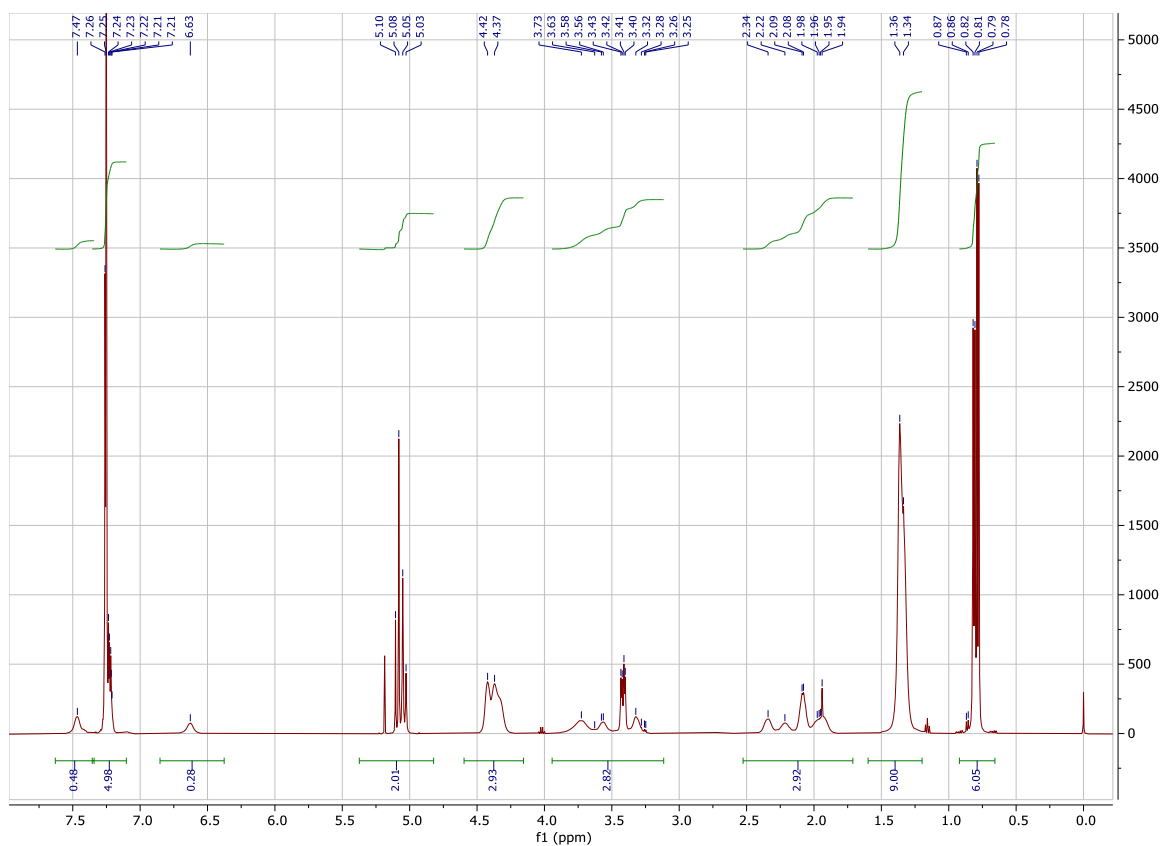

**Figure S14.** <sup>1</sup>H-NMR of *trans*-5 in CDCl<sub>3</sub>.

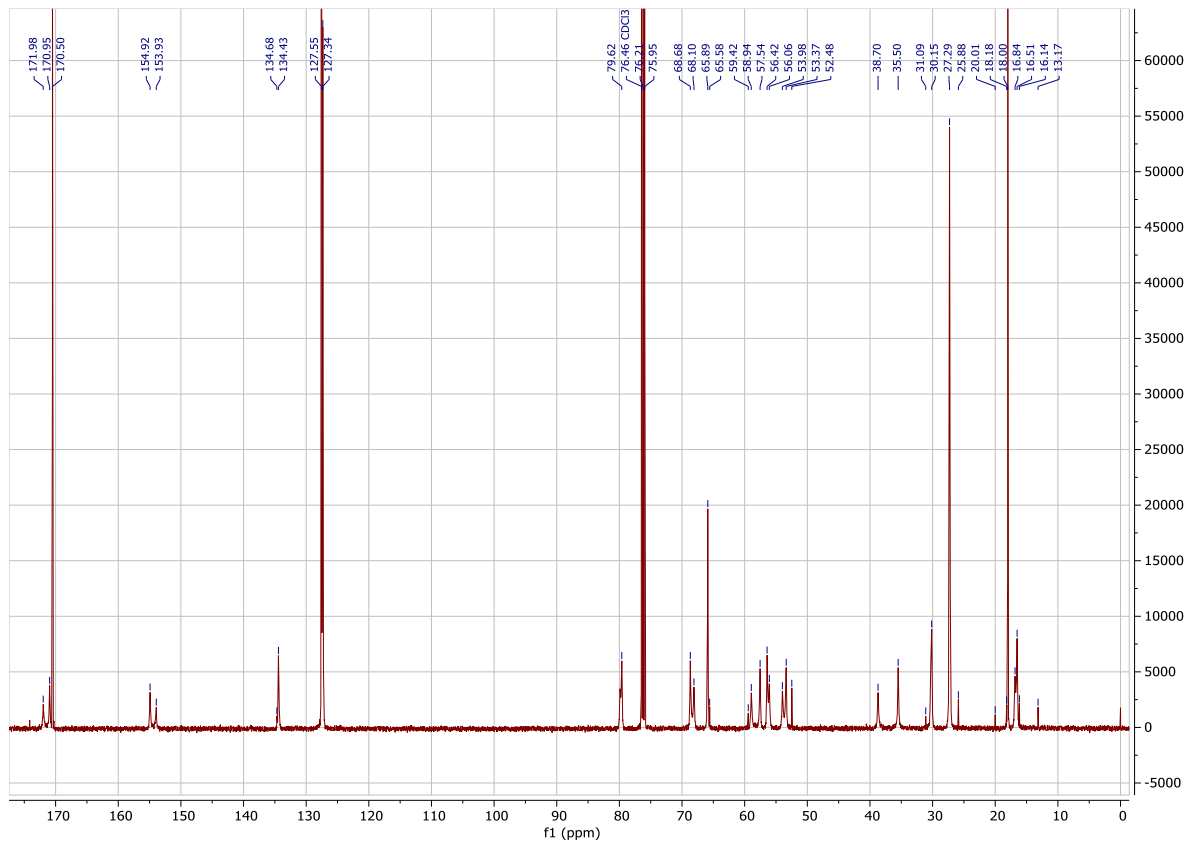

**Figure S15.** <sup>13</sup>C-NMR of *trans*-5 in CDCl<sub>3</sub>.

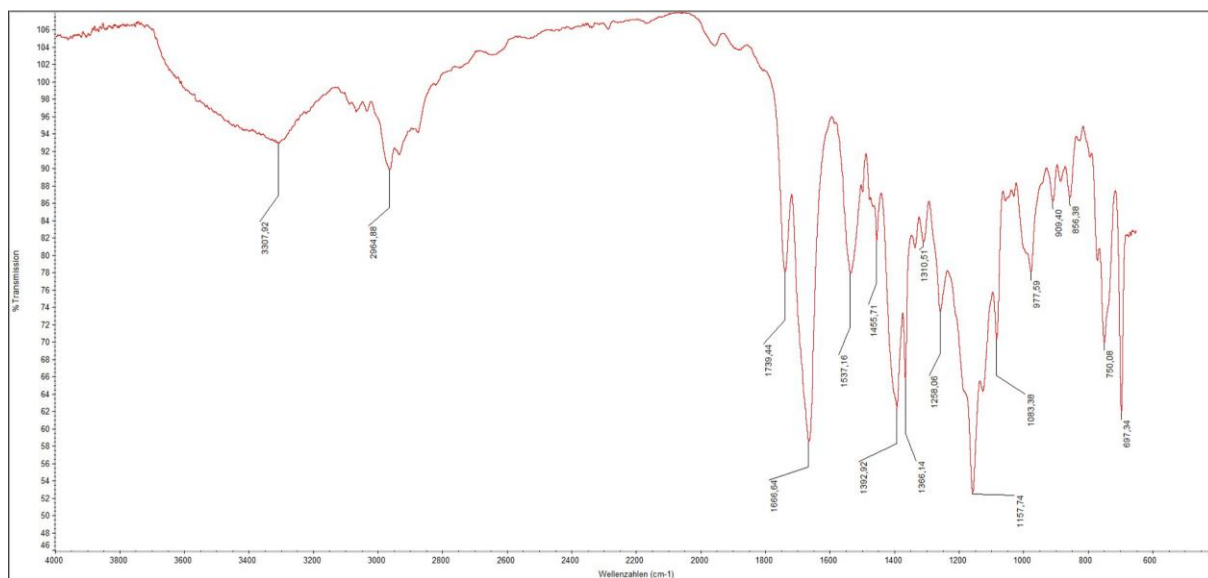

Figure S16. Neat IR of *trans*-5.

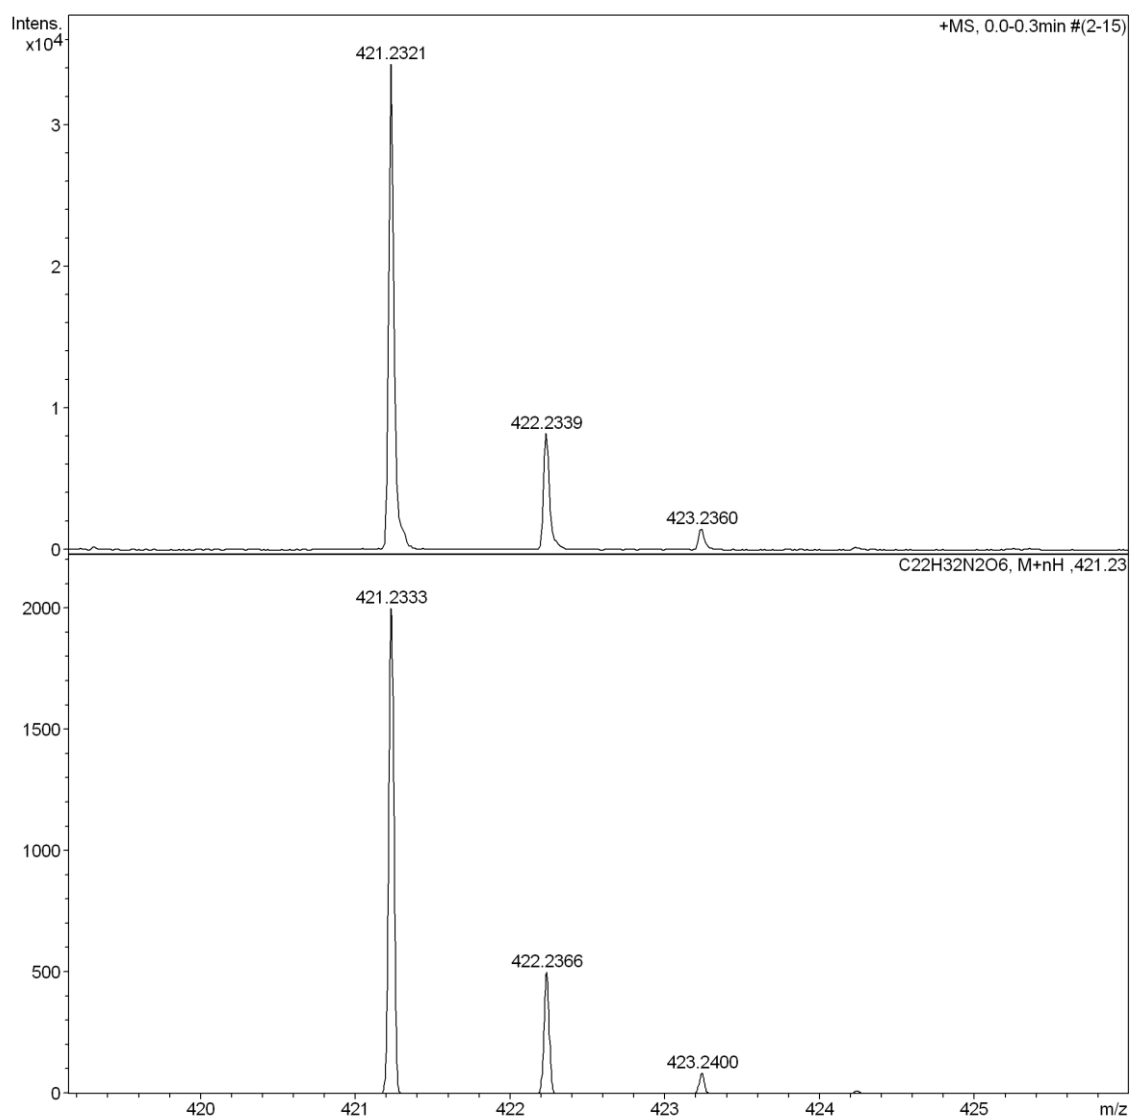

Figure S17. ESI-MS of *trans*-5.

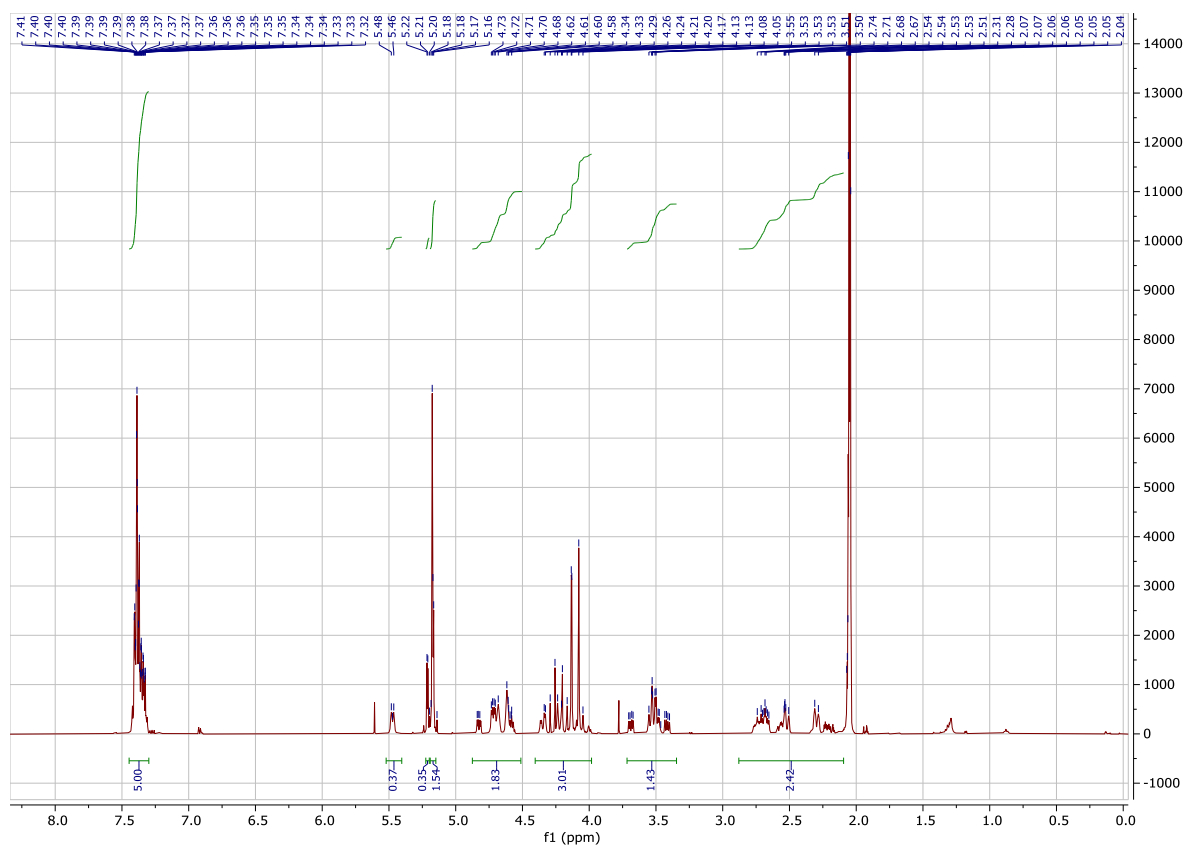

**Figure S18.**  $^1\text{H}$ -NMR of *cis*-**6** in  $\text{CDCl}_3$ .

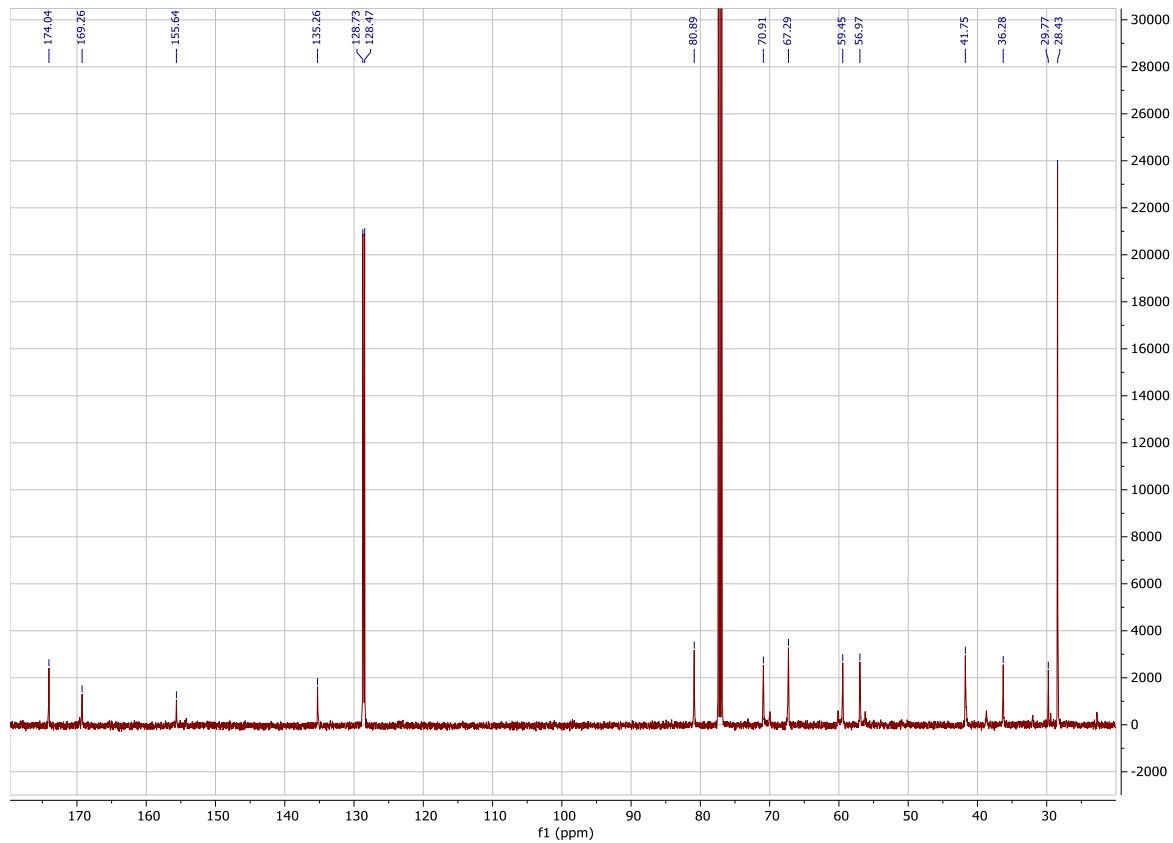

**Figure S19.**  $^{13}\text{C}$ -NMR of *cis*-**6** in  $\text{CDCl}_3$ .

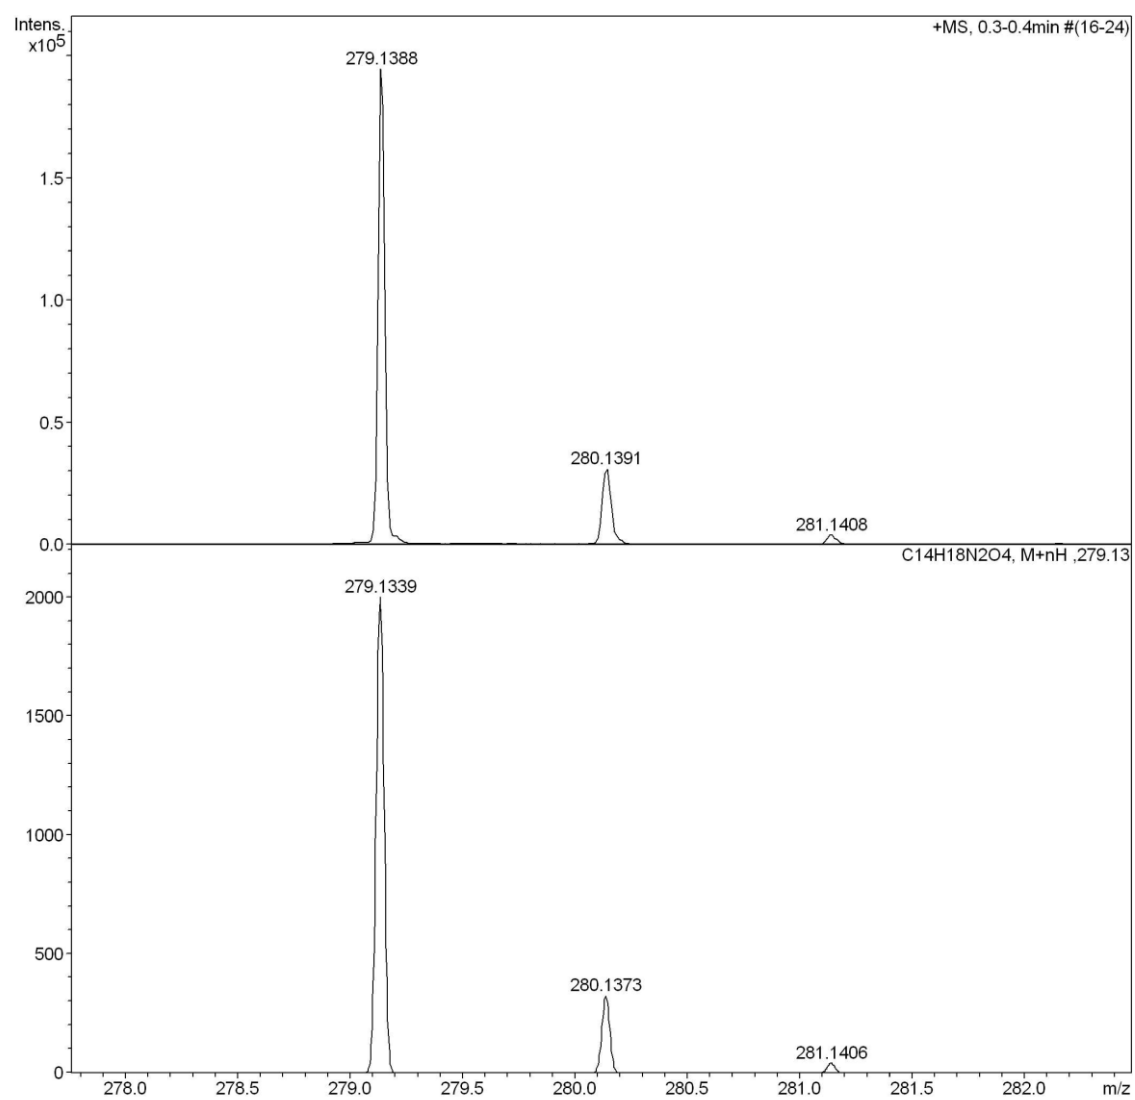

**Figure S20.** ESI-MS of *cis*-6.

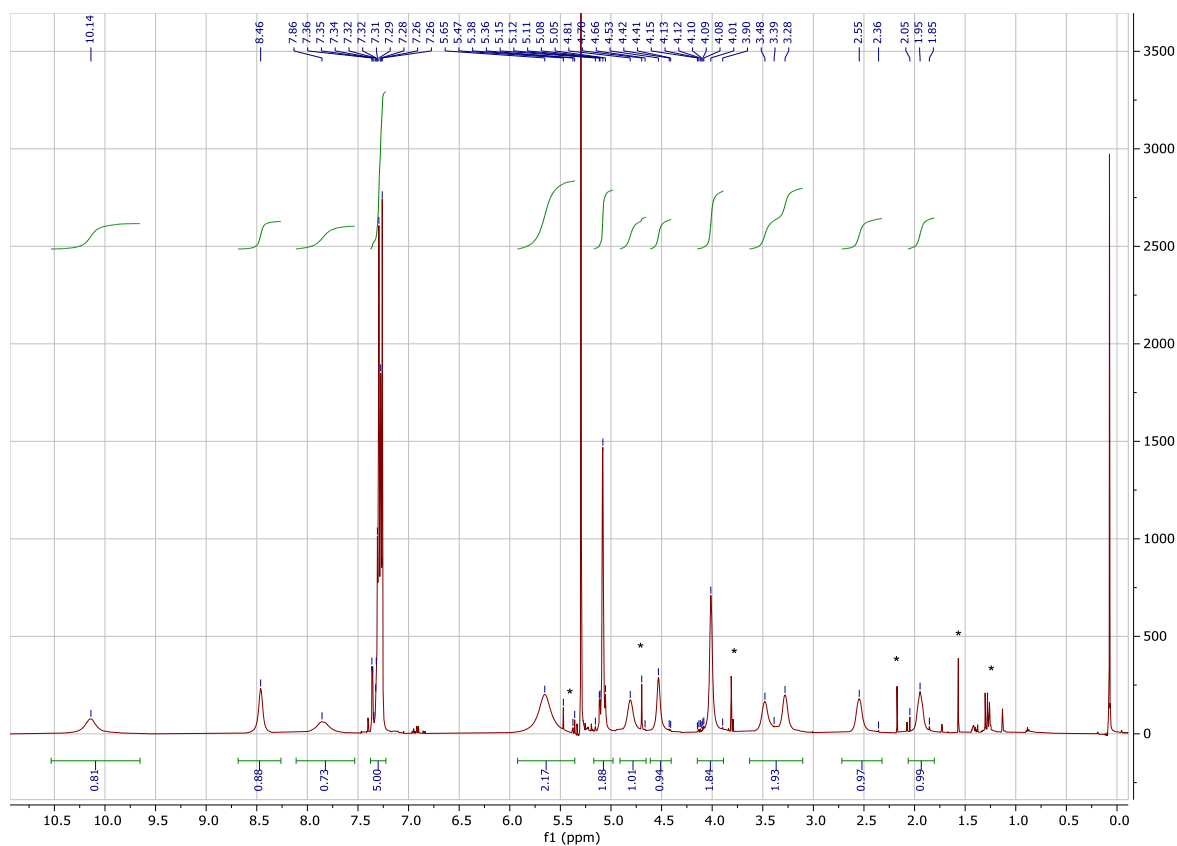

**Figure S21.**  $^1\text{H}$ -NMR of *trans*-6 in  $\text{CDCl}_3$  (signals due to solvent impurities marked with asterisks \*).

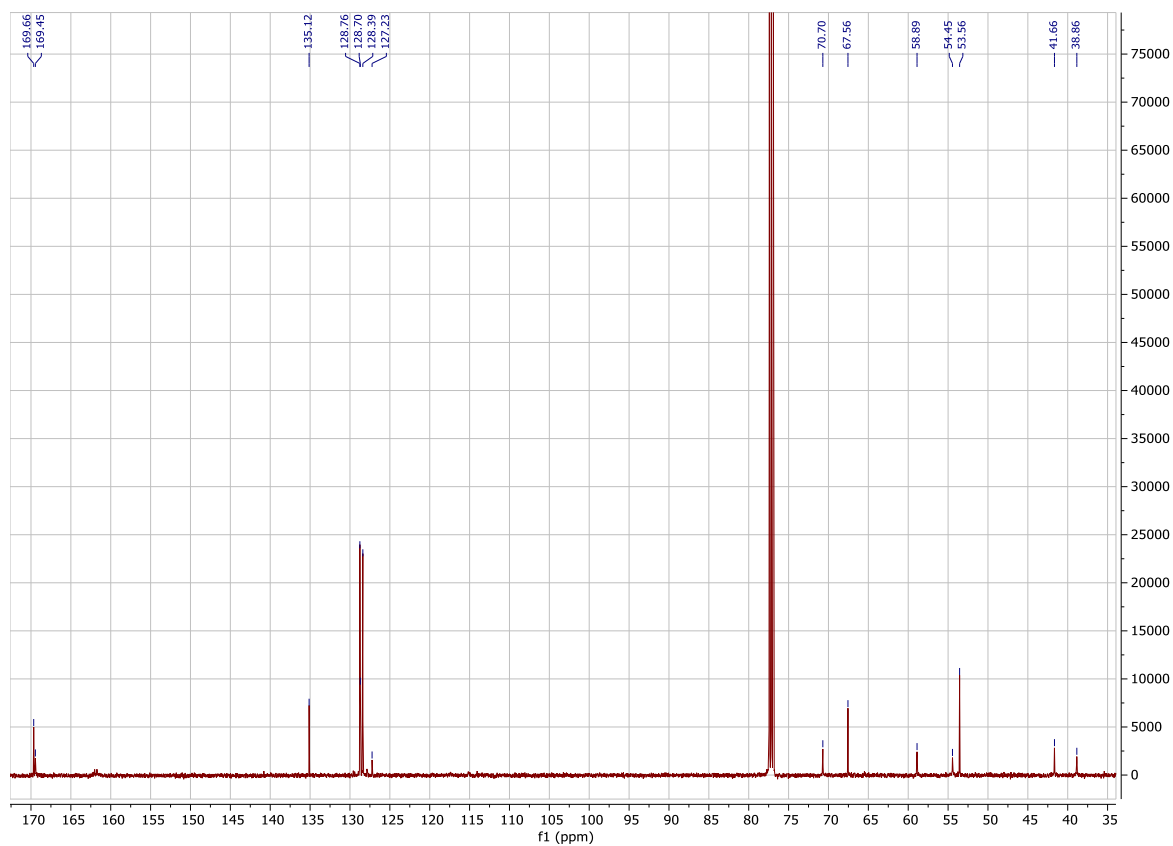

**Figure S22.**  $^{13}\text{C}$ -NMR of *trans*-6 in  $\text{CDCl}_3$ .

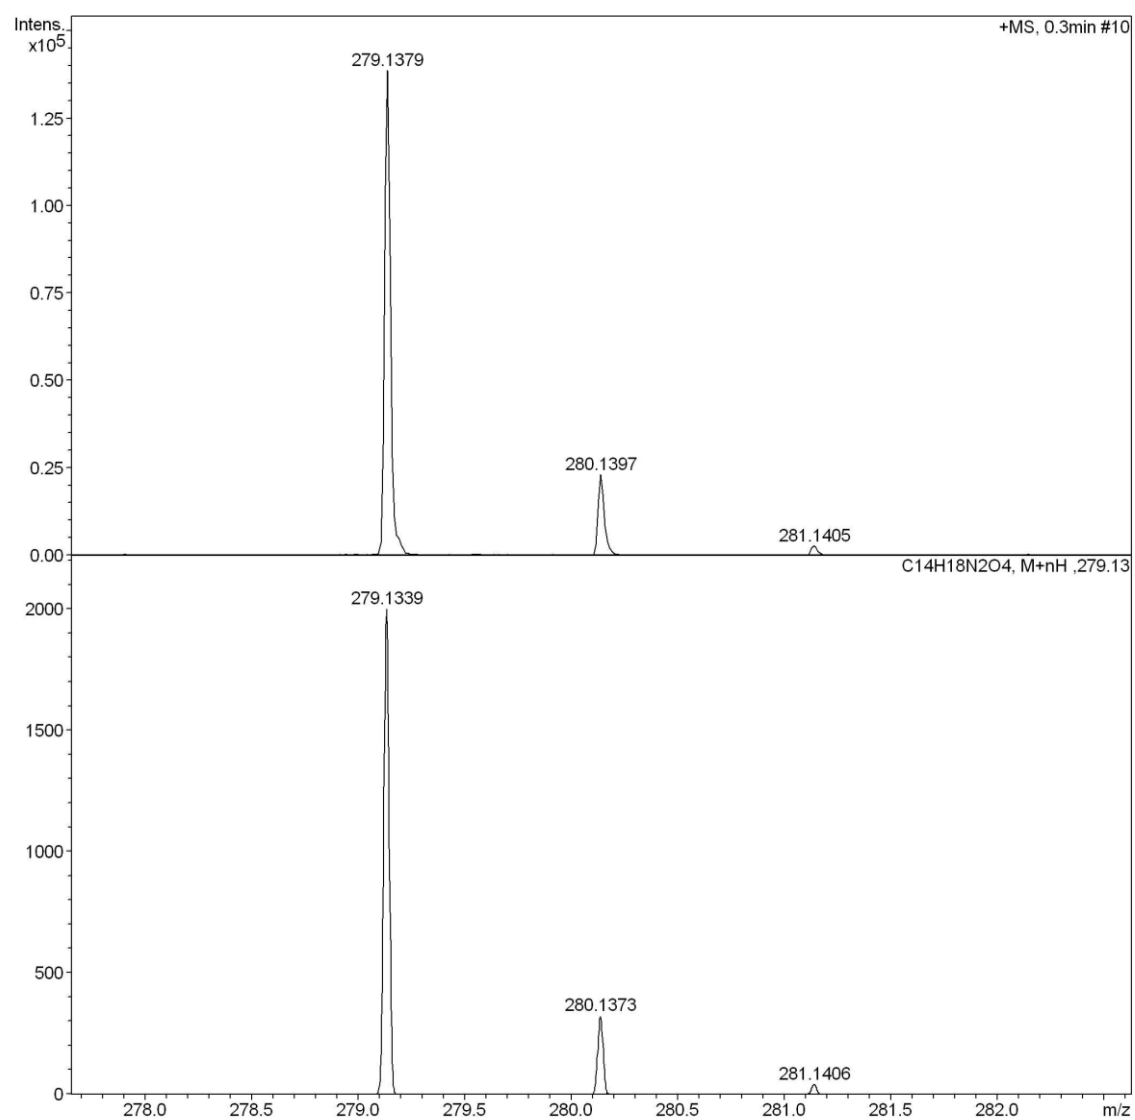

**Figure S23.** ESI-MS of *trans*-6.

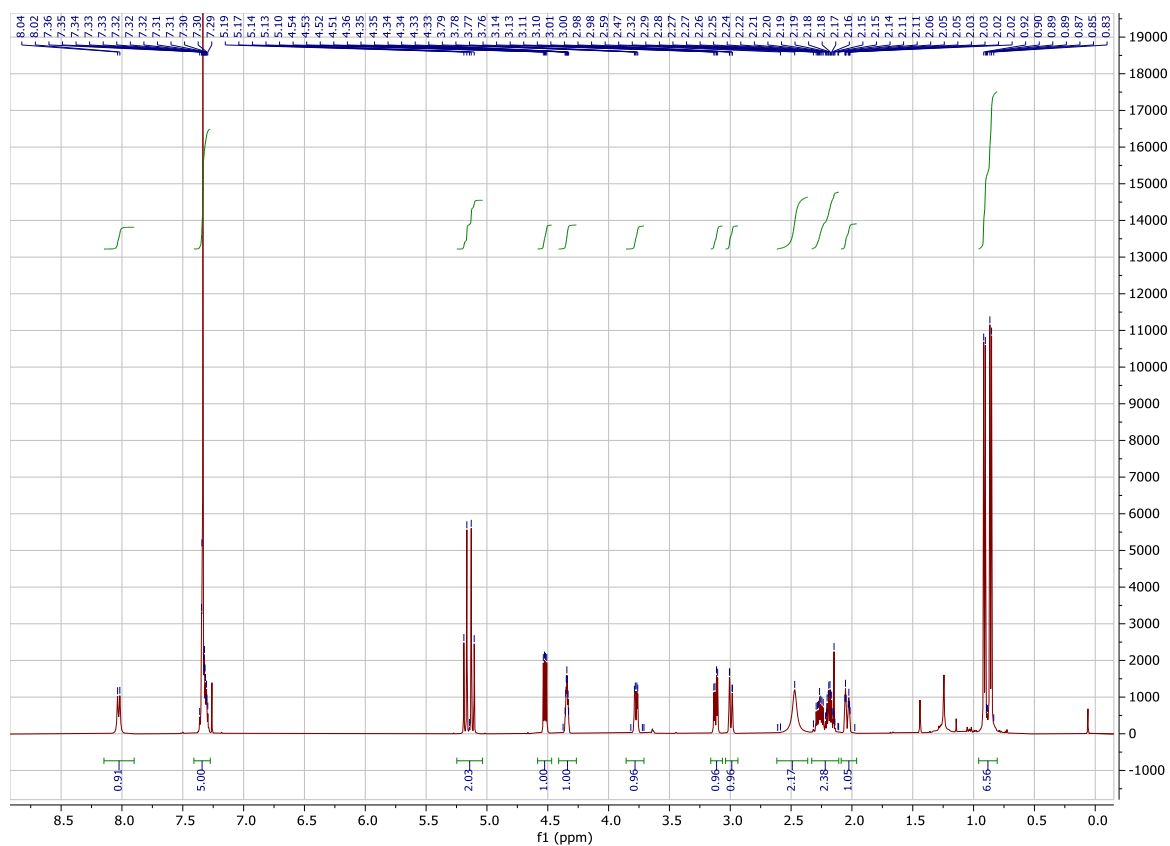

**Figure S24.**  $^1\text{H}$ -NMR of *cis*-7 in  $\text{CDCl}_3$ .

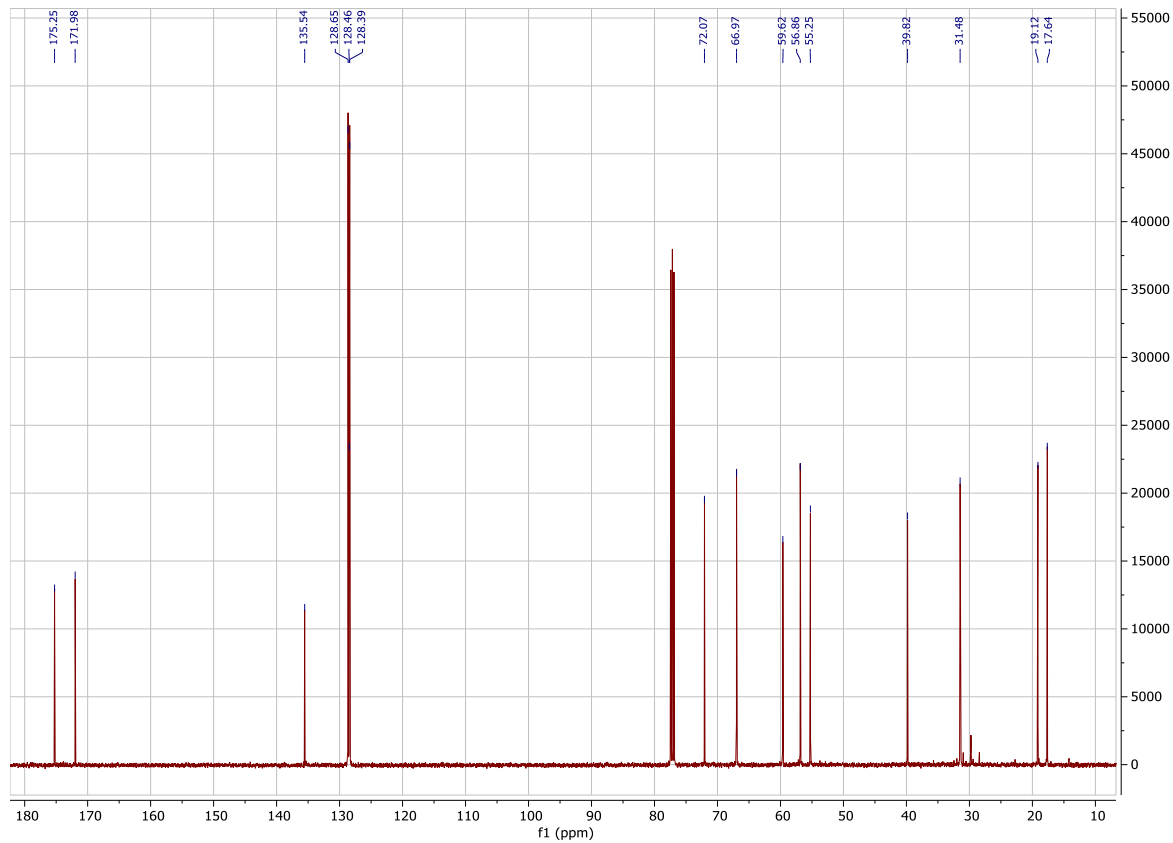

**Figure S25.**  $^{13}\text{C}$ -NMR of *cis*-7 in  $\text{CDCl}_3$ .



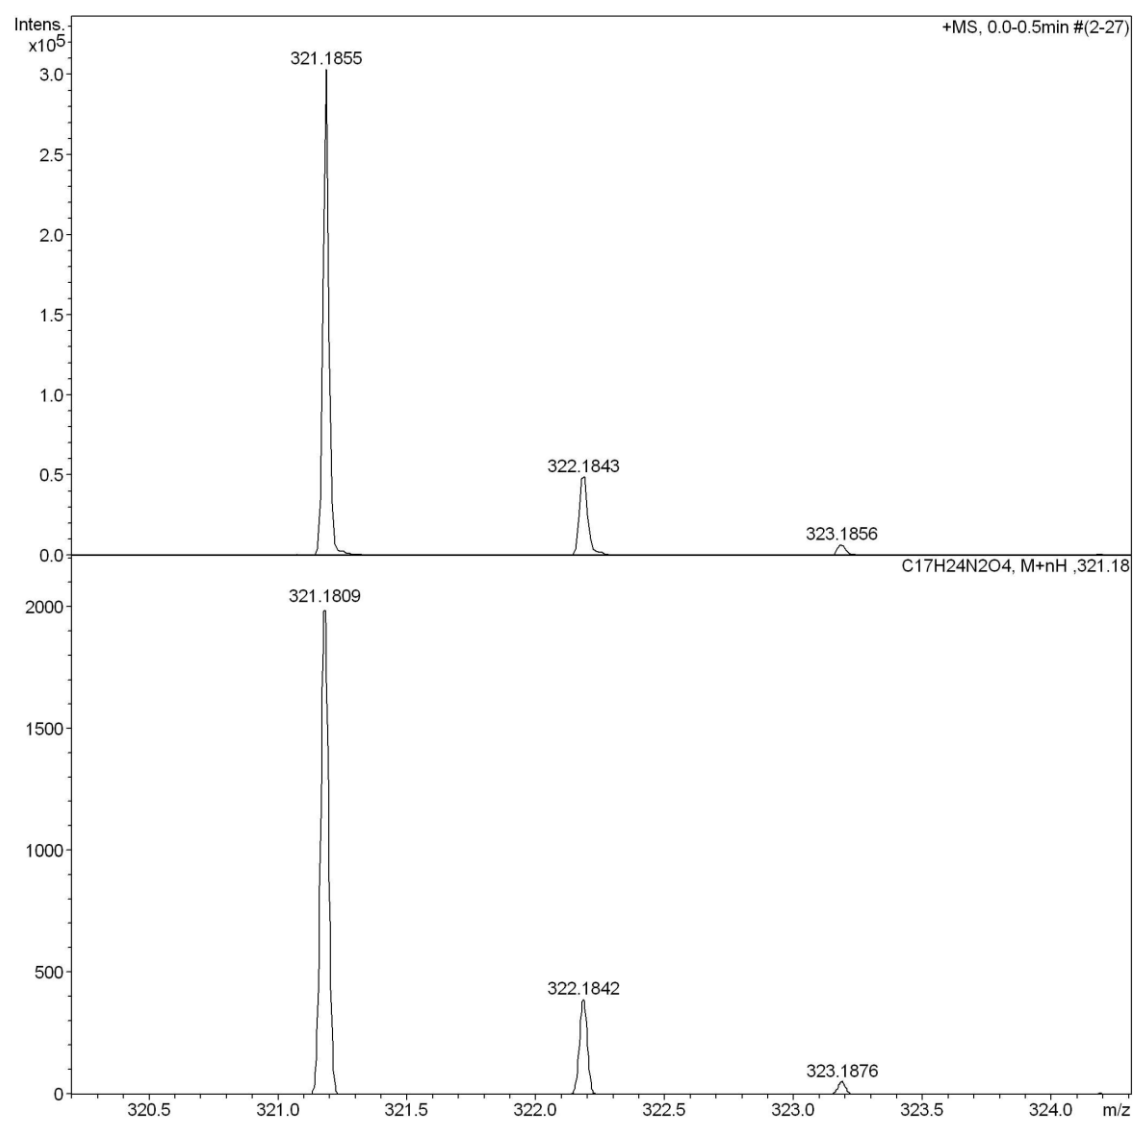

**Figure S26.** ESI-MS of *cis*-7.

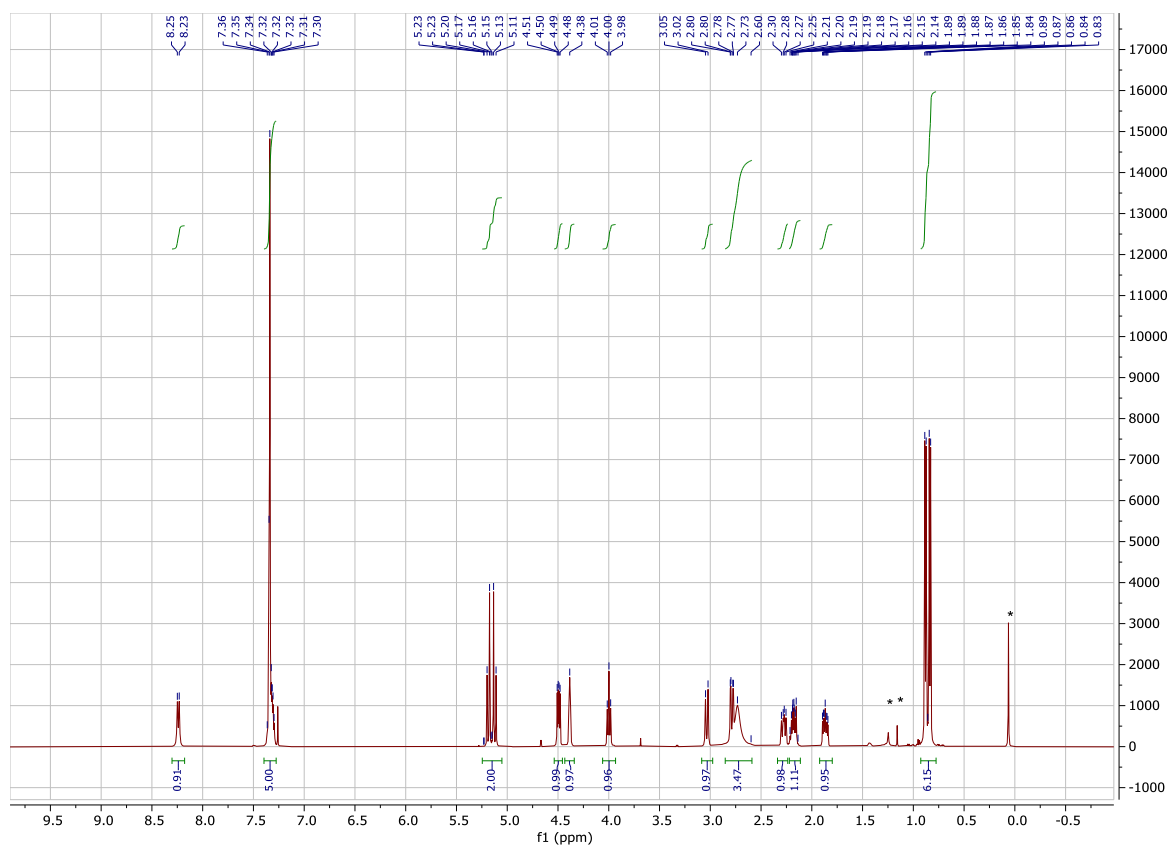

**Figure S27.**  $^1\text{H}$ -NMR of *trans*-7 in  $\text{CDCl}_3$ . (signals due to solvent impurities marked with asterisks \*).

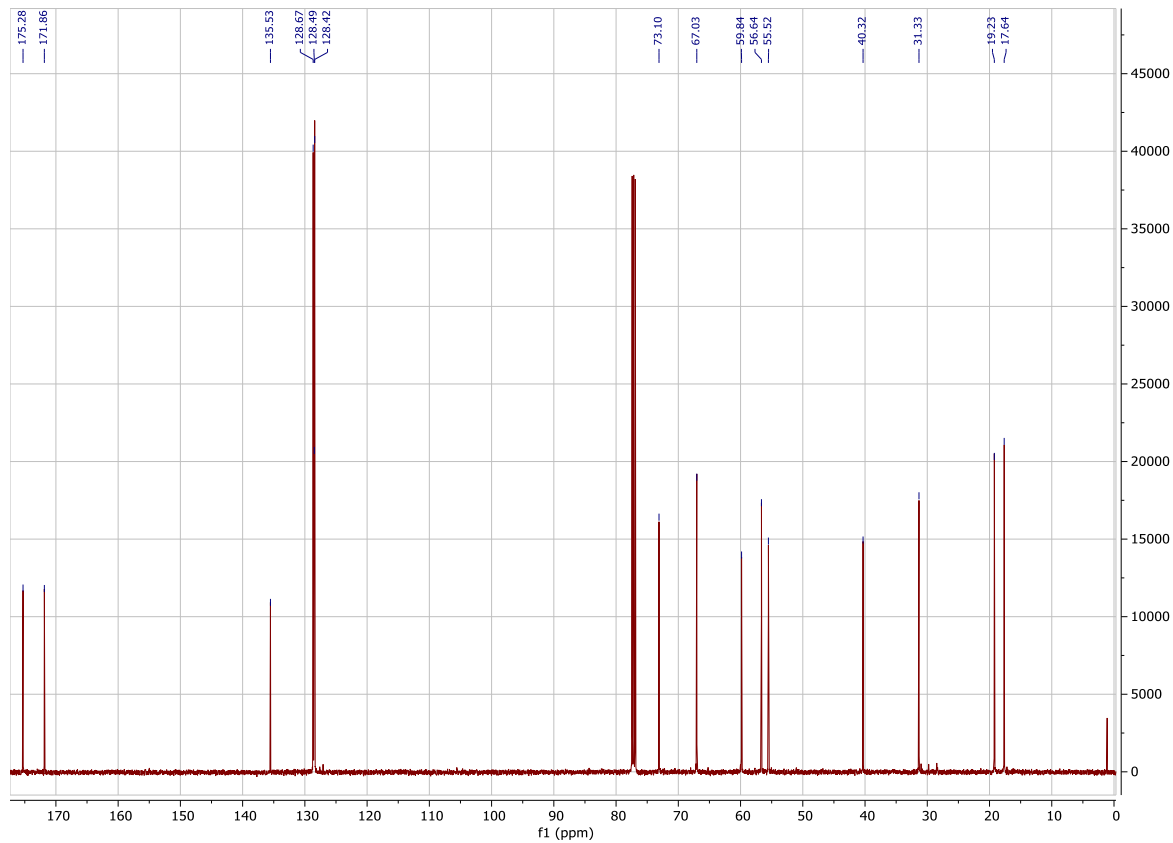

**Figure S28.**  $^{13}\text{C}$ -NMR of *trans*-7 in  $\text{CDCl}_3$ .

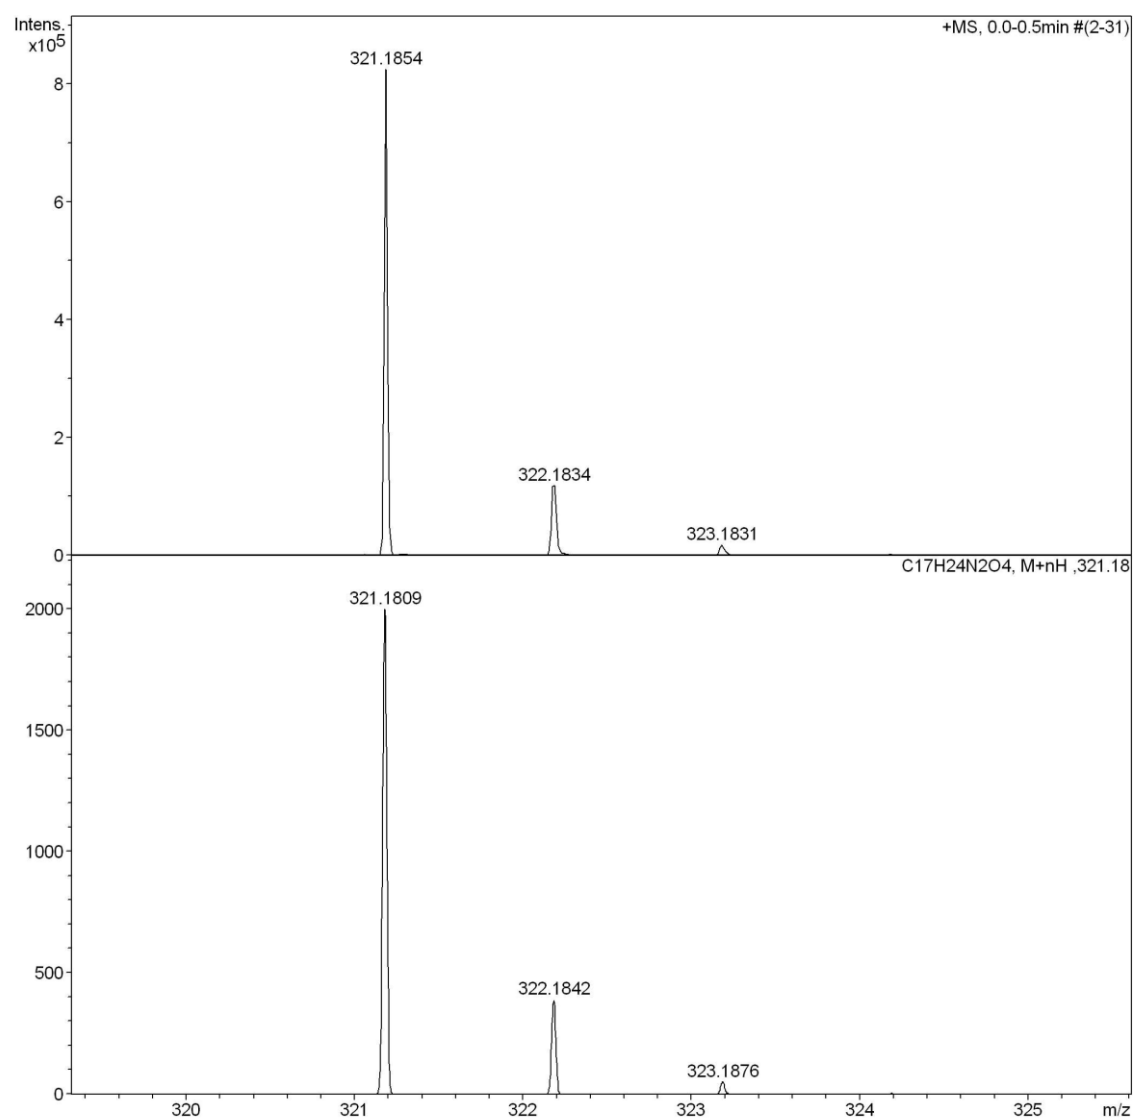

**Figure S29.** ESI-MS of *trans*-7.

## Chiral Phase HPLC Data

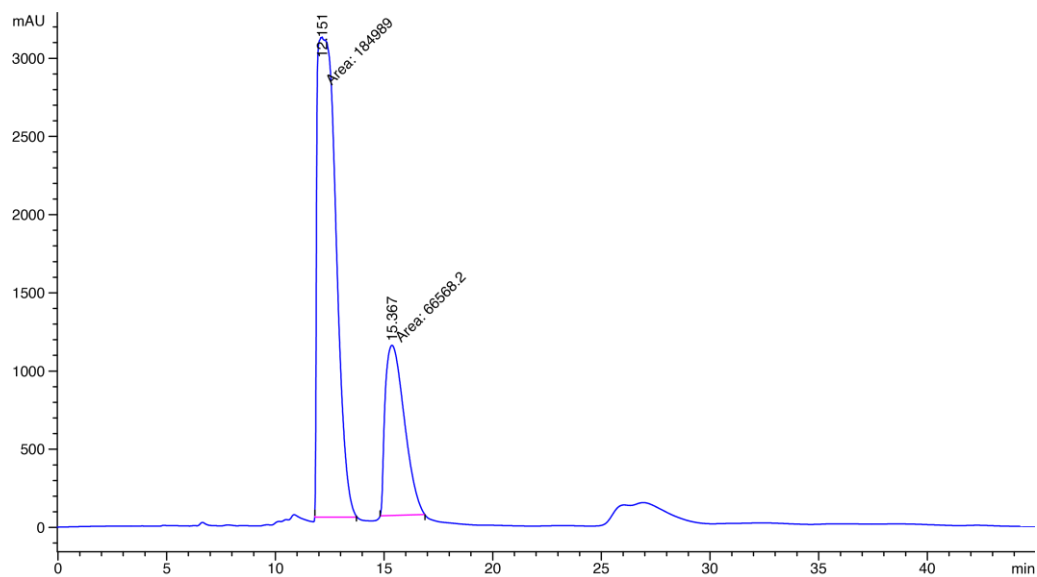

**Figure S30.** Chiral phase HPLC (Chiralpak AS-H, Daicel). *n*-hexane / isopropanol (70:30) as eluent, UV 254 nm, flow rate 0.7 mL min<sup>-1</sup> and *T* = 25 °C. Products of the aldol reaction of **8** with acetone in DMSO/acetone in presence of catalyst *cis*-**2**. The Chromatogram shows (*R*)-**9**, *t*<sub>R</sub> = 12.2 min, and (*S*)-**9**, *t*<sub>R</sub> = 15.4 min, *R/S* ratio of 74:26 (*ee* = 48 %).

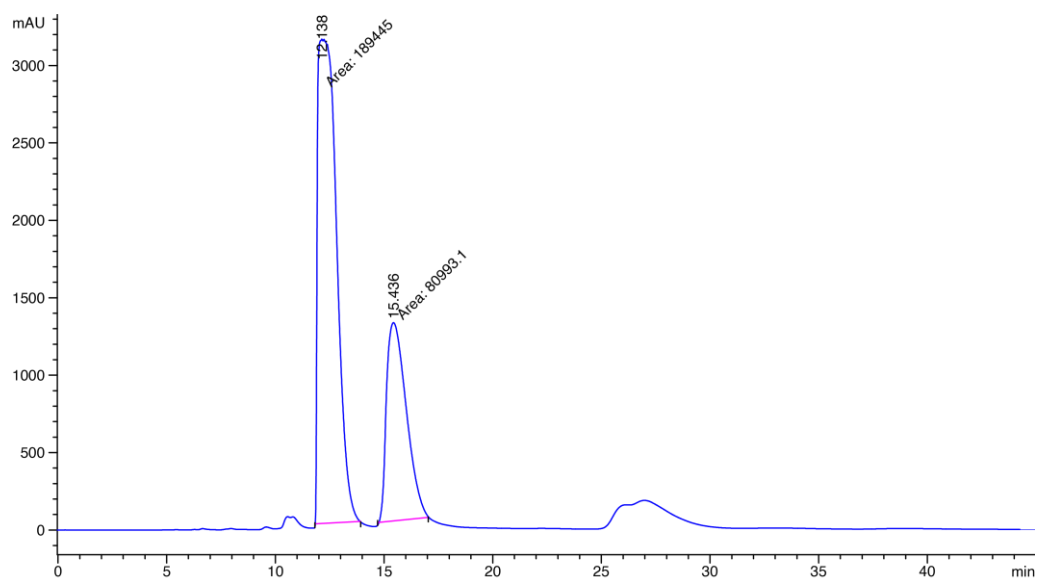

**Figure S31.** Chiral phase HPLC of (*R*)-**9**, *t*<sub>R</sub> = 12.1 min, and (*S*)-**9**, *t*<sub>R</sub> = 15.4 min, from aldol reaction of **8** with acetone in DMSO/acetone in presence of catalyst *trans*-**2**.

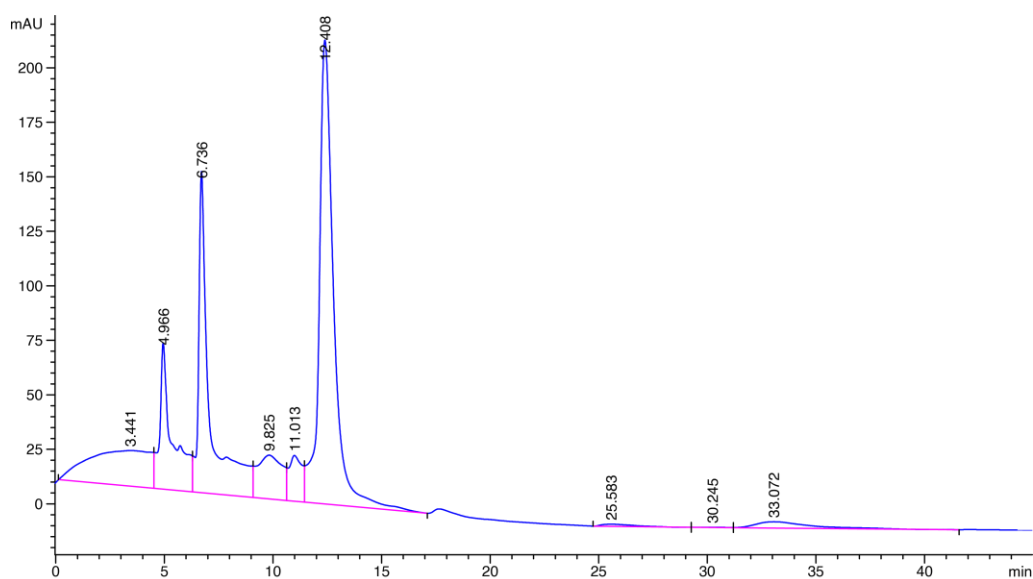

**Figure S32.** Chiral phase HPLC of (*R*)-**9**,  $t_R = 12.4$  min, from aldol reaction of **8** with acetone in DMSO/acetone in presence of catalyst *cis*-**6**. Peaks at 4.97 min and 6.74 min are from injection and starting material, respectively.

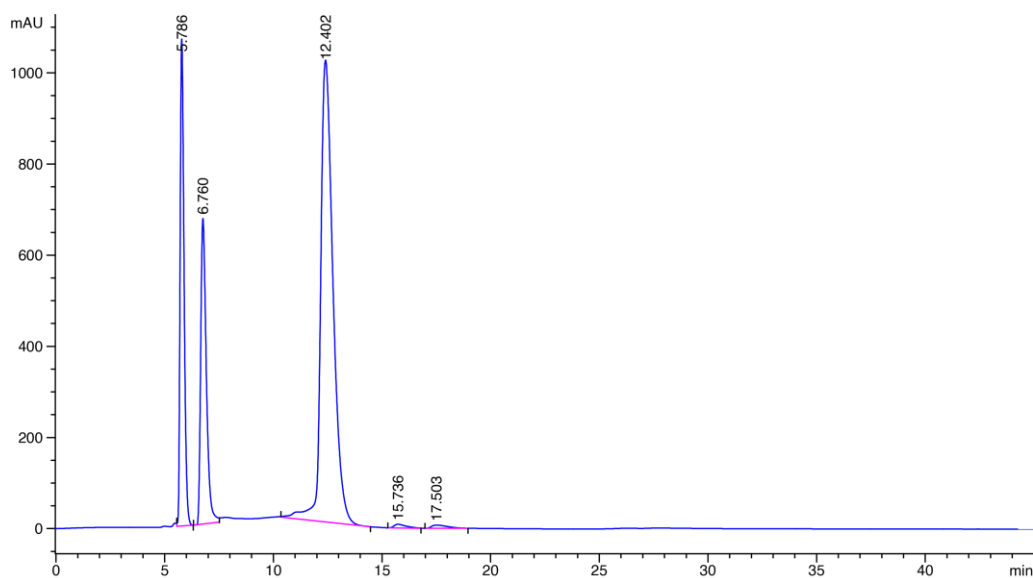

**Figure S33.** Chiral phase HPLC of (*R*)-**9**,  $t_R = 12.4$  min, from aldol reaction of **8** with acetone in DMSO/acetone in presence of catalyst *trans*-**6**. Peaks at 5.79 min and 6.76 min are from injection and starting material, respectively.

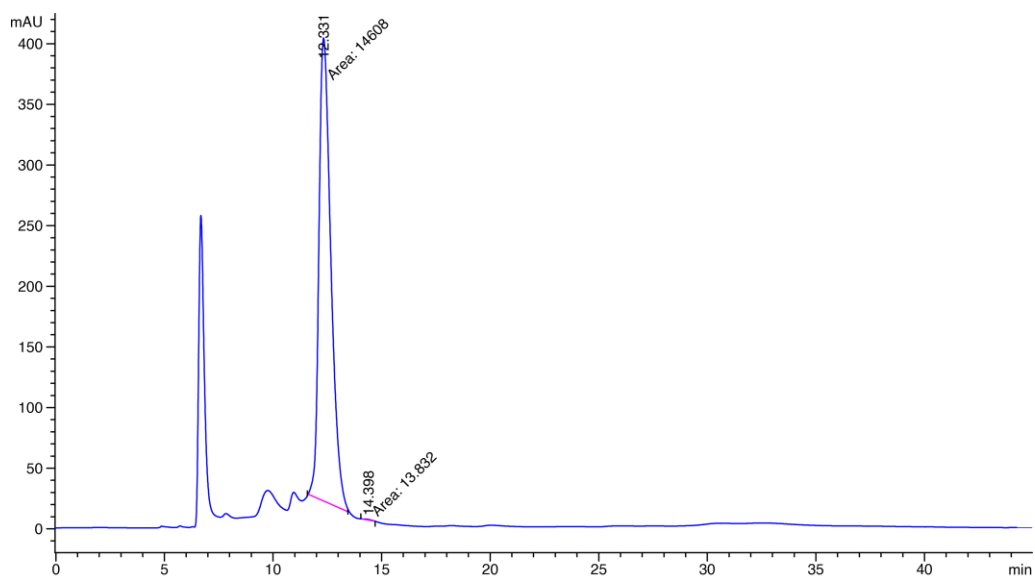

**Figure S34.** Chiral phase HPLC of (*R*)-**9**,  $t_R = 12.4$  min, from aldol reaction of **8** with acetone in pure acetone as a solvent in presence of catalyst *cis*-**6**. The peak at 6.76 min is from starting material.

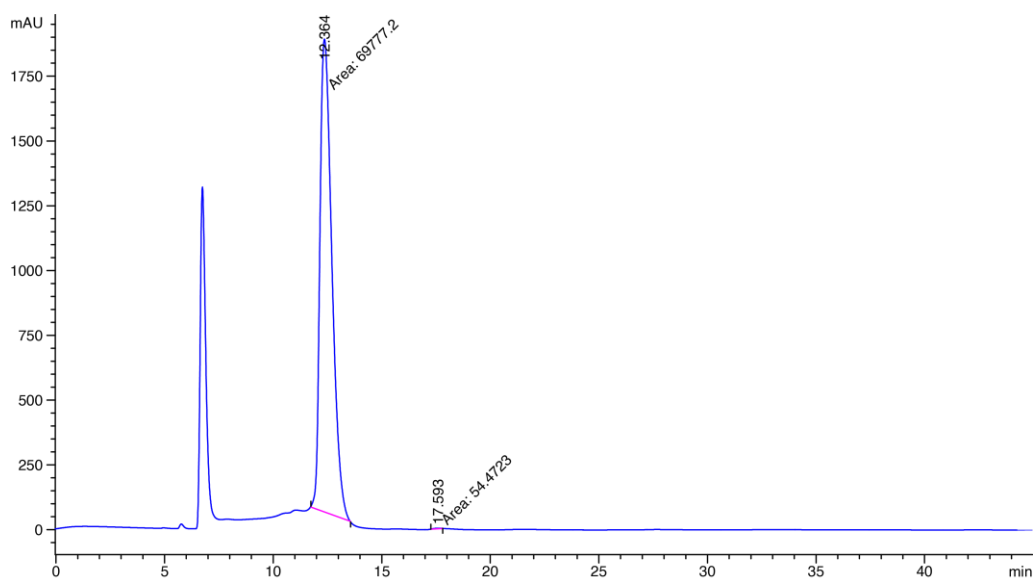

**Figure S35.** Chiral phase HPLC of (*R*)-**9**,  $t_R = 12.4$  min, from aldol reaction of **8** with acetone in pure acetone as a solvent in presence of catalyst *trans*-**6**. The peak at 6.76 min is from starting material.

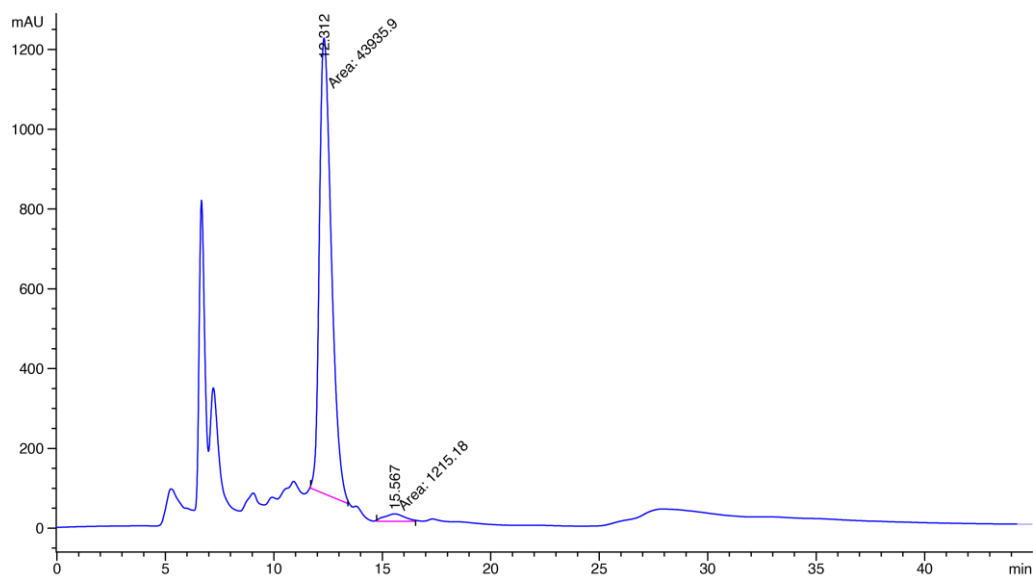

**Figure S36.** Chiral phase HPLC of (*R*)-**9**,  $t_R = 12.3$  min, and (*S*)-**9**,  $t_R = 15.6$  min, from aldol reaction of **8** with acetone in DMSO/acetone in presence of catalyst *cis*-**7**. Peaks at 5.26 min and 6.66 min are from injection and starting material, respectively.

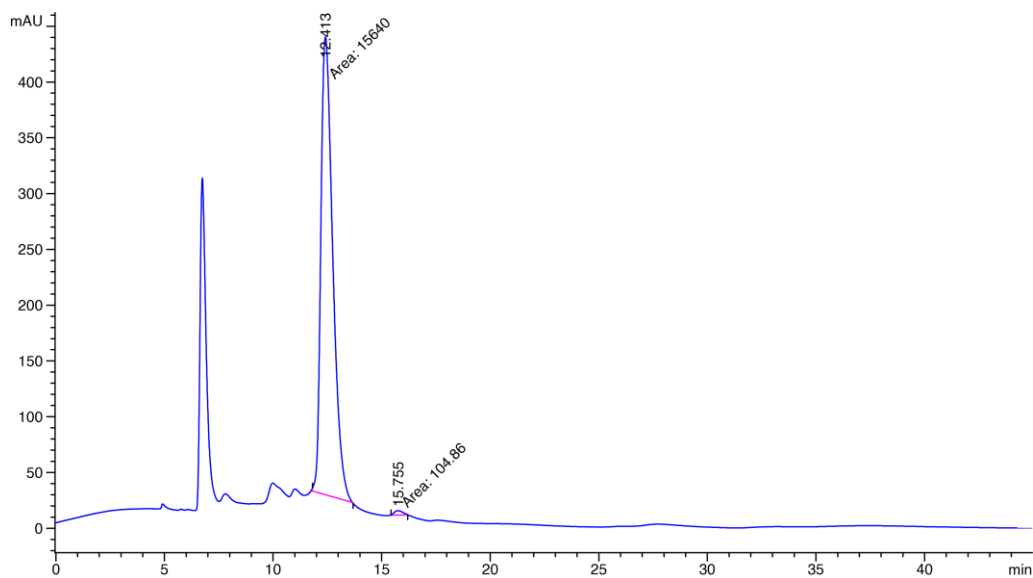

**Figure S37.** Chiral phase HPLC of (*R*)-**9**,  $t_R = 12.4$  min, and (*S*)-**9**,  $t_R = 15.8$  min, from aldol reaction of **8** with acetone in DMSO/acetone in presence of catalyst *trans*-**7**. The peak at 6.76 min is from starting material.

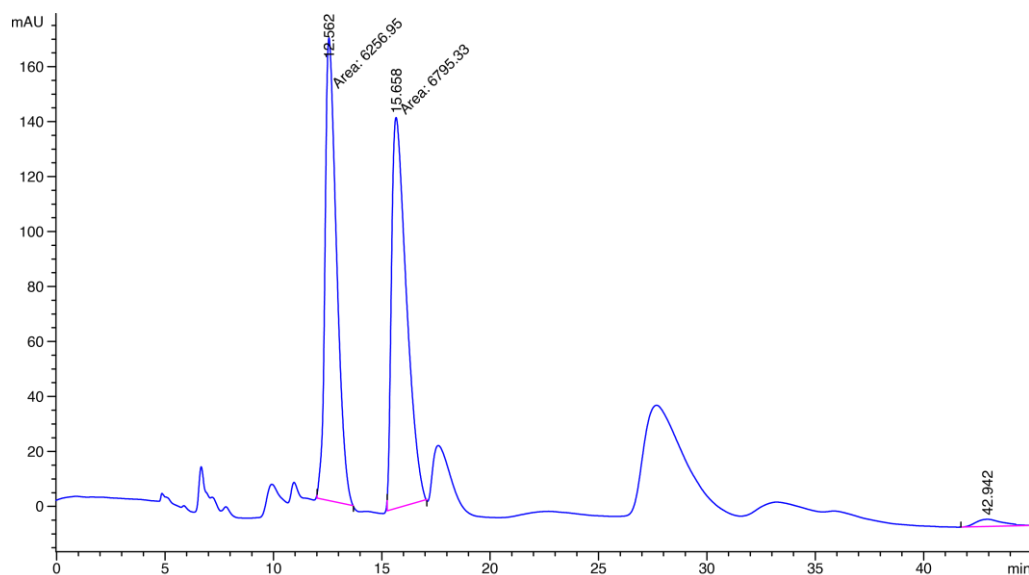

**Figure S38.** Chiral phase HPLC of (*R*)-**9**,  $t_R = 12.3$  min, and (*S*)-**9**,  $t_R = 15.6$  min, from aldol reaction of **8** with acetone in pure acetone as a solvent in presence of catalyst *cis*-**7**. Additional peaks such as the broad peak at 27.7 min presumably have their origin in by-products formed in the course of an alternative pathway with *cis*-**7** (see main article).

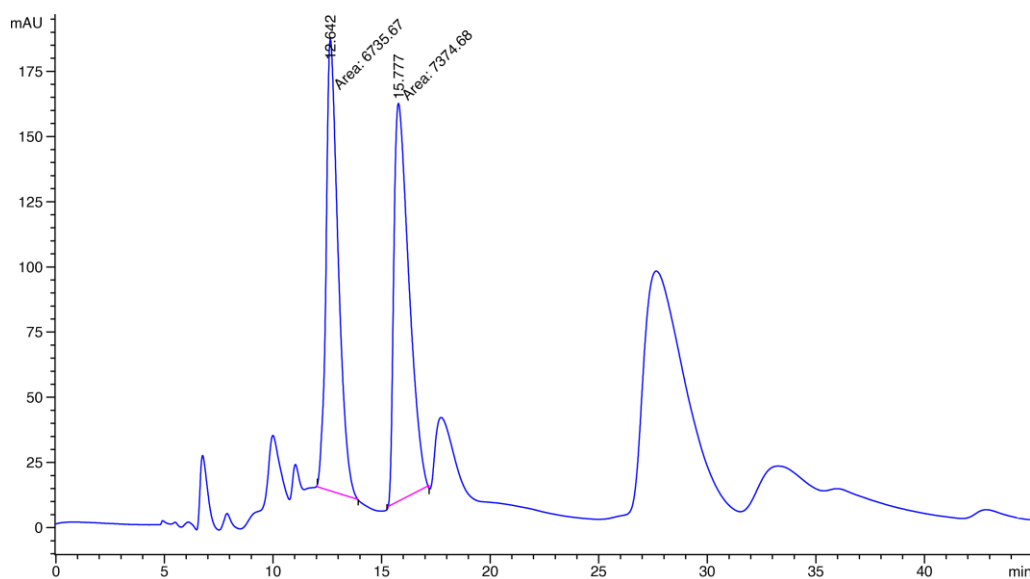

**Figure S39.** Chiral phase HPLC of (*R*)-**9**,  $t_R = 12.4$  min, and (*S*)-**9**,  $t_R = 15.8$  min, from aldol reaction of **8** with acetone in pure acetone as a solvent in presence of catalyst *trans*-**7**. Additional peaks such as the broad peak at 27.7 min presumably have their origin in by-products formed in the course of an alternative pathway with *trans*-**7** (see main article).



## Model Geometries from DFT Calculations

Aldol Reaction Cycle with *cis*-4-Hydroxy-L-proline (*cis*-2) as a Catalyst

Table S1. Numbers of conformers of intermediates and transition structures from *cis*-2.

|                                         | # conformers | # conformers accounting for $\geq 95\%$ |
|-----------------------------------------|--------------|-----------------------------------------|
| <i>cis</i> -2                           | 29           | 7                                       |
| TS1 from <i>cis</i> -2                  | 3            | 3                                       |
| Hemiaminal from <i>cis</i> -2           | 84           | 22                                      |
| TS2 from <i>cis</i> -2                  | 5            | 5                                       |
| Iminium from <i>cis</i> -2              | 2            | 1                                       |
| TS3 from <i>cis</i> -2                  | 2            | 1                                       |
| Enamine from <i>cis</i> -2              | 18           | 6                                       |
| TS4 <sub>pro R</sub> from <i>cis</i> -2 | 5            | 2                                       |
| TS4 <sub>pro S</sub> from <i>cis</i> -2 | 6            | 2                                       |
| TS3a from <i>cis</i> -2                 | 3            | 3                                       |
| Bicyclic by-product from <i>cis</i> -2  | 3            | 2                                       |

*cis*-2 (most abundant conformer; abundance: 73%)

# of imaginary frequencies: 0

Energy: -476.380230 Hartrees

Gibbs Free Energy: -476.265546 Hartrees

|   |           |           |           |
|---|-----------|-----------|-----------|
| N | 0.479235  | 1.256570  | 0.652731  |
| C | -0.437602 | 0.849238  | -0.502593 |
| C | -1.588769 | -0.002640 | 0.124145  |
| O | -1.315384 | -0.469174 | 1.282078  |
| C | 1.848997  | 0.660165  | 0.424249  |
| C | 0.472296  | -0.004196 | -1.410859 |
| H | -0.089581 | -0.799284 | -1.905792 |
| C | 1.547039  | -0.561179 | -0.454639 |
| H | 0.943083  | 0.616546  | -2.180211 |
| H | 2.445060  | -0.880298 | -0.988291 |
| H | 2.303804  | 0.413353  | 1.383690  |
| H | 2.454811  | 1.399733  | -0.101686 |
| H | -0.826699 | 1.743523  | -0.986980 |
| O | -2.596052 | -0.173219 | -0.573057 |
| H | 0.012183  | 0.784271  | 1.460683  |
| H | 0.506765  | 2.265333  | 0.813166  |
| O | 1.108389  | -1.676819 | 0.303458  |
| H | 0.268535  | -1.433804 | 0.754661  |

TS1 from *cis*-2 (most abundant conformer; abundance: 49%)

# of imaginary frequencies: 1

Energy: -669.522887 Hartrees

Gibbs Free Energy: -669.333645 Hartrees

|   |           |           |           |
|---|-----------|-----------|-----------|
| C | -0.162730 | -1.700823 | 0.170874  |
| N | 0.449038  | -0.606026 | -0.650815 |
| C | -0.668283 | 0.351833  | -0.988074 |
| C | -1.854120 | -0.610626 | -1.179333 |
| C | -1.689608 | -1.596740 | -0.010444 |
| C | 2.004476  | 0.019741  | 0.136913  |
| C | -1.033470 | 1.469184  | 0.028951  |
| O | -2.042535 | 2.113177  | -0.234514 |

|   |           |           |           |
|---|-----------|-----------|-----------|
| O | -0.279932 | 1.738929  | 1.062454  |
| O | 1.672782  | 0.314005  | 1.355854  |
| H | -0.400728 | 0.868765  | -1.912485 |
| H | -1.755533 | -1.138343 | -2.134820 |
| H | -2.811442 | -0.086380 | -1.169834 |
| H | -2.136262 | -2.573582 | -0.230743 |
| H | 0.239100  | -2.660610 | -0.153203 |
| H | 0.109048  | -1.521321 | 1.213888  |
| H | 0.755374  | -1.000683 | -1.540899 |
| H | 0.614222  | 1.115454  | 1.224045  |
| C | 2.923493  | -1.190084 | -0.010106 |
| H | 3.036960  | -1.517046 | -1.048559 |
| H | 3.912605  | -0.895203 | 0.358585  |
| H | 2.574120  | -2.023338 | 0.604476  |
| C | 2.368621  | 1.175226  | -0.797419 |
| H | 3.365604  | 1.527010  | -0.507471 |
| H | 2.412202  | 0.873393  | -1.848594 |
| H | 1.677342  | 2.013289  | -0.684317 |
| O | -2.211992 | -1.074340 | 1.212557  |
| H | -3.172731 | -0.979659 | 1.106645  |

Hemiaminal from *cis*-2 (most abundant conformer; abundance: 20%)

# of imaginary frequencies: 0

Energy: -669.537567 Hartrees

Gibbs Free Energy: -669.345906 Hartrees

|   |           |           |           |
|---|-----------|-----------|-----------|
| C | 0.550545  | 0.375936  | 0.729572  |
| C | 1.409473  | -0.787739 | 1.265926  |
| C | 1.312936  | -1.826210 | 0.143774  |
| C | -0.142659 | -1.689821 | -0.289073 |
| N | -0.435584 | -0.234914 | -0.201191 |
| C | 1.405277  | 1.412494  | -0.021119 |
| H | 2.434917  | -0.483027 | 1.492256  |
| H | 0.961306  | -1.188170 | 2.181437  |
| H | -0.769132 | -2.276975 | 0.397302  |
| H | -0.298374 | -2.062900 | -1.304241 |
| H | 0.058044  | 0.895012  | 1.555408  |

|   |           |           |           |
|---|-----------|-----------|-----------|
| C | -1.852484 | 0.132007  | 0.030736  |
| C | -2.745852 | -0.598666 | -0.979553 |
| H | -2.434715 | -0.381021 | -2.005832 |
| H | -2.718353 | -1.683977 | -0.837480 |
| H | -3.780116 | -0.268708 | -0.848601 |
| C | -2.038538 | 1.647122  | -0.103598 |
| H | -3.094600 | 1.891679  | 0.038643  |
| H | -1.466736 | 2.193066  | 0.652091  |
| H | -1.729819 | 1.991344  | -1.094104 |
| O | 2.276732  | 2.070203  | 0.514440  |
| O | 1.099002  | 1.540720  | -1.315933 |
| O | -2.265416 | -0.175574 | 1.371503  |
| O | 2.127932  | -1.476124 | -0.977448 |
| H | 3.054622  | -1.509958 | -0.689642 |
| H | 0.397029  | 0.842383  | -1.453308 |
| H | -2.401666 | -1.134930 | 1.437673  |
| H | 1.538495  | -2.843961 | 0.486240  |

TS2 from *cis*-2 (most abundant conformer;  
abundance: 40%)

# of imaginary frequencies: 1

Energy: -669.520671 Hartrees

Gibbs Free Energy: -669.331775 Hartrees

|   |           |           |           |
|---|-----------|-----------|-----------|
| C | 1.549520  | -1.684755 | 0.068657  |
| C | 0.019781  | -1.833461 | 0.066713  |
| N | -0.477952 | -0.515281 | 0.529337  |
| C | 0.629209  | 0.359334  | 0.975443  |
| C | 1.778776  | -0.651073 | 1.183480  |
| C | -1.717338 | -0.052916 | 0.205796  |
| C | 1.073998  | 1.458631  | -0.030654 |
| O | 0.687121  | 1.340703  | -1.272677 |
| O | 1.828080  | 2.333880  | 0.388576  |
| O | -1.559855 | 0.440445  | -1.485778 |
| H | 0.370326  | 0.857541  | 1.912609  |
| H | 1.676836  | -1.129857 | 2.163649  |
| H | 2.761758  | -0.179692 | 1.125284  |
| H | -0.307412 | -2.624381 | 0.751839  |
| H | -0.338237 | -2.069986 | -0.938668 |
| H | -0.502391 | 0.874141  | -1.442233 |
| H | -2.183287 | 1.156579  | -1.705014 |
| C | -2.812151 | -1.092489 | 0.079371  |
| H | -3.027226 | -1.500593 | 1.073533  |
| H | -3.723514 | -0.633945 | -0.310178 |
| H | -2.525949 | -1.911909 | -0.580816 |
| C | -2.152992 | 1.227910  | 0.895183  |
| H | -2.268490 | 1.031226  | 1.966695  |
| H | -1.434587 | 2.040532  | 0.770693  |
| H | -3.120225 | 1.556291  | 0.507727  |
| O | 2.057577  | -1.262838 | -1.193704 |
| H | 1.613121  | -0.425415 | -1.437117 |
| H | 2.038731  | -2.638171 | 0.281358  |

Iminium from *cis*-2 (most abundant conformer;  
abundance: 100%)

# of imaginary frequencies: 0

Energy: -593.108981 Hartrees

Gibbs Free Energy: -592.943141 Hartrees

|   |          |          |          |
|---|----------|----------|----------|
| C | 0.328976 | 0.551767 | 0.845165 |
|---|----------|----------|----------|

|   |           |           |           |
|---|-----------|-----------|-----------|
| C | 1.540307  | -0.291027 | 1.279868  |
| C | 1.584896  | -1.479408 | 0.296670  |
| C | 0.091297  | -1.788275 | 0.089449  |
| N | -0.600269 | -0.479170 | 0.266405  |
| C | 0.673558  | 1.662501  | -0.221643 |
| O | 1.296721  | 1.275506  | -1.251923 |
| O | 0.296740  | 2.815881  | 0.061523  |
| H | 2.469976  | 0.281773  | 1.253198  |
| H | 1.390593  | -0.657088 | 2.301297  |
| H | -0.292594 | -2.479609 | 0.846998  |
| H | -0.107133 | -2.190951 | -0.904788 |
| H | 2.081423  | -2.347450 | 0.739509  |
| H | -0.174868 | 1.021238  | 1.689223  |
| C | -1.853412 | -0.289722 | -0.010515 |
| C | -2.519160 | 1.031369  | 0.195131  |
| H | -1.828516 | 1.849801  | 0.394703  |
| H | -3.112308 | 1.266572  | -0.695656 |
| H | -3.232089 | 0.930605  | 1.024814  |
| C | -2.680203 | -1.419402 | -0.545867 |
| H | -3.738219 | -1.154474 | -0.532399 |
| H | -2.393368 | -1.629106 | -1.584588 |
| H | -2.532094 | -2.338381 | 0.029180  |
| O | 2.248380  | -1.189692 | -0.911637 |
| H | 1.938796  | -0.279114 | -1.179575 |

TS3 from *cis*-2 (most abundant conformer;  
abundance: 99%)

# of imaginary frequencies: 1

Energy: -593.077094 Hartrees

Gibbs Free Energy: -592.913949 Hartrees

|   |           |           |           |
|---|-----------|-----------|-----------|
| C | 0.309759  | 0.479180  | 0.907463  |
| C | 1.583523  | -0.289682 | 1.265843  |
| C | 1.696558  | -1.366041 | 0.172514  |
| C | 0.225105  | -1.765684 | -0.069229 |
| N | -0.561147 | -0.570541 | 0.311119  |
| C | 0.508374  | 1.602931  | -0.152090 |
| O | -0.559110 | 2.259530  | -0.507600 |
| O | 1.625588  | 1.821056  | -0.631616 |
| H | 2.462090  | 0.356690  | 1.301160  |
| H | 1.456026  | -0.762711 | 2.244614  |
| H | -0.068342 | -2.612476 | 0.561994  |
| H | 0.064785  | -2.031236 | -1.116540 |
| H | 2.267250  | -2.236241 | 0.509885  |
| H | -0.172543 | 0.903909  | 1.792771  |
| C | -1.865143 | -0.382694 | 0.089204  |
| C | -2.493773 | 0.818497  | 0.489084  |
| H | -1.579362 | 1.707277  | -0.150765 |
| H | -3.556264 | 0.886946  | 0.274642  |
| C | -2.590455 | -1.423503 | -0.718650 |
| H | -3.630009 | -1.131098 | -0.869507 |
| H | -2.118331 | -1.577993 | -1.695375 |
| H | -2.574744 | -2.386701 | -0.194461 |
| H | -2.224307 | 1.218285  | 1.469443  |
| O | 2.324816  | -0.888804 | -1.009281 |
| H | 2.227753  | 0.086859  | -1.022541 |

Enamine from *cis*-2 (most abundant conformer;  
abundance: 31%)

# of imaginary frequencies: 0

Energy: -593.094165 Hartrees  
Gibbs Free Energy: -592.927035 Hartrees

|   |           |           |           |
|---|-----------|-----------|-----------|
| C | -1.257201 | -1.720875 | -0.368647 |
| C | 0.263701  | -1.776470 | -0.248693 |
| N | 0.633837  | -0.359880 | -0.148825 |
| C | -0.357250 | 0.497316  | -0.805012 |
| C | -1.474006 | -0.487400 | -1.246201 |
| C | -0.877473 | 1.600334  | 0.138213  |
| O | -1.880967 | -1.448428 | 0.902511  |
| O | -1.398436 | 1.191795  | 1.302246  |
| O | -0.836347 | 2.782145  | -0.145775 |
| C | 1.951629  | 0.071165  | 0.013355  |
| C | 2.356795  | 1.335477  | -0.233219 |
| C | 2.915668  | -0.967748 | 0.537173  |
| H | -1.679959 | -2.634500 | -0.797472 |
| H | 0.587544  | -2.338686 | 0.632344  |
| H | 0.688938  | -2.267461 | -1.138541 |
| H | 0.072763  | 1.018413  | -1.668387 |
| H | -2.483368 | -0.080831 | -1.142335 |
| H | -1.325492 | -0.758609 | -2.294906 |
| H | -1.636845 | -2.150116 | 1.529213  |
| H | -1.452664 | 0.199473  | 1.328694  |
| H | 1.692855  | 2.118202  | -0.579829 |
| H | 3.388894  | 1.610851  | -0.048518 |
| H | 2.592042  | -1.359305 | 1.509587  |
| H | 3.005056  | -1.823795 | -0.142649 |
| H | 3.908210  | -0.529360 | 0.660903  |

TS4<sub>pro R</sub> from *cis*-**2** (most abundant conformer;  
abundance: 89%)  
# of imaginary frequencies: 1  
Energy: -1143.170376 Hartrees  
Gibbs Free Energy: -1142.905113 Hartrees

|   |           |           |           |
|---|-----------|-----------|-----------|
| C | -2.694411 | 2.176724  | 0.712901  |
| C | -1.823060 | 1.167419  | 1.450626  |
| N | -2.372619 | -0.140425 | 1.011862  |
| C | -3.763714 | 0.008289  | 0.529652  |
| C | -4.073880 | 1.505752  | 0.775957  |
| C | -4.014714 | -0.366633 | -0.952056 |
| O | -3.003905 | -0.586809 | -1.776809 |
| O | -5.172389 | -0.456658 | -1.320722 |
| C | -1.712577 | -1.298129 | 1.114867  |
| C | -2.445654 | -2.579457 | 0.820658  |
| C | -0.317152 | -1.308765 | 1.289689  |
| H | -0.770724 | 1.265252  | 1.196505  |
| H | -1.938110 | 1.258681  | 2.536991  |
| H | -2.691105 | 3.149784  | 1.215158  |
| H | -4.769644 | 1.905739  | 0.036903  |
| H | -4.510279 | 1.636577  | 1.771449  |
| H | -4.436775 | -0.631071 | 1.106023  |
| H | -1.798323 | -3.435322 | 1.015258  |
| H | -3.336871 | -2.669405 | 1.451338  |
| H | -2.772488 | -2.628257 | -0.223850 |
| H | 0.141893  | -2.274539 | 1.473724  |
| H | 0.167059  | -0.485201 | 1.799852  |
| H | -2.067862 | -0.348581 | -1.427844 |
| O | -0.618357 | 0.073787  | -1.111056 |
| C | 0.167698  | -0.842425 | -0.664699 |

|   |           |           |           |
|---|-----------|-----------|-----------|
| C | 1.616287  | -0.515378 | -0.449288 |
| C | 2.051533  | 0.818364  | -0.466285 |
| C | 3.396086  | 1.125903  | -0.295988 |
| C | 4.305509  | 0.081906  | -0.115157 |
| C | 3.903047  | -1.255587 | -0.106245 |
| C | 2.554998  | -1.545106 | -0.276158 |
| N | 5.721980  | 0.397133  | 0.061823  |
| O | 6.062101  | 1.583520  | 0.049054  |
| O | 6.512862  | -0.537692 | 0.217048  |
| H | 0.011281  | -1.870497 | -1.021106 |
| H | 1.327654  | 1.609235  | -0.628577 |
| H | 3.745852  | 2.150511  | -0.308190 |
| H | 4.636606  | -2.040574 | 0.026620  |
| H | 2.227015  | -2.580901 | -0.278088 |
| O | -2.276728 | 2.351164  | -0.638345 |
| H | -1.539363 | 1.735852  | -0.822160 |

TS4<sub>pro S</sub> from *cis*-**2** (most abundant conformer;  
abundance: 57%)  
# of imaginary frequencies: 1  
Energy: -1143.168629 Hartrees  
Gibbs Free Energy: -1142.902869 Hartrees

|   |           |           |           |
|---|-----------|-----------|-----------|
| C | 4.222827  | -0.829991 | -0.689427 |
| C | 3.261047  | -1.592984 | 0.212441  |
| N | 2.469071  | -0.512186 | 0.855547  |
| C | 3.211569  | 0.768797  | 0.827939  |
| C | 4.566026  | 0.389137  | 0.178600  |
| C | 2.537621  | 1.923376  | 0.048746  |
| O | 1.508965  | 1.683704  | -0.749450 |
| O | 2.988956  | 3.044667  | 0.193357  |
| C | 1.286404  | -0.706210 | 1.438805  |
| C | 0.659526  | 0.422756  | 2.209699  |
| C | 0.543850  | -1.873418 | 1.154607  |
| H | 2.625748  | -2.275657 | -0.346326 |
| H | 3.795577  | -2.152010 | 0.988790  |
| H | 5.111232  | -1.427525 | -0.920808 |
| H | 4.986180  | 1.212445  | -0.401109 |
| H | 5.284317  | 0.108192  | 0.955476  |
| H | 3.353543  | 1.147021  | 1.842838  |
| H | 1.356251  | 0.824074  | 2.953258  |
| H | 0.369533  | 1.247186  | 1.547842  |
| H | -0.234719 | 0.073473  | 2.726406  |
| H | -0.350325 | -2.023082 | 1.749953  |
| H | 1.078881  | -2.792174 | 0.943360  |
| H | 1.268351  | 0.698581  | -0.893593 |
| O | 0.839415  | -0.726384 | -1.345467 |
| C | -0.047281 | -1.440689 | -0.733533 |
| C | -1.429183 | -0.884167 | -0.507077 |
| C | -1.713498 | 0.471088  | -0.732872 |
| C | -3.002100 | 0.965125  | -0.555007 |
| C | -4.010818 | 0.086986  | -0.158943 |
| C | -3.762877 | -1.271253 | 0.056362  |
| C | -2.471044 | -1.746275 | -0.123206 |
| N | -5.366986 | 0.599253  | 0.027115  |
| O | -5.571264 | 1.799436  | -0.175915 |
| O | -6.246146 | -0.191992 | 0.380230  |
| H | -0.080644 | -2.507542 | -0.996873 |
| H | -0.926429 | 1.140214  | -1.059974 |
| H | -3.231474 | 2.009632  | -0.724717 |

|   |           |           |           |
|---|-----------|-----------|-----------|
| H | -4.570529 | -1.929094 | 0.351266  |
| H | -2.266008 | -2.801781 | 0.034181  |
| O | 3.598055  | -0.427461 | -1.903846 |
| H | 2.659663  | -0.710857 | -1.882676 |

TS3a from *cis*-**2** (most abundant conformer;  
abundance: 56%)

# of imaginary frequencies: 1

Energy: -593.092489 Hartrees

Gibbs Free Energy: -592.924941 Hartrees

|   |           |           |           |
|---|-----------|-----------|-----------|
| H | 2.666919  | -0.985774 | 1.627529  |
| H | 0.963802  | -1.458011 | 1.781687  |
| C | 2.647384  | 0.072423  | -0.846612 |
| H | 3.456558  | 0.473004  | -0.227884 |
| H | 3.008145  | -0.820356 | -1.366696 |
| H | 2.376438  | 0.820554  | -1.598173 |
| O | -1.776029 | -0.635280 | 1.347690  |
| H | -2.523256 | -0.077008 | 1.617724  |

|   |           |           |           |
|---|-----------|-----------|-----------|
| C | -1.650565 | -0.312954 | 0.064571  |
| N | -0.469000 | -0.663329 | 0.590401  |
| C | 0.356987  | 0.482848  | 1.002357  |
| C | 1.746727  | -0.104194 | 1.226410  |
| C | 1.850907  | -1.153172 | 0.110710  |
| C | 0.418542  | -1.726369 | 0.039338  |
| C | 0.258061  | 1.457895  | -0.238533 |
| O | -0.817040 | 1.326200  | -0.908219 |
| O | 1.215352  | 2.219341  | -0.471665 |
| H | 2.565749  | -1.948712 | 0.341256  |
| H | 2.523098  | 0.660845  | 1.156670  |
| H | 1.809522  | -0.578373 | 2.211075  |
| H | -0.035023 | 0.989451  | 1.886963  |
| H | 0.311937  | -2.617788 | 0.666239  |
| H | 0.162217  | -1.986862 | -0.987818 |
| C | -2.271528 | -1.156326 | -1.012003 |
| H | -2.482657 | -2.160807 | -0.625480 |
| H | -3.213181 | -0.713421 | -1.340446 |
| H | -1.607682 | -1.254600 | -1.873965 |
| C | -2.611441 | 0.515641  | 0.875470  |
| H | -3.209928 | 1.146988  | 0.216685  |
| H | -3.291504 | -0.178858 | 1.388216  |
| H | -2.128722 | 1.138201  | 1.627691  |
| O | 2.242287  | -0.578552 | -1.137727 |
| H | 2.168232  | 0.391111  | -1.068926 |

Bicyclic by-product from *cis*-**2** (most abundant  
conformer; abundance: 66%)

# of imaginary frequencies: 0

Energy: -593.111007 Hartrees

Gibbs Free Energy: -592.941668 Hartrees

|   |           |           |           |
|---|-----------|-----------|-----------|
| C | 1.435532  | -0.292196 | 0.014990  |
| N | 0.289040  | -0.606789 | -0.842248 |
| C | -0.471167 | 0.649906  | -0.996177 |
| C | -1.961887 | 0.277244  | -0.922650 |
| C | -1.953616 | -0.971780 | -0.031426 |
| C | -0.676520 | -1.676568 | -0.489071 |
| C | -0.009855 | 1.515690  | 0.175220  |
| O | 1.063790  | 0.948447  | 0.748252  |
| O | -0.489043 | 2.562490  | 0.556883  |
| H | -2.845140 | -1.596965 | -0.168690 |
| H | -2.565320 | 1.096707  | -0.520651 |
| H | -2.342367 | 0.029288  | -1.918932 |
| H | -0.233889 | 1.181228  | -1.926838 |
| H | -0.889761 | -2.270361 | -1.386629 |
| H | -0.290329 | -2.354531 | 0.271245  |
| C | 1.786527  | -1.326023 | 1.075240  |
| H | 2.026789  | -2.287699 | 0.612353  |

Aldol Reaction Cycle with *trans*-4-Hydroxy-L-proline (*trans*-2) as a Catalyst

Table S2. Numbers of conformers of intermediates and transition structures from *trans*-2.

|                                           | # conformers | # conformers accounting for $\geq 95\%$ |
|-------------------------------------------|--------------|-----------------------------------------|
| <i>trans</i> -2                           | 15           | 2                                       |
| TS1 from <i>trans</i> -2                  | 4            | 4                                       |
| Hemiaminal from <i>trans</i> -2           | 86           | 10                                      |
| TS2 from <i>trans</i> -2                  | 6            | 6                                       |
| Iminium from <i>trans</i> -2              | 3            | 3                                       |
| TS3 from <i>trans</i> -2                  | 3            | 3                                       |
| Enamine from <i>trans</i> -2              | 21           | 16                                      |
| TS4 <sub>pro R</sub> from <i>trans</i> -2 | 9            | 3                                       |
| TS4 <sub>pro S</sub> from <i>trans</i> -2 | 9            | 3                                       |
| TS3a from <i>trans</i> -2                 | 3            | 3                                       |
| Bicyclic by-product from <i>trans</i> -2  | 3            | 3                                       |

*trans*-2 (most abundant conformer; abundance: 51%)

# of imaginary frequencies: 0

Energy: -476.378610 Hartrees

Gibbs Free Energy: -476.267294 Hartrees

|   |           |           |           |
|---|-----------|-----------|-----------|
| C | 1.807478  | -0.281035 | 0.553320  |
| C | 1.269180  | 1.150333  | 0.545800  |
| N | 0.185682  | 1.156097  | -0.466869 |
| C | -0.368345 | -0.222882 | -0.524287 |
| C | 0.519702  | -1.105584 | 0.397333  |
| C | -1.837187 | -0.201801 | -0.081818 |
| O | 2.662691  | -0.405743 | -0.585210 |
| O | -2.305579 | 1.029035  | 0.149625  |
| O | -2.516381 | -1.202168 | 0.046144  |
| H | 2.347853  | -0.522482 | 1.478468  |
| H | 0.854653  | 1.397445  | 1.529608  |
| H | 2.033007  | 1.889519  | 0.294532  |
| H | 0.574756  | 1.402501  | -1.372619 |
| H | -0.350600 | -0.595585 | -1.552782 |
| H | 0.046893  | -1.249702 | 1.374838  |
| H | 0.703899  | -2.095353 | -0.028839 |
| H | 2.928781  | -1.336711 | -0.653660 |
| H | -1.509835 | 1.614509  | -0.028023 |

TS1 from *trans*-2 (most abundant conformer; abundance: 36%)

# of imaginary frequencies: 1

Energy: -669.521088 Hartrees

Gibbs Free Energy: -669.333173 Hartrees

|   |           |           |           |
|---|-----------|-----------|-----------|
| C | 0.693959  | -1.146982 | -0.903029 |
| N | -0.029644 | -0.597862 | 0.274336  |
| C | 0.731255  | 0.654917  | 0.631551  |
| C | 2.212546  | 0.326609  | 0.251540  |
| C | 2.159574  | -1.024096 | -0.497166 |
| C | -1.898049 | -0.552164 | 0.019624  |
| C | 0.308769  | 1.994068  | -0.030230 |

|   |           |           |           |
|---|-----------|-----------|-----------|
| O | 1.020512  | 2.956573  | 0.233699  |
| O | -0.737073 | 2.089233  | -0.809092 |
| O | -2.058976 | 0.071638  | -1.101506 |
| H | 0.620223  | 0.815517  | 1.705438  |
| H | 2.843064  | 0.248706  | 1.141193  |
| H | 2.626015  | 1.118472  | -0.375672 |
| H | 2.834001  | -1.049159 | -1.361289 |
| H | 0.398951  | -2.178329 | -1.094491 |
| H | 0.445926  | -0.526864 | -1.768304 |
| H | 0.123581  | -1.252224 | 1.045032  |
| H | -1.366191 | 1.191854  | -0.957488 |
| C | -2.234971 | -2.038519 | -0.003445 |
| H | -1.871696 | -2.574296 | 0.878721  |
| H | -3.328009 | -2.122554 | -0.017285 |
| H | -1.854084 | -2.512550 | -0.910844 |
| C | -2.335710 | -0.152439 | 1.303897  |
| H | -3.430957 | 0.113534  | 1.338938  |
| H | -1.953073 | -0.335582 | 2.205630  |
| H | -2.043194 | 1.204583  | 1.303096  |
| O | 2.405685  | -2.132786 | 0.372899  |
| H | 3.297519  | -2.030969 | 0.742524  |

Hemiaminal from *trans*-2 (most abundant conformer; abundance: 42%)

# of imaginary frequencies: 0

Energy: -669.539715 Hartrees

Gibbs Free Energy: -669.347235 Hartrees

|   |           |           |           |
|---|-----------|-----------|-----------|
| C | 0.906226  | 0.176391  | -0.446586 |
| C | 0.939931  | 1.734379  | -0.406384 |
| C | -0.288093 | 2.125043  | 0.430835  |
| C | -0.465455 | 0.906713  | 1.332857  |
| N | -0.154491 | -0.277529 | 0.491645  |
| C | 2.255597  | -0.438491 | -0.050420 |
| H | 1.852781  | 2.092826  | 0.078706  |
| H | 0.910793  | 2.170146  | -1.408906 |
| H | -1.455838 | 0.849178  | 1.780183  |
| H | 0.265826  | 0.959985  | 2.148481  |

|   |           |           |           |
|---|-----------|-----------|-----------|
| H | -0.131507 | 3.048124  | 1.000377  |
| H | 0.674862  | -0.165697 | -1.457463 |
| C | -1.279177 | -1.011827 | -0.167263 |
| C | -2.448256 | -1.204982 | 0.810797  |
| H | -2.111178 | -1.604146 | 1.772950  |
| H | -2.989812 | -0.270682 | 0.984718  |
| H | -3.155336 | -1.913577 | 0.370070  |
| C | -0.766800 | -2.381793 | -0.628779 |
| H | -1.560018 | -2.896003 | -1.179235 |
| H | 0.095499  | -2.289171 | -1.295516 |
| H | -0.482305 | -2.997590 | 0.229589  |
| O | 3.307311  | -0.156079 | -0.589634 |
| O | 2.170647  | -1.327324 | 0.947165  |
| O | -1.734607 | -0.350244 | -1.346592 |
| O | -1.486173 | 2.247679  | -0.357117 |
| H | -1.342080 | 2.934173  | -1.029147 |
| H | 1.200115  | -1.312448 | 1.188893  |
| H | -1.871619 | 0.592745  | -1.106130 |

TS2 from *trans*-2 (most abundant conformer;  
abundance: 19%)

# of imaginary frequencies: 1

Energy: -669.516629 Hartrees

Gibbs Free Energy: -669.329596 Hartrees

|   |           |           |           |
|---|-----------|-----------|-----------|
| C | 0.490502  | 0.650729  | 0.775169  |
| C | 1.932780  | 0.134995  | 0.851549  |
| C | 2.033612  | -0.793539 | -0.366513 |
| C | 0.656810  | -1.472691 | -0.418228 |
| N | -0.244035 | -0.542970 | 0.292312  |
| C | 0.368821  | 1.928566  | -0.115645 |
| O | -0.579308 | 2.001303  | -0.986859 |
| O | 1.186133  | 2.828424  | 0.107956  |
| H | 2.648848  | 0.957634  | 0.838821  |
| H | 2.079456  | -0.459788 | 1.760105  |
| H | 0.708403  | -2.433952 | 0.105638  |
| H | 0.326217  | -1.653101 | -1.445674 |
| H | 2.182583  | -0.192968 | -1.275153 |
| H | 0.125322  | 0.929334  | 1.767935  |
| H | -1.434282 | 1.045712  | -1.154508 |
| C | -1.587617 | -0.664352 | 0.287722  |
| O | -2.211352 | 0.216584  | -1.211790 |
| H | -1.976242 | -0.331517 | -1.981232 |
| C | -2.358306 | 0.167868  | 1.292098  |
| H | -2.109334 | -0.169919 | 2.304444  |
| H | -2.123836 | 1.230147  | 1.207805  |
| H | -3.429481 | 0.038165  | 1.132867  |
| C | -2.151916 | -2.044622 | 0.032204  |
| H | -3.231170 | -1.983404 | -0.114363 |
| H | -1.705758 | -2.528540 | -0.839430 |
| H | -1.953487 | -2.674206 | 0.907708  |
| O | 3.029480  | -1.802008 | -0.274984 |
| H | 3.893270  | -1.368955 | -0.365873 |

Iminium from *trans*-2 (most abundant conformer;  
abundance: 38%)

# of imaginary frequencies: 0

Energy: -593.098012 Hartrees

Gibbs Free Energy: -592.934016 Hartrees

|   |           |           |           |
|---|-----------|-----------|-----------|
| C | -0.211963 | 0.706986  | -0.714323 |
| C | -1.670068 | 0.287687  | -0.888997 |
| C | -1.895046 | -0.686794 | 0.275411  |
| C | -0.568471 | -1.454408 | 0.356593  |
| N | 0.440740  | -0.531283 | -0.221301 |
| C | -0.008813 | 1.905291  | 0.325188  |
| O | -0.833379 | 2.832591  | 0.175928  |
| O | 0.953141  | 1.791269  | 1.115370  |
| H | -2.317619 | 1.164611  | -0.855054 |
| H | -1.826889 | -0.246979 | -1.833155 |
| H | -0.631270 | -2.353053 | -0.265961 |
| H | -0.285960 | -1.738662 | 1.371441  |
| H | -2.053706 | -0.123868 | 1.205023  |
| H | 0.247509  | 1.008142  | -1.657324 |
| C | 1.717189  | -0.752455 | -0.175132 |
| C | 2.721800  | 0.174845  | -0.775415 |
| H | 2.312353  | 1.125504  | -1.103802 |
| H | 3.503174  | 0.368990  | -0.033149 |
| H | 3.203402  | -0.338300 | -1.618278 |
| C | 2.236784  | -2.004321 | 0.467274  |
| H | 3.279086  | -2.169320 | 0.189772  |
| H | 2.189511  | -1.901633 | 1.559522  |
| H | 1.649706  | -2.884678 | 0.191266  |
| O | -2.932875 | -1.634636 | 0.083731  |
| H | -3.778053 | -1.166557 | 0.174986  |

TS3 from *trans*-2 (most abundant conformer;  
abundance: 35%)

# of imaginary frequencies: 1

Energy: -593.071756 Hartrees

Gibbs Free Energy: -592.910135 Hartrees

|   |           |           |           |
|---|-----------|-----------|-----------|
| C | 0.122396  | 0.693435  | 0.734510  |
| C | 1.634538  | 0.513430  | 0.858833  |
| C | 1.977890  | -0.455153 | -0.282763 |
| C | 0.793905  | -1.430592 | -0.288235 |
| N | -0.335772 | -0.629672 | 0.216856  |
| C | -0.294141 | 1.854352  | -0.226588 |
| O | -1.535506 | 1.864739  | -0.630757 |
| O | 0.533140  | 2.704787  | -0.542650 |
| H | 2.152913  | 1.470068  | 0.783186  |
| H | 1.885294  | 0.035507  | 1.811995  |
| H | 1.007372  | -2.264282 | 0.391963  |
| H | 0.580579  | -1.832457 | -1.280851 |
| H | 2.006246  | 0.095051  | -1.233316 |
| H | -0.341386 | 0.879677  | 1.709448  |
| C | -1.616384 | -0.996861 | 0.183831  |
| C | -2.621547 | -0.118357 | 0.657334  |
| H | -2.224692 | 0.957608  | -0.130936 |
| H | -3.638596 | -0.494915 | 0.594784  |
| C | -1.961448 | -2.284372 | -0.513279 |
| H | -3.038299 | -2.452916 | -0.486738 |
| H | -1.629915 | -2.279440 | -1.558002 |
| H | -1.466202 | -3.128551 | -0.018946 |
| H | -2.418206 | 0.411177  | 1.591075  |
| O | 3.170641  | -1.200387 | -0.100717 |
| H | 3.917842  | -0.597225 | -0.240532 |

Enamine from *trans*-2 (most abundant conformer;  
abundance: 12%)

# of imaginary frequencies: 0  
 Energy: -593.088367 Hartrees  
 Gibbs Free Energy: -592.923017 Hartrees

|   |           |           |           |
|---|-----------|-----------|-----------|
| C | -1.926773 | -1.173614 | -0.321134 |
| C | -1.605896 | 0.250547  | -0.777108 |
| N | -0.230376 | 0.515441  | -0.273540 |
| C | 0.332738  | -0.696477 | 0.330287  |
| C | -0.544161 | -1.831235 | -0.241519 |
| C | 1.798711  | -0.896108 | -0.058261 |
| O | -2.535188 | -1.072165 | 0.967144  |
| O | 2.157542  | -0.307006 | -1.212021 |
| O | 2.573472  | -1.579826 | 0.576939  |
| C | 0.108250  | 1.771894  | 0.274616  |
| C | 1.025351  | 1.929794  | 1.248041  |
| C | -0.561422 | 2.959915  | -0.374585 |
| H | -2.592483 | -1.686441 | -1.026919 |
| H | -1.638954 | 0.330417  | -1.868946 |
| H | -2.335100 | 0.945325  | -0.355746 |
| H | 0.268083  | -0.684917 | 1.425103  |
| H | -0.207700 | -2.109976 | -1.246965 |
| H | -0.525244 | -2.725363 | 0.386578  |
| H | -2.697417 | -1.974598 | 1.287242  |
| H | 1.384163  | 0.233180  | -1.496101 |
| H | 1.532536  | 1.106720  | 1.738356  |
| H | 1.302738  | 2.928223  | 1.566559  |
| H | -0.469051 | 2.917522  | -1.466575 |
| H | -1.631879 | 3.007483  | -0.142184 |
| H | -0.104462 | 3.888023  | -0.024127 |

TS4<sub>pro R</sub> from *trans*-2 (most abundant conformer;  
 abundance: 40%)  
 # of imaginary frequencies: 1  
 Energy: -1143.166140 Hartrees  
 Gibbs Free Energy: -1142.903509 Hartrees

|   |           |           |           |
|---|-----------|-----------|-----------|
| C | 3.241573  | 2.067345  | -0.091502 |
| C | 2.056481  | 1.400914  | -0.800761 |
| N | 2.399948  | -0.041203 | -0.814203 |
| C | 3.770689  | -0.275299 | -0.322175 |
| C | 4.415243  | 1.119401  | -0.384602 |
| C | 3.849649  | -0.881570 | 1.104718  |
| O | 2.750603  | -1.101192 | 1.797096  |
| O | 4.957301  | -1.153416 | 1.539061  |
| C | 1.600182  | -0.994121 | -1.294886 |
| C | 2.137319  | -2.394333 | -1.419912 |
| C | 0.224307  | -0.750011 | -1.476611 |
| H | 1.113075  | 1.568203  | -0.287550 |
| H | 1.991462  | 1.768523  | -1.831937 |
| H | 3.050592  | 2.101565  | 0.990089  |
| H | 5.247752  | 1.212843  | 0.315244  |
| H | 4.780530  | 1.316005  | -1.397969 |
| H | 4.294708  | -0.979784 | -0.971051 |
| H | 2.488450  | -2.779769 | -0.455778 |
| H | 1.360823  | -3.062867 | -1.793567 |
| H | 2.982608  | -2.426281 | -2.116812 |
| H | -0.328920 | -1.500476 | -2.032523 |
| H | -0.110162 | 0.267408  | -1.647694 |
| H | 1.831125  | -0.753731 | 1.428589  |
| O | 0.445908  | -0.284312 | 1.195648  |

|   |           |           |           |
|---|-----------|-----------|-----------|
| C | -0.314049 | -0.994233 | 0.437121  |
| C | -1.760432 | -0.593884 | 0.309532  |
| C | -2.176140 | 0.676374  | 0.735066  |
| C | -3.511335 | 1.051100  | 0.646340  |
| C | -4.432250 | 0.135634  | 0.131754  |
| C | -4.049175 | -1.139940 | -0.289272 |
| C | -2.709339 | -1.496484 | -0.195159 |
| N | -5.838775 | 0.520431  | 0.037985  |
| O | -6.161421 | 1.651556  | 0.412826  |
| O | -6.641089 | -0.302418 | -0.413016 |
| H | -0.189873 | -2.089914 | 0.445768  |
| H | -1.439715 | 1.357523  | 1.146938  |
| H | -3.846219 | 2.028144  | 0.971539  |
| H | -4.790937 | -1.828082 | -0.674418 |
| H | -2.396946 | -2.487747 | -0.512592 |
| O | 3.392447  | 3.377378  | -0.610800 |
| H | 4.027094  | 3.847710  | -0.047168 |

TS4<sub>pro S</sub> from *trans*-2 (most abundant conformer;  
 abundance: 40%)

# of imaginary frequencies: 1  
 Energy: -1143.164118 Hartrees  
 Gibbs Free Energy: -1142.901036 Hartrees

|   |           |           |           |
|---|-----------|-----------|-----------|
| C | 4.407698  | -0.365000 | -0.459608 |
| C | 3.258333  | -1.289511 | -0.038367 |
| N | 2.309699  | -0.398896 | 0.676224  |
| C | 2.864280  | 0.958848  | 0.835605  |
| C | 4.368754  | 0.759400  | 0.587451  |
| C | 2.266181  | 2.008138  | -0.137266 |
| O | 1.419693  | 1.631531  | -1.077010 |
| O | 2.614483  | 3.168895  | -0.004536 |
| C | 1.153313  | -0.806545 | 1.194467  |
| C | 0.369169  | 0.140586  | 2.059501  |
| C | 0.579618  | -2.026418 | 0.767502  |
| H | 2.768767  | -1.765032 | -0.884720 |
| H | 3.634451  | -2.048886 | 0.657084  |
| H | 4.202446  | 0.047039  | -1.457349 |
| H | 4.854008  | 1.683022  | 0.266300  |
| H | 4.851943  | 0.404616  | 1.503765  |
| H | 2.674830  | 1.336974  | 1.841578  |
| H | 0.942526  | 0.413157  | 2.952943  |
| H | 0.122696  | 1.067815  | 1.529110  |
| H | -0.562385 | -0.326268 | 2.379638  |
| H | -0.250369 | -2.394024 | 1.362295  |
| H | 1.251222  | -2.808622 | 0.428645  |
| H | 1.174032  | 0.621582  | -1.161204 |
| O | 0.704937  | -0.741905 | -1.601139 |
| C | -0.147679 | -1.476713 | -0.968656 |
| C | -1.519220 | -0.926293 | -0.637137 |
| C | -1.815364 | 0.430103  | -0.836593 |
| C | -3.088226 | 0.926956  | -0.572429 |
| C | -4.071124 | 0.048740  | -0.116046 |
| C | -3.812855 | -1.311449 | 0.074728  |
| C | -2.536356 | -1.787936 | -0.192052 |
| N | -5.410620 | 0.562656  | 0.161423  |
| O | -5.623940 | 1.765453  | -0.016303 |
| O | -6.268444 | -0.229413 | 0.562441  |
| H | -0.226134 | -2.524788 | -1.302619 |
| H | -1.045900 | 1.096100  | -1.209662 |

|   |           |           |           |
|---|-----------|-----------|-----------|
| H | -3.325822 | 1.972946  | -0.720837 |
| H | -4.601372 | -1.969181 | 0.417931  |
| H | -2.325550 | -2.845588 | -0.057475 |
| O | 5.605497  | -1.122024 | -0.472618 |
| H | 6.290105  | -0.584910 | -0.902231 |

TS3a from *trans*-**2** (most abundant conformer;  
abundance: 35%)  
# of imaginary frequencies: 1  
Energy: -593.090458 Hartrees  
Gibbs Free Energy: -592.923746 Hartrees

|   |           |           |           |
|---|-----------|-----------|-----------|
| H | -1.563993 | -2.705436 | -0.542297 |
| H | -2.664981 | -1.640173 | -1.431157 |
| H | -0.941983 | -1.652313 | -1.839366 |
| C | -2.590713 | -0.563909 | 1.023987  |
| H | -3.547074 | -0.390195 | 0.521247  |
| H | -2.642118 | -1.513979 | 1.564471  |
| H | -2.427485 | 0.235980  | 1.752938  |
| O | 3.351704  | -0.730371 | -0.388983 |
| H | 3.620199  | -0.969334 | 0.514248  |

|   |           |           |           |
|---|-----------|-----------|-----------|
| C | -1.495238 | -0.795630 | 0.148464  |
| N | -0.221597 | -0.642491 | 0.508037  |
| C | 0.180905  | 0.749473  | 0.790149  |
| C | 1.706313  | 0.731087  | 0.745149  |
| C | 2.014049  | -0.353485 | -0.300418 |
| C | 0.911444  | -1.397366 | -0.070532 |
| C | -0.486607 | 1.612153  | -0.357164 |
| O | -1.407456 | 1.009106  | -1.000653 |
| O | -0.070539 | 2.771069  | -0.509428 |
| H | 1.914340  | 0.068252  | -1.310330 |
| H | 2.095927  | 1.716324  | 0.480464  |
| H | 2.127314  | 0.426372  | 1.709769  |
| H | -0.198372 | 1.105496  | 1.750802  |
| H | 1.257916  | -2.133558 | 0.663786  |
| H | 0.629518  | -1.923866 | -0.981908 |
| C | -1.892496 | -1.906378 | -0.781210 |
| H | -1.684581 | -2.879078 | -0.319486 |
| H | -2.961704 | -1.853152 | -0.992522 |
| H | -1.344114 | -1.851792 | -1.724729 |
| C | -2.594222 | -0.252405 | 1.020049  |
| H | -3.437808 | 0.064976  | 0.405140  |
| H | -2.935809 | -1.074958 | 1.664445  |
| H | -2.283881 | 0.574308  | 1.657538  |
| O | 3.271903  | -0.993104 | -0.152097 |
| H | 3.956279  | -0.363146 | -0.428719 |

Bicyclic by-product from *trans*-**2** (most abundant  
conformer; abundance: 41%)  
# of imaginary frequencies: 0  
Energy: -593.107501 Hartrees  
Gibbs Free Energy: -592.939081 Hartrees

|   |           |           |           |
|---|-----------|-----------|-----------|
| C | -1.447726 | -0.617119 | 0.006667  |
| N | -0.159464 | -0.607326 | 0.696656  |
| C | 0.221586  | 0.816993  | 0.832995  |
| C | 1.734393  | 0.900465  | 0.594799  |
| C | 2.004591  | -0.293296 | -0.336764 |
| C | 1.009706  | -1.350694 | 0.181661  |
| C | -0.595106 | 1.525790  | -0.250388 |
| O | -1.504989 | 0.671381  | -0.747569 |
| O | -0.472142 | 2.666904  | -0.641061 |
| H | 1.754973  | -0.023194 | -1.369286 |
| H | 2.026907  | 1.864992  | 0.172314  |
| H | 2.273062  | 0.759762  | 1.539580  |
| H | -0.063140 | 1.240162  | 1.804751  |
| H | 1.478882  | -1.900623 | 1.011196  |
| H | 0.738453  | -2.084112 | -0.577262 |
| C | -1.657072 | -1.723826 | -1.015803 |



Aldol Reaction Cycle with *cis*-4-Hyp-Gly-OBn (*cis*-**6**) as a Catalyst

Table S3. Numbers of conformers of intermediates and transition structures from *cis*-**6**.

|                                                 | # conformers | # conformers accounting for $\geq 95\%$ |
|-------------------------------------------------|--------------|-----------------------------------------|
| <i>cis</i> - <b>6</b>                           | 69           | 21                                      |
| TS1 from <i>cis</i> - <b>6</b>                  | 6            | 6                                       |
| Hemiaminal from <i>cis</i> - <b>6</b>           | 95           | 17                                      |
| TS2 from <i>cis</i> - <b>6</b>                  | 13           | 5                                       |
| Iminium from <i>cis</i> - <b>6</b>              | 36           | 18                                      |
| TS3 from <i>cis</i> - <b>6</b>                  | 8            | 4                                       |
| Enamine from <i>cis</i> - <b>6</b>              | 47           | 14                                      |
| TS4 <sub>pro R</sub> from <i>cis</i> - <b>6</b> | 4            | 1                                       |
| TS4 <sub>pro S</sub> from <i>cis</i> - <b>6</b> | 8            | 1                                       |
| TS3a from <i>cis</i> - <b>6</b>                 | 7            | 4                                       |
| Bicyclic by-product from <i>cis</i> - <b>6</b>  | 32           | 18                                      |

*cis*-**6** (most abundant conformer; abundance: 29%)

# of imaginary frequencies: 0

Energy: -954.755276 Hartrees

Gibbs Free Energy: -954.501423 Hartrees

|   |          |           |           |
|---|----------|-----------|-----------|
| H | 6.469477 | -0.880652 | -1.941630 |
| H | 4.080711 | -1.488796 | -1.675742 |
| H | 2.155629 | -1.766818 | -0.128432 |
| H | 2.101570 | -0.884345 | 1.410581  |

|   |           |           |           |
|---|-----------|-----------|-----------|
| C | -4.272290 | -1.353943 | 0.742596  |
| C | -4.686476 | -1.365266 | -0.737152 |
| N | -4.208410 | -0.069105 | -1.267009 |
| C | -4.098502 | 0.906019  | -0.158436 |
| C | -4.486048 | 0.122770  | 1.122054  |
| C | -2.675282 | 1.484041  | -0.037992 |
| O | -2.950483 | -1.828573 | 0.977000  |
| N | -1.824602 | 1.072087  | -1.010941 |
| O | -2.366246 | 2.255822  | 0.872076  |
| C | -0.404586 | 1.269954  | -0.923133 |
| C | 0.289377  | 0.089747  | -0.243923 |
| O | -0.286519 | -0.857467 | 0.261430  |
| O | 1.616073  | 0.236646  | -0.273325 |
| C | 3.856822  | -0.470392 | 0.211764  |
| C | 4.505898  | 0.296334  | 1.188345  |
| C | 5.850639  | 0.640046  | 1.041043  |
| C | 6.559784  | 0.218815  | -0.086841 |
| C | 5.920624  | -0.547208 | -1.065290 |
| C | 4.575910  | -0.889664 | -0.915325 |
| C | 2.403739  | -0.822607 | 0.362286  |
| H | -4.914540 | -2.015438 | 1.330618  |
| H | -4.229556 | -2.203828 | -1.273275 |
| H | -5.779278 | -1.464149 | -0.813779 |
| H | -4.806970 | 0.276410  | -2.009966 |
| H | -4.765102 | 1.764430  | -0.301229 |
| H | -3.901162 | 0.421617  | 1.994700  |
| H | -5.544666 | 0.290110  | 1.346798  |
| H | -2.290469 | -1.282360 | 0.510023  |
| H | -2.218911 | 0.363901  | -1.628335 |
| H | 0.035836  | 1.418980  | -1.913621 |
| H | -0.210015 | 2.170119  | -0.332097 |
| H | 3.955879  | 0.621944  | 2.067974  |
| H | 6.344772  | 1.231974  | 1.806443  |
| H | 7.607625  | 0.482726  | -0.200795 |

TS1 from *cis*-**6** (most abundant conformer; abundance: 37%)

# of imaginary frequencies: 1

Energy: -1147.857625 Hartrees

Gibbs Free Energy: -1147.524478 Hartrees

|   |          |           |           |
|---|----------|-----------|-----------|
| C | 2.857754 | -0.196291 | -0.568724 |
| C | 4.086753 | -0.528673 | 0.285905  |
| C | 3.614342 | -0.266893 | 1.721470  |
| C | 2.770224 | 1.003986  | 1.543755  |
| N | 2.116474 | 0.878635  | 0.200998  |
| C | 1.924698 | -1.411357 | -0.779233 |
| H | 4.432952 | -1.552857 | 0.134464  |
| H | 4.902380 | 0.155596  | 0.032704  |
| H | 3.415349 | 1.887804  | 1.548739  |
| H | 2.012799 | 1.106338  | 2.322163  |
| H | 4.448554 | -0.072790 | 2.403992  |
| H | 3.142549 | 0.183073  | -1.549245 |
| H | 0.646387 | -0.193510 | -1.773413 |
| C | 1.634066 | 2.151238  | -0.613330 |
| H | 0.883718 | 0.777350  | -0.010443 |
| C | 2.509876 | 2.536869  | -1.803079 |
| H | 3.546370 | 2.734116  | -1.507601 |
| H | 2.492556 | 1.776259  | -2.587690 |
| H | 2.105574 | 3.456627  | -2.238764 |
| C | 1.469004 | 3.328018  | 0.352771  |
| H | 0.904434 | 4.103769  | -0.173986 |
| H | 0.890703 | 3.034186  | 1.233498  |
| H | 2.423069 | 3.759925  | 0.673462  |
| O | 2.145323 | -2.505529 | -0.242947 |
| O | 0.407962 | 1.579107  | -0.954103 |
| O | 2.856661 | -1.342772 | 2.263873  |
| H | 2.597832 | -1.930637 | 1.525639  |
| N | 0.880792 | -1.180809 | -1.606145 |

|   |           |           |           |
|---|-----------|-----------|-----------|
| C | -0.168946 | -2.162388 | -1.778131 |
| C | -1.315579 | -2.101770 | -0.767391 |
| O | -2.313804 | -2.783741 | -0.877377 |
| O | -1.081582 | -1.237513 | 0.230888  |
| C | -3.211497 | -0.117893 | 0.756455  |
| C | -2.880132 | 1.109069  | 0.161730  |
| C | -3.889382 | 1.993393  | -0.222960 |
| C | -5.233178 | 1.670576  | -0.011072 |
| C | -5.566227 | 0.451340  | 0.581749  |
| C | -4.558527 | -0.440372 | 0.957314  |
| C | -2.133557 | -1.069939 | 1.220796  |
| H | -0.611143 | -2.057085 | -2.772677 |
| H | 0.268121  | -3.162274 | -1.715050 |
| H | -1.837974 | 1.367265  | -0.014581 |
| H | -3.625809 | 2.940146  | -0.687435 |
| H | -6.014873 | 2.363969  | -0.309578 |
| H | -6.608044 | 0.188451  | 0.744097  |
| H | -4.821603 | -1.393889 | 1.409172  |
| H | -1.599566 | -0.677968 | 2.089825  |
| H | -2.549834 | -2.048514 | 1.467914  |

Hemiaminal from *cis*-**6** (most abundant conformer;  
abundance: 38%)  
# of imaginary frequencies: 0  
Energy: -1147.919087 Hartrees  
Gibbs Free Energy: -1147.582728 Hartrees

|   |           |           |           |
|---|-----------|-----------|-----------|
| C | 3.156534  | 0.485028  | 0.906743  |
| C | 4.151230  | 1.657815  | 0.793333  |
| C | 4.280875  | 1.900161  | -0.720936 |
| C | 4.194284  | 0.469298  | -1.274044 |
| N | 3.218909  | -0.211565 | -0.402436 |
| C | 1.706369  | 0.958403  | 1.088436  |
| H | 5.117753  | 1.344337  | 1.201241  |
| H | 3.828520  | 2.554553  | 1.328710  |
| H | 5.191305  | -0.002101 | -1.237704 |
| H | 3.860660  | 0.475179  | -2.316298 |
| H | 5.239705  | 2.359132  | -0.982107 |
| H | 3.422154  | -0.179568 | 1.735563  |
| C | 3.226906  | -1.687043 | -0.372426 |
| C | 4.464257  | -2.294926 | 0.307724  |
| H | 4.396484  | -3.387301 | 0.296864  |
| H | 5.380689  | -2.004940 | -0.215198 |
| H | 4.540901  | -1.973529 | 1.351014  |
| C | 3.081213  | -2.216587 | -1.806618 |
| H | 3.960256  | -1.995973 | -2.420005 |
| H | 2.203821  | -1.768236 | -2.285677 |
| H | 2.949717  | -3.302209 | -1.775095 |
| O | 1.267327  | 1.983718  | 0.548228  |
| O | 2.115341  | -2.121299 | 0.412186  |
| O | 3.271451  | 2.758348  | -1.235451 |
| H | 2.451993  | 2.561525  | -0.729243 |
| H | 1.298588  | -1.761611 | 0.006762  |
| N | 0.923394  | 0.159534  | 1.858328  |
| H | 1.299554  | -0.760352 | 2.061262  |
| C | -0.514670 | 0.294011  | 1.836584  |
| C | -1.140050 | -0.366117 | 0.606343  |
| O | -0.538158 | -1.051520 | -0.203279 |
| O | -2.445068 | -0.102486 | 0.543009  |
| C | -4.616160 | -0.270905 | -0.465486 |

|   |           |           |           |
|---|-----------|-----------|-----------|
| C | -5.041899 | 0.937471  | -1.033222 |
| C | -6.370994 | 1.345852  | -0.914490 |
| C | -7.288768 | 0.546867  | -0.227116 |
| C | -6.873262 | -0.660411 | 0.340181  |
| C | -5.542833 | -1.065907 | 0.221207  |
| C | -3.180287 | -0.698699 | -0.577149 |
| H | -0.781868 | 1.352600  | 1.840095  |
| H | -4.329594 | 1.557810  | -1.571887 |
| H | -6.691027 | 2.283139  | -1.361068 |
| H | -8.324751 | 0.862084  | -0.137843 |
| H | -7.584341 | -1.286851 | 0.871488  |
| H | -5.221225 | -2.006984 | 0.660783  |
| H | -3.066948 | -1.783588 | -0.514578 |
| H | -2.716955 | -0.351341 | -1.503599 |
| H | -0.945132 | -0.161512 | 2.733347  |

TS2 from *cis*-**6** (most abundant conformer;  
abundance: 50%)  
# of imaginary frequencies: 1  
Energy: -1147.878413 Hartrees  
Gibbs Free Energy: -1147.549060 Hartrees

|   |           |           |           |
|---|-----------|-----------|-----------|
| C | 3.106209  | 0.700237  | 1.099468  |
| C | 3.231510  | 2.181760  | 0.703107  |
| C | 3.173333  | 2.168529  | -0.835186 |
| C | 3.936255  | 0.877141  | -1.196857 |
| N | 3.854249  | 0.021532  | 0.011699  |
| C | 1.616089  | 0.297639  | 1.241228  |
| O | 0.952070  | 0.926604  | 2.090056  |
| H | 2.437807  | 2.783962  | 1.147005  |
| H | 4.199785  | 2.575028  | 1.032005  |
| H | 4.986350  | 1.082889  | -1.426767 |
| H | 3.475805  | 0.385469  | -2.058632 |
| H | 3.687045  | 3.035019  | -1.259041 |
| H | 3.595481  | 0.504366  | 2.056589  |
| H | 1.952182  | -1.564141 | -0.220328 |
| C | 4.263823  | -1.241247 | 0.038461  |
| O | 2.677776  | -2.338724 | -0.663634 |
| H | 2.663486  | -2.188822 | -1.624254 |
| C | 4.298141  | -1.959923 | 1.362740  |
| H | 5.114269  | -1.548935 | 1.970625  |
| H | 3.362956  | -1.850498 | 1.913143  |
| H | 4.485032  | -3.021472 | 1.201289  |
| C | 5.252485  | -1.700685 | -1.001835 |
| H | 5.308762  | -2.789267 | -1.005989 |
| H | 5.005230  | -1.355369 | -2.006929 |
| H | 6.241800  | -1.301205 | -0.741546 |
| O | 1.862872  | 2.223262  | -1.374941 |
| H | 1.296237  | 1.506274  | -1.025642 |
| N | 1.172317  | -0.661164 | 0.424756  |
| C | -0.234289 | -0.962187 | 0.533468  |
| C | -1.106884 | 0.058657  | -0.191556 |
| O | -0.700674 | 0.981175  | -0.876011 |
| O | -2.409826 | -0.199095 | 0.004307  |
| C | -4.744379 | 0.218553  | -0.341038 |
| C | -5.426306 | 0.724277  | 0.773307  |
| C | -6.708947 | 0.270643  | 1.086061  |
| C | -7.322779 | -0.695774 | 0.285143  |
| C | -6.650548 | -1.205339 | -0.829026 |
| C | -5.368491 | -0.749251 | -1.139347 |

|   |           |           |           |
|---|-----------|-----------|-----------|
| C | -3.354329 | 0.691755  | -0.664633 |
| H | -0.435410 | -1.941340 | 0.080627  |
| H | -0.583148 | -1.005900 | 1.573566  |
| H | -4.950936 | 1.478490  | 1.395880  |
| H | -7.229287 | 0.672995  | 1.950850  |
| H | -8.322435 | -1.047285 | 0.525589  |
| H | -7.125625 | -1.953658 | -1.457407 |
| H | -4.847983 | -1.144001 | -2.008686 |
| H | -3.151192 | 0.660894  | -1.738265 |
| H | -3.175266 | 1.709446  | -0.308118 |

Iminium from *cis*-**6** (most abundant conformer;  
abundance: 21%)

# of imaginary frequencies: 0

Energy: -1071.456944 Hartrees

Gibbs Free Energy: -1071.151068 Hartrees

|   |           |           |           |
|---|-----------|-----------|-----------|
| C | -3.262574 | -0.335834 | 1.198491  |
| C | -4.172573 | -1.562770 | 1.010148  |
| C | -4.510063 | -1.597935 | -0.496234 |
| C | -4.661059 | -0.100961 | -0.824795 |
| N | -3.719517 | 0.589876  | 0.100731  |
| C | -1.732031 | -0.616537 | 1.085903  |
| O | -1.013602 | -0.252415 | 2.050308  |
| H | -3.684051 | -2.484626 | 1.332256  |
| H | -5.091304 | -1.436672 | 1.593559  |
| H | -5.671349 | 0.268199  | -0.617187 |
| H | -4.400961 | 0.113486  | -1.861746 |
| H | -5.460217 | -2.109690 | -0.678432 |
| H | -3.438728 | 0.161897  | 2.152030  |
| C | -3.350480 | 1.824382  | -0.043475 |
| C | -2.378296 | 2.479787  | 0.879218  |
| H | -1.467445 | 2.687281  | 0.301814  |
| H | -2.785764 | 3.443768  | 1.201760  |
| H | -2.094357 | 1.871368  | 1.736290  |
| C | -3.878702 | 2.630018  | -1.193062 |
| H | -3.603536 | 3.679248  | -1.080931 |
| H | -3.450121 | 2.261278  | -2.133705 |
| H | -4.967310 | 2.550795  | -1.273958 |
| O | -3.531968 | -2.226562 | -1.286480 |
| H | -2.638394 | -1.888185 | -0.948776 |
| N | -1.374491 | -1.199769 | -0.045002 |
| C | 0.050088  | -1.397394 | -0.175465 |
| C | 0.829321  | -0.102360 | -0.413103 |
| O | 0.366655  | 0.964526  | -0.767630 |
| O | 2.151228  | -0.305713 | -0.218592 |
| C | 4.439069  | 0.403730  | -0.237574 |
| C | 5.214959  | -0.102802 | -1.288316 |
| C | 6.527300  | -0.522848 | -1.063910 |
| C | 7.077666  | -0.440563 | 0.217666  |
| C | 6.311823  | 0.064056  | 1.272112  |
| C | 5.000450  | 0.483976  | 1.043846  |
| C | 3.018016  | 0.835854  | -0.476479 |
| H | 0.503920  | -1.883922 | 0.699567  |
| H | 0.254969  | -2.044089 | -1.039877 |
| H | 4.789242  | -0.165072 | -2.287050 |
| H | 7.119884  | -0.910241 | -1.888171 |
| H | 8.100030  | -0.764116 | 0.393214  |
| H | 6.736696  | 0.134177  | 2.269711  |
| H | 4.407139  | 0.879751  | 1.864781  |

|   |          |          |           |
|---|----------|----------|-----------|
| H | 2.722655 | 1.649926 | 0.191377  |
| H | 2.861074 | 1.165206 | -1.507305 |

TS3 from *cis*-**6** (most abundant conformer;  
abundance: 59%)

# of imaginary frequencies: 1

Energy: -1071.436258 Hartrees

Gibbs Free Energy: -1071.131413 Hartrees

|   |           |           |           |
|---|-----------|-----------|-----------|
| C | -3.399538 | 0.392192  | -1.027267 |
| C | -4.045576 | 1.759254  | -0.789687 |
| C | -3.843169 | 2.035058  | 0.714025  |
| C | -3.976954 | 0.631866  | 1.347305  |
| N | -3.639873 | -0.320460 | 0.263896  |
| C | -1.863689 | 0.432061  | -1.256543 |
| O | -1.213775 | 1.484495  | -1.036229 |
| H | -3.598927 | 2.541483  | -1.406329 |
| H | -5.114293 | 1.698467  | -1.019138 |
| H | -4.999771 | 0.437552  | 1.689467  |
| H | -3.294309 | 0.527123  | 2.193784  |
| H | -4.620331 | 2.694351  | 1.111814  |
| H | -3.882684 | -0.156913 | -1.838741 |
| C | -3.491613 | -1.633309 | 0.411370  |
| C | -3.171157 | -2.451953 | -0.712643 |
| H | -2.096120 | -1.801758 | -1.192776 |
| H | -3.074575 | -3.511595 | -0.488109 |
| C | -3.528772 | -2.188228 | 1.808024  |
| H | -3.396330 | -3.270327 | 1.791781  |
| H | -2.742586 | -1.743219 | 2.429325  |
| H | -4.488805 | -1.962756 | 2.287206  |
| H | -3.766466 | -2.270261 | -1.612213 |
| O | -2.599176 | 2.645736  | 1.004891  |
| H | -1.958748 | 2.321355  | 0.325674  |
| N | -1.345808 | -0.737995 | -1.645296 |
| C | 0.100347  | -0.803769 | -1.681317 |
| C | 0.744366  | -0.730607 | -0.296919 |
| O | 0.177149  | -0.932365 | 0.758348  |
| O | 2.058488  | -0.452740 | -0.400232 |
| C | 4.234018  | -0.075169 | 0.531163  |
| C | 4.635283  | 1.262517  | 0.414516  |
| C | 5.956218  | 1.581802  | 0.097061  |
| C | 6.892038  | 0.563680  | -0.105578 |
| C | 6.501710  | -0.772722 | 0.010340  |
| C | 5.179020  | -1.088697 | 0.326554  |
| C | 2.804967  | -0.416275 | 0.852413  |
| H | 0.401108  | -1.760580 | -2.126781 |
| H | 0.534699  | -0.010858 | -2.300494 |
| H | 3.909200  | 2.055826  | 0.575761  |
| H | 6.256055  | 2.622715  | 0.012324  |
| H | 7.921790  | 0.811187  | -0.348603 |
| H | 7.226397  | -1.567795 | -0.142169 |
| H | 4.877334  | -2.129357 | 0.418875  |
| H | 2.717629  | -1.393600 | 1.334775  |
| H | 2.343018  | 0.330930  | 1.503231  |

Enamine from *cis*-**6** (most abundant conformer;  
abundance: 35%)

# of imaginary frequencies: 0

Energy: -1071.471141 Hartrees

Gibbs Free Energy: -1071.163645 Hartrees

|   |           |           |           |
|---|-----------|-----------|-----------|
| C | -4.907526 | -1.860902 | 0.012788  |
| C | -5.484581 | -0.454617 | -0.192909 |
| N | -4.310147 | 0.414533  | -0.042166 |
| C | -3.251330 | -0.227111 | 0.731205  |
| C | -3.848702 | -1.609778 | 1.102105  |
| C | -1.969836 | -0.402823 | -0.106666 |
| N | -0.815274 | -0.066389 | 0.497058  |
| O | -1.998405 | -0.876903 | -1.252203 |
| C | -4.331143 | 1.789108  | -0.242430 |
| C | -5.566396 | 2.329315  | -0.925768 |
| C | -3.322046 | 2.616857  | 0.111783  |
| H | -5.931628 | -0.360625 | -1.186025 |
| H | -6.260423 | -0.237900 | 0.558938  |
| H | -5.678145 | -2.562040 | 0.344721  |
| H | -3.102459 | -2.407563 | 1.143083  |
| H | -4.329509 | -1.540188 | 2.083131  |
| H | -3.019584 | 0.357687  | 1.632466  |
| H | -5.697986 | 1.889104  | -1.921818 |
| H | -6.476588 | 2.110805  | -0.354338 |
| H | -5.488886 | 3.412620  | -1.040619 |
| H | -3.400546 | 3.677526  | -0.096818 |
| H | -2.405796 | 2.278580  | 0.580429  |
| H | -0.803123 | 0.326772  | 1.431707  |
| O | -4.358018 | -2.402596 | -1.179513 |
| H | -3.577099 | -1.850110 | -1.409643 |
| C | 0.474537  | -0.251873 | -0.133964 |
| H | 0.638324  | -1.302944 | -0.399658 |
| C | 1.562823  | 0.200917  | 0.823802  |
| O | 1.347287  | 0.645501  | 1.935858  |
| O | 2.770474  | 0.044567  | 0.279432  |
| C | 3.910281  | 0.446338  | 1.108560  |
| H | 3.876614  | -0.137718 | 2.031452  |
| H | 3.788530  | 1.502932  | 1.358815  |
| C | 5.164578  | 0.191140  | 0.321681  |
| C | 7.485238  | -0.298915 | -1.175708 |
| C | 5.702098  | 1.189635  | -0.501010 |
| C | 5.801978  | -1.054814 | 0.388083  |
| C | 6.956453  | -1.300140 | -0.356755 |
| C | 6.856842  | 0.947059  | -1.246652 |
| H | 5.215625  | 2.160625  | -0.554619 |
| H | 5.393196  | -1.833261 | 1.027788  |
| H | 7.444505  | -2.268836 | -0.295255 |
| H | 7.267177  | 1.729690  | -1.878685 |
| H | 8.386086  | -0.487676 | -1.753154 |
| H | 0.549351  | 0.324574  | -1.063588 |

TS4<sub>pro R</sub> from *cis*-**6** (most abundant conformer;  
abundance: 100%)

# of imaginary frequencies: 1

Energy: -1621.544021 Hartrees

Gibbs Free Energy: -1621.136323 Hartrees

|   |           |           |           |
|---|-----------|-----------|-----------|
| C | -1.528412 | -4.082294 | -1.060222 |
| C | -2.068638 | -3.393306 | 0.185843  |
| N | -0.841634 | -2.934199 | 0.884731  |
| C | 0.312325  | -3.803814 | 0.539713  |
| C | -0.272976 | -4.785882 | -0.512151 |
| C | 1.570042  | -3.102571 | -0.017817 |
| N | 1.424610  | -1.904497 | -0.617354 |

|   |           |           |           |
|---|-----------|-----------|-----------|
| O | 2.641985  | -3.709090 | 0.053569  |
| C | -0.825732 | -1.948532 | 1.782197  |
| C | 0.420437  | -1.710182 | 2.589138  |
| C | -1.888175 | -1.015082 | 1.831692  |
| H | -2.725102 | -2.563120 | -0.057939 |
| H | -2.602577 | -4.098061 | 0.834514  |
| H | -2.245534 | -4.810279 | -1.453930 |
| H | 0.445045  | -5.018526 | -1.300817 |
| H | -0.559380 | -5.722810 | -0.023697 |
| H | 0.651893  | -4.342724 | 1.427806  |
| H | 1.214394  | -1.252092 | 1.986108  |
| H | 0.197787  | -1.043252 | 3.423665  |
| H | 0.812401  | -2.649632 | 2.992811  |
| H | -1.869476 | -0.325470 | 2.670258  |
| H | -2.887406 | -1.346269 | 1.574537  |
| H | 0.509894  | -1.422065 | -0.645293 |
| O | -1.059170 | -0.657819 | -0.764341 |
| C | -1.432228 | 0.079265  | 0.223410  |
| C | -2.729686 | 0.840897  | 0.102636  |
| C | -3.642622 | 0.511630  | -0.910113 |
| C | -4.833138 | 1.215090  | -1.048435 |
| C | -5.099539 | 2.263403  | -0.164698 |
| C | -4.203029 | 2.623209  | 0.844707  |
| C | -3.019279 | 1.906398  | 0.969498  |
| N | -6.346822 | 3.010345  | -0.304628 |
| O | -7.128108 | 2.681365  | -1.202356 |
| O | -6.565233 | 3.936723  | 0.482043  |
| H | -0.656952 | 0.672736  | 0.736051  |
| H | -3.397949 | -0.293753 | -1.594133 |
| H | -5.546178 | 0.970674  | -1.825866 |
| H | -4.436385 | 3.447989  | 1.506129  |
| H | -2.309368 | 2.178886  | 1.745939  |
| O | -1.229399 | -3.149104 | -2.089478 |
| H | -1.260497 | -2.245126 | -1.708827 |
| C | 2.564494  | -1.252431 | -1.212569 |
| H | 2.213771  | -0.519823 | -1.946219 |
| H | 3.189364  | -1.978052 | -1.741181 |
| C | 3.442524  | -0.519518 | -0.198593 |
| O | 3.177972  | -0.355845 | 0.975846  |
| O | 4.552408  | -0.070585 | -0.804848 |
| C | 5.503144  | 0.694454  | 0.002994  |
| H | 6.468096  | 0.472033  | -0.455048 |
| H | 5.481137  | 0.304242  | 1.021283  |
| C | 5.200852  | 2.170756  | -0.038535 |
| C | 4.625164  | 4.915992  | -0.142265 |
| C | 5.682464  | 2.959205  | -1.092620 |
| C | 4.428288  | 2.772731  | 0.964235  |
| C | 4.142936  | 4.138380  | 0.913640  |
| C | 5.395916  | 4.324025  | -1.146503 |
| H | 6.287996  | 2.501700  | -1.871532 |
| H | 4.048785  | 2.165274  | 1.780695  |
| H | 3.546601  | 4.595254  | 1.698733  |
| H | 5.777353  | 4.925289  | -1.967217 |
| H | 4.404781  | 5.979331  | -0.180649 |

TS4<sub>pro S</sub> from *cis*-**6** (most abundant conformer;  
abundance: 100%)

# of imaginary frequencies: 1

Energy: -1621.538348 Hartrees

Gibbs Free Energy: -1621.128521 Hartrees

|   |           |           |           |
|---|-----------|-----------|-----------|
| C | 5.033389  | -0.942121 | 0.583138  |
| C | 3.864097  | -1.899277 | 0.833976  |
| N | 2.698703  | -1.018421 | 1.144005  |
| C | 3.090635  | 0.403487  | 1.082018  |
| C | 4.610765  | 0.349060  | 1.301397  |
| C | 2.721866  | 1.103530  | -0.245881 |
| N | 2.071203  | 0.391857  | -1.182200 |
| O | 3.021221  | 2.295419  | -0.373009 |
| C | 1.517707  | -1.463858 | 1.532714  |
| C | 0.469506  | -0.482869 | 1.973500  |
| C | 1.181128  | -2.847296 | 1.342036  |
| H | 3.642820  | -2.505833 | -0.042570 |
| H | 4.053125  | -2.539553 | 1.700371  |
| H | 5.108069  | 1.239168  | 0.910549  |
| H | 4.825085  | 0.272207  | 2.372523  |
| H | 2.593363  | 0.966859  | 1.873316  |
| H | -0.453170 | -1.005622 | 2.225071  |
| H | 0.804280  | 0.070029  | 2.859023  |
| H | 0.250577  | 0.249255  | 1.187700  |
| H | 0.357178  | -3.185504 | 1.966374  |
| H | 2.021989  | -3.535785 | 1.380213  |
| H | 1.860275  | -0.623335 | -1.079654 |
| O | 1.486432  | -2.329233 | -1.180323 |
| C | 0.676121  | -2.968642 | -0.385845 |
| C | -0.805679 | -2.579091 | -0.412453 |
| C | -1.216992 | -1.461347 | -1.148324 |
| C | -2.555890 | -1.089429 | -1.204902 |
| C | -3.495394 | -1.862804 | -0.522716 |
| C | -3.124381 | -3.004446 | 0.194939  |
| C | -1.780527 | -3.353909 | 0.239743  |
| N | -4.899322 | -1.469346 | -0.559762 |
| O | -5.200101 | -0.420624 | -1.141349 |
| O | -5.727771 | -2.198075 | -0.005110 |
| H | 0.729868  | -4.078544 | -0.427704 |
| H | -0.469993 | -0.884922 | -1.678324 |
| H | -2.876731 | -0.223130 | -1.769366 |
| H | -3.878795 | -3.593312 | 0.701617  |
| H | -1.484508 | -4.243594 | 0.790133  |
| O | 5.139608  | -0.763039 | -0.828176 |
| H | 5.876934  | -0.152649 | -0.992167 |
| C | 1.728060  | 1.033226  | -2.431091 |
| H | 1.360062  | 0.263480  | -3.117399 |
| C | 0.658407  | 2.120951  | -2.340710 |
| O | 0.543384  | 2.999411  | -3.172413 |
| O | -0.154703 | 1.965492  | -1.284577 |
| C | -1.202551 | 2.966890  | -1.118586 |
| H | -1.989223 | 2.765361  | -1.850774 |
| H | -0.770003 | 3.946062  | -1.338242 |
| C | -1.714617 | 2.878562  | 0.293185  |
| C | -2.650293 | 2.729202  | 2.935032  |
| C | -2.981681 | 2.350886  | 0.567731  |
| C | -0.917896 | 3.329150  | 1.356449  |
| C | -1.380441 | 3.252355  | 2.669855  |
| C | -3.449507 | 2.279208  | 1.882675  |
| H | -3.606207 | 1.991125  | -0.246313 |
| H | 0.069176  | 3.736158  | 1.150090  |
| H | -0.755518 | 3.606003  | 3.485325  |
| H | -4.436117 | 1.870486  | 2.082667  |
| H | -3.013653 | 2.674531  | 3.957577  |

|   |          |           |           |
|---|----------|-----------|-----------|
| H | 2.602643 | 1.500622  | -2.893757 |
| H | 5.964828 | -1.351514 | 0.991800  |

TS3a from *cis*-**6** (most abundant conformer;  
abundance: 84%)  
# of imaginary frequencies: 1  
Energy: -1071.444335 Hartrees  
Gibbs Free Energy: -1071.135149 Hartrees

|   |           |           |           |
|---|-----------|-----------|-----------|
| C | -3.335354 | 1.734494  | -0.049738 |
| N | -3.901836 | 0.545261  | -0.154027 |
| C | -3.686106 | -0.414367 | 0.956481  |
| C | -4.100740 | -1.765915 | 0.364228  |
| C | -3.732213 | -1.646630 | -1.126700 |
| C | -4.071275 | -0.178575 | -1.439455 |
| C | -2.167106 | -0.378059 | 1.324718  |
| O | -1.781423 | -1.194095 | 2.195128  |
| H | -4.337753 | -2.314913 | -1.744181 |
| H | -3.576291 | -2.586729 | 0.856399  |
| H | -5.180103 | -1.920616 | 0.473037  |
| H | -4.275449 | -0.152209 | 1.837936  |
| H | -5.112670 | -0.066455 | -1.759778 |
| H | -3.421701 | 0.219235  | -2.218987 |
| C | -3.020334 | 2.533662  | -1.282544 |
| H | -3.934878 | 2.722979  | -1.857157 |
| H | -2.584148 | 3.495402  | -1.008211 |
| H | -2.317659 | 2.000726  | -1.927610 |
| C | -3.405476 | 2.511665  | 1.234165  |
| H | -2.488218 | 3.086286  | 1.374229  |
| H | -4.234285 | 3.228141  | 1.133339  |
| H | -3.584630 | 1.898721  | 2.115562  |
| O | -2.385186 | -1.983351 | -1.420132 |
| H | -1.763650 | -1.356229 | -0.996736 |
| N | -1.484914 | 0.521313  | 0.632915  |
| C | -0.082797 | 0.622265  | 0.929328  |
| C | 0.760283  | -0.203690 | -0.037546 |
| O | 0.328181  | -1.012443 | -0.840037 |
| O | 2.070052  | 0.059255  | 0.114940  |
| C | 4.388248  | -0.291766 | -0.383716 |
| C | 5.067924  | -0.907133 | 0.676148  |
| C | 6.364145  | -0.513467 | 1.011246  |
| C | 6.995822  | 0.500995  | 0.286515  |
| C | 6.326821  | 1.118923  | -0.772893 |
| C | 5.029483  | 0.723670  | -1.104662 |
| C | 2.983975  | -0.704288 | -0.728989 |
| H | 0.264201  | 1.661590  | 0.864649  |
| H | 0.159949  | 0.259979  | 1.941865  |
| H | 4.579218  | -1.699445 | 1.238182  |
| H | 6.882202  | -1.000155 | 1.833016  |
| H | 8.006673  | 0.805368  | 0.543865  |
| H | 6.815213  | 1.905134  | -1.342008 |
| H | 4.511016  | 1.203635  | -1.931301 |
| H | 2.742853  | -0.494246 | -1.774305 |
| H | 2.812565  | -1.767846 | -0.542720 |

Bicyclic by-product from *cis*-**6** (most abundant  
conformer; abundance: 14%)  
# of imaginary frequencies: 0  
Energy: -1071.480691 Hartrees  
Gibbs Free Energy: -1071.169596 Hartrees

|   |           |           |           |
|---|-----------|-----------|-----------|
| C | -2.280388 | 1.580306  | -0.019843 |
| N | -3.564428 | 0.856066  | -0.119256 |
| C | -3.637690 | -0.012438 | 1.088556  |
| C | -4.439996 | -1.266547 | 0.692177  |
| C | -4.848782 | -0.994695 | -0.771983 |
| C | -3.736051 | -0.058838 | -1.262509 |
| C | -2.172079 | -0.277123 | 1.452710  |
| N | -1.428412 | 0.626727  | 0.758259  |
| O | -1.740832 | -1.127324 | 2.228231  |
| H | -5.804930 | -0.463015 | -0.799212 |
| H | -3.803101 | -2.157712 | 0.743273  |
| H | -5.300240 | -1.439472 | 1.343128  |
| H | -4.103210 | 0.523414  | 1.924638  |
| H | -4.009469 | 0.487298  | -2.169112 |
| H | -2.835484 | -0.661853 | -1.476546 |
| C | -1.669276 | 1.919208  | -1.380338 |
| H | -2.387359 | 2.500626  | -1.966469 |
| H | -0.775366 | 2.537190  | -1.249474 |
| H | -1.390315 | 1.024533  | -1.939443 |
| C | -2.489880 | 2.867119  | 0.798590  |
| H | -1.531252 | 3.351048  | 1.015540  |
| H | -3.109902 | 3.569850  | 0.233571  |
| H | -2.987453 | 2.653747  | 1.749479  |
| O | -5.045411 | -2.150540 | -1.569755 |
| H | -4.219460 | -2.662588 | -1.557669 |
| C | 0.000023  | 0.701325  | 0.916148  |
| C | 0.761421  | -0.157682 | -0.096195 |
| O | 0.257511  | -0.895147 | -0.917840 |
| O | 2.081854  | 0.010068  | 0.070211  |
| C | 4.373532  | -0.478485 | -0.439742 |
| C | 5.013324  | -1.211648 | 0.568584  |
| C | 6.331360  | -0.924118 | 0.926102  |
| C | 7.023985  | 0.100866  | 0.275899  |
| C | 6.394565  | 0.835813  | -0.731941 |
| C | 5.075775  | 0.546509  | -1.086737 |
| C | 2.946988  | -0.776305 | -0.808138 |
| H | 0.351096  | 1.734791  | 0.842211  |
| H | 0.261945  | 0.339937  | 1.916923  |
| H | 4.476710  | -2.012082 | 1.072373  |
| H | 6.818437  | -1.501244 | 1.707216  |
| H | 8.051516  | 0.322888  | 0.550715  |
| H | 6.930551  | 1.630626  | -1.243248 |
| H | 4.588059  | 1.117258  | -1.873367 |
| H | 2.723840  | -0.498971 | -1.841528 |
| H | 2.699306  | -1.831887 | -0.670851 |

Aldol Reaction Cycle with *trans*-4-Hyp-Gly-OBn (*trans*-**6**) as a Catalyst

Table S4. Numbers of conformers of intermediates and transition structures from *trans*-**6**.

|                                                   | # conformers | # conformers accounting for $\geq 95\%$ |
|---------------------------------------------------|--------------|-----------------------------------------|
| <i>trans</i> - <b>6</b>                           | 84           | 27                                      |
| TS1 from <i>trans</i> - <b>6</b>                  | 5            | 5                                       |
| Hemiaminal from <i>trans</i> - <b>6</b>           | 93           | 16                                      |
| TS2 from <i>trans</i> - <b>6</b>                  | 20           | 14                                      |
| Iminium from <i>trans</i> - <b>6</b>              | 42           | 25                                      |
| TS3 from <i>trans</i> - <b>6</b>                  | 6            | 5                                       |
| Enamine from <i>trans</i> - <b>6</b>              | 99           | 54                                      |
| TS4 <sub>pro R</sub> from <i>trans</i> - <b>6</b> | 9            | 5                                       |
| TS4 <sub>pro S</sub> from <i>trans</i> - <b>6</b> | 15           | 3                                       |
| TS3a from <i>trans</i> - <b>6</b>                 | 5            | 3                                       |
| Bicyclic by-product from <i>trans</i> - <b>6</b>  | 23           | 12                                      |

*trans*-**6** (most abundant conformer; abundance: 24%)

# of imaginary frequencies: 0

Energy: -954.752156 Hartrees

Gibbs Free Energy: -954.501349 Hartrees

|   |          |           |           |
|---|----------|-----------|-----------|
| H | 7.887475 | 1.021453  | 0.699830  |
| H | 7.008075 | 0.982579  | -1.626113 |
| H | 4.782957 | -0.005898 | -2.094578 |
| H | 2.959397 | -1.493076 | -1.341120 |
| H | 2.781704 | -1.912188 | 0.373993  |

|   |           |           |           |
|---|-----------|-----------|-----------|
| C | -5.570720 | -0.396818 | 0.925524  |
| C | -4.430442 | -1.363141 | 0.567069  |
| N | -3.862043 | -0.842758 | -0.691984 |
| C | -3.926429 | 0.633585  | -0.565991 |
| C | -4.976951 | 0.964439  | 0.542323  |
| C | -2.554327 | 1.245423  | -0.243102 |
| O | -6.712187 | -0.614785 | 0.086348  |
| N | -1.511089 | 0.408712  | -0.413543 |
| O | -2.436137 | 2.421496  | 0.116037  |
| C | -0.145667 | 0.806330  | -0.177139 |
| C | 0.773582  | -0.384988 | -0.377487 |
| O | 0.398190  | -1.498309 | -0.691998 |
| O | 2.048225  | -0.041640 | -0.161888 |
| C | 4.393928  | -0.526771 | -0.038959 |
| C | 4.897509  | -0.502326 | 1.268356  |
| C | 6.149352  | 0.054085  | 1.535008  |
| C | 6.911081  | 0.591476  | 0.493937  |
| C | 6.417375  | 0.569940  | -0.812977 |
| C | 5.164730  | 0.013293  | -1.076620 |
| C | 3.037201  | -1.108540 | -0.321203 |
| H | -5.855547 | -0.449320 | 1.985079  |
| H | -3.660725 | -1.339340 | 1.349647  |
| H | -4.757632 | -2.400197 | 0.444132  |
| H | -4.487725 | -1.119421 | -1.445947 |
| H | -4.223635 | 1.064044  | -1.528142 |
| H | -4.495390 | 1.436176  | 1.403194  |
| H | -5.760413 | 1.638684  | 0.188016  |
| H | -7.068030 | -1.492557 | 0.301265  |
| H | -1.716973 | -0.548432 | -0.686835 |
| H | 0.165083  | 1.611318  | -0.855936 |
| H | -0.011364 | 1.193330  | 0.841067  |
| H | 4.307279  | -0.923515 | 2.078669  |
| H | 6.531338  | 0.064673  | 2.552048  |

TS1 from *trans*-**6** (most abundant conformer; abundance: 51%)

# of imaginary frequencies: 1

Energy: -1147.854678 Hartrees

Gibbs Free Energy: -1147.523902 Hartrees

|   |           |           |           |
|---|-----------|-----------|-----------|
| C | -1.933973 | -0.051656 | 1.111409  |
| C | -1.443491 | -1.256844 | 1.940322  |
| C | -1.072301 | -2.320845 | 0.898084  |
| C | -2.108868 | -2.072108 | -0.204010 |
| N | -2.176749 | -0.591472 | -0.285016 |
| C | -0.960953 | 1.150503  | 1.185866  |
| H | -0.618185 | -0.975719 | 2.595068  |
| H | -2.259951 | -1.638651 | 2.564480  |
| H | -3.081047 | -2.484677 | 0.094561  |
| H | -1.822971 | -2.492571 | -1.168907 |
| H | -0.070328 | -2.127932 | 0.501420  |
| H | -2.884025 | 0.310066  | 1.514634  |
| H | -1.454652 | 1.786687  | -0.725513 |
| C | -3.246257 | 0.114168  | -1.223475 |
| H | -1.563848 | -0.019427 | -1.214582 |
| C | -4.212817 | 1.030417  | -0.475163 |
| H | -4.870935 | 0.474315  | 0.201792  |
| H | -3.690913 | 1.808910  | 0.086448  |
| H | -4.841845 | 1.529983  | -1.219116 |
| C | -4.008067 | -0.920518 | -2.054904 |
| H | -4.629906 | -0.374556 | -2.771533 |
| H | -3.321449 | -1.550592 | -2.625906 |
| H | -4.665289 | -1.553247 | -1.448737 |
| O | -0.289548 | 1.332085  | 2.205973  |
| O | -2.277654 | 0.786395  | -1.977852 |
| O | -1.033630 | -3.653380 | 1.372220  |
| H | -1.886577 | -3.848079 | 1.796077  |

|   |           |           |           |
|---|-----------|-----------|-----------|
| N | -0.952056 | 2.015903  | 0.148047  |
| C | -0.115859 | 3.194098  | 0.202790  |
| C | 1.392992  | 2.951039  | 0.183659  |
| O | 2.188745  | 3.778913  | 0.581921  |
| O | 1.726279  | 1.768820  | -0.352808 |
| C | 3.293124  | -0.052559 | -0.431821 |
| C | 3.973042  | -0.671164 | -1.485842 |
| C | 4.139765  | -2.059063 | -1.506306 |
| C | 3.617797  | -2.840443 | -0.474837 |
| C | 2.930989  | -2.229582 | 0.580274  |
| C | 2.773152  | -0.843942 | 0.603470  |
| C | 3.145139  | 1.444979  | -0.387622 |
| H | -0.357152 | 3.824829  | -0.658722 |
| H | -0.319051 | 3.775697  | 1.106378  |
| H | 4.375982  | -0.065828 | -2.294197 |
| H | 4.671914  | -2.526581 | -2.330162 |
| H | 3.743510  | -3.919549 | -0.490124 |
| H | 2.522939  | -2.833541 | 1.386271  |
| H | 2.235719  | -0.369553 | 1.420727  |
| H | 3.611826  | 1.877479  | 0.501282  |
| H | 3.583853  | 1.919961  | -1.269854 |

Hemiaminal from *trans*-**6** (most abundant conformer; abundance: 25%)  
# of imaginary frequencies: 0  
Energy: -1147.913697 Hartrees  
Gibbs Free Energy: -1147.581225 Hartrees

|   |           |           |           |
|---|-----------|-----------|-----------|
| C | -3.057181 | -0.937309 | 0.417765  |
| C | -3.879695 | -2.063494 | -0.258863 |
| C | -4.990219 | -1.292891 | -0.983866 |
| C | -4.215325 | -0.080979 | -1.511454 |
| N | -3.236001 | 0.264255  | -0.440310 |
| C | -1.596725 | -1.364892 | 0.589003  |
| H | -3.266548 | -2.604980 | -0.989325 |
| H | -4.268195 | -2.781310 | 0.466743  |
| H | -3.681070 | -0.340071 | -2.433823 |
| H | -4.886465 | 0.749326  | -1.730603 |
| H | -5.439070 | -1.880580 | -1.791084 |
| H | -3.457177 | -0.769946 | 1.422267  |
| C | -3.464033 | 1.519738  | 0.264683  |
| C | -3.435275 | 2.710673  | -0.704344 |
| H | -4.211923 | 2.640672  | -1.468980 |
| H | -3.594873 | 3.641510  | -0.149587 |
| H | -2.461018 | 2.772199  | -1.198809 |
| C | -2.423856 | 1.743961  | 1.371910  |
| H | -2.610117 | 2.711892  | 1.849140  |
| H | -2.486615 | 0.977347  | 2.148211  |
| H | -1.409313 | 1.750961  | 0.963831  |
| O | -1.269367 | -2.171100 | 1.462892  |
| O | -4.788869 | 1.421296  | 0.875188  |
| O | -6.050712 | -0.917809 | -0.110412 |
| H | -5.765119 | -0.110475 | 0.365687  |
| H | -5.014413 | 2.264597  | 1.301128  |
| N | -0.743754 | -0.845433 | -0.328574 |
| H | -1.129698 | -0.113690 | -0.916779 |
| C | 0.671901  | -1.101300 | -0.316181 |
| C | 1.492129  | 0.153502  | -0.035024 |
| O | 1.036897  | 1.256164  | 0.195577  |
| O | 2.801652  | -0.130273 | -0.092327 |

|   |          |           |           |
|---|----------|-----------|-----------|
| C | 5.120230 | 0.471660  | 0.018951  |
| C | 5.794850 | -0.052608 | 1.129344  |
| C | 7.093762 | -0.547174 | 1.000946  |
| C | 7.731445 | -0.521428 | -0.242144 |
| C | 7.066717 | 0.000847  | -1.354758 |
| C | 5.767837 | 0.494623  | -1.223253 |
| C | 3.714017 | 0.985400  | 0.154276  |
| H | 0.872554 | -1.842340 | 0.463324  |
| H | 5.300963 | -0.070023 | 2.097938  |
| H | 7.608492 | -0.948124 | 1.869704  |
| H | 8.743954 | -0.902738 | -0.342461 |
| H | 7.560306 | 0.027164  | -2.322298 |
| H | 5.252854 | 0.903902  | -2.089089 |
| H | 3.513648 | 1.372483  | 1.156667  |
| H | 3.492859 | 1.771792  | -0.571768 |
| H | 1.013985 | -1.527510 | -1.267127 |

TS2 from *trans*-**6** (most abundant conformer; abundance: 22%)  
# of imaginary frequencies: 1  
Energy: -1147.871667 Hartrees  
Gibbs Free Energy: -1147.544792 Hartrees

|   |           |           |           |
|---|-----------|-----------|-----------|
| C | 3.081120  | 2.106608  | -0.516685 |
| C | 3.943298  | 0.908759  | -0.939293 |
| N | 3.770035  | -0.076501 | 0.149622  |
| C | 2.884229  | 0.460675  | 1.216727  |
| C | 3.023452  | 1.975613  | 1.011935  |
| C | 4.224083  | -1.319297 | 0.081605  |
| C | 1.394165  | 0.034622  | 1.127940  |
| O | 0.612570  | 0.603511  | 1.920834  |
| O | 2.754644  | -2.248653 | -1.045104 |
| H | 3.263873  | 0.155085  | 2.194689  |
| H | 3.966241  | 2.339310  | 1.435998  |
| H | 2.190504  | 2.510670  | 1.470201  |
| H | 2.070475  | 1.998479  | -0.932698 |
| H | 4.990925  | 1.221901  | -1.005888 |
| H | 3.636540  | 0.480356  | -1.896509 |
| H | 1.950339  | -1.634429 | -0.502988 |
| H | 2.653526  | -3.160035 | -0.723023 |
| C | 5.332546  | -1.630956 | -0.887657 |
| H | 6.270535  | -1.222135 | -0.488003 |
| H | 5.444843  | -2.710132 | -0.994733 |
| H | 5.158121  | -1.198333 | -1.872691 |
| C | 4.123439  | -2.189330 | 1.308627  |
| H | 4.850922  | -1.840719 | 2.053086  |
| H | 3.128638  | -2.160228 | 1.754613  |
| H | 4.369366  | -3.222418 | 1.057788  |
| O | 3.696785  | 3.292141  | -0.998311 |
| H | 3.074948  | 4.023179  | -0.855185 |
| N | 1.075125  | -0.882049 | 0.216894  |
| C | -0.331667 | -1.199132 | 0.143493  |
| C | -1.175016 | -0.074045 | -0.457337 |
| O | -0.763675 | 0.858290  | -1.118782 |
| O | -2.482699 | -0.275722 | -0.190232 |
| C | -4.802397 | 0.298553  | -0.359646 |
| C | -5.554558 | -0.574102 | -1.156988 |
| C | -6.840964 | -0.956278 | -0.772662 |
| C | -7.389231 | -0.467553 | 0.416102  |
| C | -6.647161 | 0.404221  | 1.217300  |



|   |           |           |           |
|---|-----------|-----------|-----------|
| C | -5.361106 | 0.784301  | 0.829868  |
| C | -3.408181 | 0.692457  | -0.764122 |
| H | -0.467339 | -2.076773 | -0.502705 |
| H | -0.766435 | -1.446073 | 1.120393  |
| H | -5.130633 | -0.952657 | -2.084140 |
| H | -7.415688 | -1.630854 | -1.401358 |
| H | -8.391897 | -0.761321 | 0.714589  |
| H | -7.070687 | 0.790586  | 2.140325  |
| H | -4.786011 | 1.465435  | 1.452644  |
| H | -3.282788 | 0.688262  | -1.850419 |
| H | -3.141750 | 1.685463  | -0.392088 |

Iminium from *trans*-**6** (most abundant conformer;  
abundance: 13%)

# of imaginary frequencies: 0

Energy: -1071.443229 Hartrees

Gibbs Free Energy: -1071.138514 Hartrees

|   |           |           |           |
|---|-----------|-----------|-----------|
| C | -3.280147 | -0.823762 | 0.491048  |
| C | -4.080239 | -1.869238 | -0.318503 |
| C | -5.226265 | -1.084538 | -0.968749 |
| C | -4.576505 | 0.257925  | -1.280688 |
| N | -3.695634 | 0.481442  | -0.108310 |
| C | -1.750661 | -1.094278 | 0.405551  |
| O | -1.343984 | -1.987029 | 1.198030  |
| H | -3.444021 | -2.297774 | -1.100031 |
| H | -4.441358 | -2.686527 | 0.310495  |
| H | -5.308684 | 1.057911  | -1.379188 |
| H | -3.954093 | 0.199937  | -2.178988 |
| H | -5.599406 | -1.564188 | -1.881791 |
| H | -3.583139 | -0.821954 | 1.540156  |
| C | -3.308856 | 1.641418  | 0.317494  |
| C | -2.468807 | 1.773624  | 1.543842  |
| H | -1.414801 | 1.647814  | 1.255876  |
| H | -2.603512 | 2.765476  | 1.981710  |
| H | -2.697118 | 1.011054  | 2.292004  |
| C | -3.686569 | 2.895481  | -0.410563 |
| H | -3.818320 | 2.746399  | -1.482939 |
| H | -4.625102 | 3.287212  | 0.005003  |
| H | -2.918645 | 3.655427  | -0.246995 |
| O | -6.288313 | -0.814203 | -0.056348 |
| H | -6.679491 | -1.664831 | 0.200623  |
| N | -1.129928 | -0.408267 | -0.531573 |
| C | 0.274418  | -0.718594 | -0.645582 |
| C | 1.179460  | 0.211103  | 0.158028  |
| O | 0.829482  | 1.066327  | 0.950692  |
| O | 2.480326  | -0.039029 | -0.118032 |
| C | 4.828903  | 0.319920  | 0.178416  |
| C | 5.488496  | -0.698383 | 0.879156  |
| C | 6.753607  | -1.131795 | 0.478679  |
| C | 7.373346  | -0.549069 | -0.629850 |
| C | 6.723867  | 0.467862  | -1.334626 |
| C | 5.458953  | 0.898816  | -0.931109 |
| C | 3.455918  | 0.769740  | 0.598168  |
| H | 0.526167  | -1.739565 | -0.312476 |
| H | 0.605987  | -0.638922 | -1.691321 |
| H | 5.008947  | -1.150918 | 1.743955  |
| H | 7.256125  | -1.919998 | 1.032642  |
| H | 8.359563  | -0.883054 | -0.940629 |
| H | 7.203278  | 0.927173  | -2.194782 |

|   |          |          |           |
|---|----------|----------|-----------|
| H | 4.956291 | 1.692578 | -1.478740 |
| H | 3.295912 | 0.637242 | 1.671771  |
| H | 3.280745 | 1.821373 | 0.353807  |

TS3 from *trans*-**6** (most abundant conformer;  
abundance: 42%)

# of imaginary frequencies: 1

Energy: -1071.426912 Hartrees

Gibbs Free Energy: -1071.124039 Hartrees

|   |           |           |           |
|---|-----------|-----------|-----------|
| C | -3.274420 | 0.269066  | -1.126201 |
| C | -3.893491 | 1.652164  | -0.946046 |
| C | -3.752025 | 1.921358  | 0.560360  |
| C | -4.008342 | 0.549677  | 1.198963  |
| N | -3.619889 | -0.421805 | 0.158016  |
| C | -1.721299 | 0.303629  | -1.289083 |
| O | -1.113223 | 1.389430  | -1.228365 |
| H | -3.382036 | 2.398594  | -1.555819 |
| H | -4.957916 | 1.632316  | -1.204705 |
| H | -5.075863 | 0.448557  | 1.428402  |
| H | -3.435540 | 0.393406  | 2.115658  |
| H | -2.725223 | 2.242560  | 0.771837  |
| H | -3.722369 | -0.282357 | -1.956945 |
| C | -3.535822 | -1.733293 | 0.338713  |
| C | -3.123853 | -2.581394 | -0.736737 |
| H | -2.000457 | -1.980263 | -1.080128 |
| H | -3.089743 | -3.639349 | -0.486238 |
| C | -3.729060 | -2.266498 | 1.731533  |
| H | -3.662505 | -3.354663 | 1.734439  |
| H | -2.971414 | -1.865262 | 2.415787  |
| H | -4.709671 | -1.976369 | 2.126095  |
| H | -3.624563 | -2.400998 | -1.692733 |
| O | -4.690185 | 2.841680  | 1.097843  |
| H | -4.419068 | 3.731023  | 0.820348  |
| N | -1.175093 | -0.907495 | -1.477740 |
| C | 0.268458  | -0.947809 | -1.496074 |
| C | 0.911782  | -0.680301 | -0.134892 |
| O | 0.352717  | -0.738202 | 0.942009  |
| O | 2.225475  | -0.407583 | -0.279983 |
| C | 4.407028  | 0.077628  | 0.582045  |
| C | 5.328437  | -0.971721 | 0.469062  |
| C | 6.652006  | -0.718263 | 0.104788  |
| C | 7.067902  | 0.590988  | -0.150652 |
| C | 6.156383  | 1.644352  | -0.039405 |
| C | 4.833838  | 1.387311  | 0.325411  |
| C | 2.975644  | -0.199366 | 0.952105  |
| H | 0.594462  | -1.948713 | -1.809198 |
| H | 0.697648  | -0.235028 | -2.211120 |
| H | 5.007231  | -1.990962 | 0.670368  |
| H | 7.357948  | -1.540288 | 0.023900  |
| H | 8.098669  | 0.790076  | -0.431019 |
| H | 6.475957  | 2.664719  | -0.232648 |
| H | 4.126518  | 2.208448  | 0.414745  |
| H | 2.880617  | -1.096353 | 1.570297  |
| H | 2.524915  | 0.638231  | 1.491372  |

Enamine from *trans*-**6** (most abundant conformer;  
abundance: 6%)

# of imaginary frequencies: 0

Energy: -1071.465517 Hartrees

Gibbs Free Energy: -1071.159728 Hartrees

|   |           |           |           |
|---|-----------|-----------|-----------|
| C | -4.114937 | -1.636670 | -0.841791 |
| C | -4.326717 | -0.160837 | -1.211072 |
| N | -3.601656 | 0.553249  | -0.153577 |
| C | -3.504291 | -0.261250 | 1.065457  |
| C | -4.173973 | -1.605260 | 0.693059  |
| C | -2.061458 | -0.475037 | 1.557575  |
| N | -1.089630 | -0.230617 | 0.654369  |
| O | -1.840600 | -0.892566 | 2.697460  |
| C | -3.601331 | 1.950857  | -0.063721 |
| C | -3.902299 | 2.684060  | -1.349692 |
| C | -3.303161 | 2.624282  | 1.067144  |
| H | -3.934992 | 0.080892  | -2.202401 |
| H | -5.406935 | 0.064281  | -1.205745 |
| H | -3.122177 | -1.957523 | -1.173919 |
| H | -3.693782 | -2.464227 | 1.167796  |
| H | -5.224756 | -1.590163 | 1.007918  |
| H | -4.036951 | 0.209433  | 1.901126  |
| H | -3.832500 | 3.762657  | -1.193074 |
| H | -3.195276 | 2.406239  | -2.141234 |
| H | -4.908896 | 2.459348  | -1.722466 |
| H | -3.275419 | 3.707826  | 1.054093  |
| H | -3.057497 | 2.141968  | 2.006307  |
| H | -1.337342 | 0.182691  | -0.238020 |
| O | -5.020445 | -2.530887 | -1.463266 |
| H | -5.916497 | -2.301332 | -1.164557 |
| C | 0.311983  | -0.375251 | 0.968341  |
| H | 0.568761  | -1.418355 | 1.190622  |
| H | 0.585529  | 0.208488  | 1.856715  |
| C | 1.142542  | 0.099593  | -0.210620 |
| O | 0.675607  | 0.557524  | -1.236490 |
| O | 2.447108  | -0.052557 | 0.034896  |
| C | 3.357343  | 0.379108  | -1.027729 |
| H | 3.170481  | 1.438226  | -1.221812 |
| H | 3.116802  | -0.188316 | -1.930066 |
| C | 4.763593  | 0.128866  | -0.560562 |
| C | 7.375463  | -0.351448 | 0.343402  |
| C | 5.398889  | -1.087960 | -0.840385 |
| C | 5.450468  | 1.103454  | 0.175372  |
| C | 6.749679  | 0.865652  | 0.626169  |
| C | 6.698512  | -1.328291 | -0.391286 |
| H | 4.874167  | -1.847581 | -1.414810 |
| H | 4.965781  | 2.052204  | 0.392714  |
| H | 7.274067  | 1.629779  | 1.193184  |
| H | 7.182862  | -2.274193 | -0.617230 |
| H | 8.388374  | -0.536081 | 0.690560  |

TS4<sub>pro R</sub> from *trans*-**6** (most abundant conformer;  
abundance: 76%)

# of imaginary frequencies: 1

Energy: -1621.540562 Hartrees

Gibbs Free Energy: -1621.134199 Hartrees

|   |           |           |           |
|---|-----------|-----------|-----------|
| C | 0.766600  | -4.606713 | 1.000644  |
| C | 1.542711  | -3.592904 | 0.151160  |
| N | 0.530895  | -3.051628 | -0.791974 |
| C | -0.752122 | -3.781424 | -0.682747 |
| C | -0.365317 | -5.065887 | 0.067719  |
| C | -1.869106 | -3.003206 | 0.050736  |

|   |           |           |           |
|---|-----------|-----------|-----------|
| N | -1.531802 | -1.862514 | 0.684566  |
| O | -3.006892 | -3.480604 | 0.039094  |
| C | 0.775253  | -2.090649 | -1.674194 |
| C | -0.296046 | -1.713309 | -2.659178 |
| C | 1.941009  | -1.280463 | -1.555619 |
| H | 1.976124  | -2.788222 | 0.738686  |
| H | 2.323858  | -4.113389 | -0.416043 |
| H | 0.343298  | -4.102459 | 1.879758  |
| H | -1.219794 | -5.503075 | 0.588579  |
| H | 0.035771  | -5.804093 | -0.634915 |
| H | -1.146659 | -4.004751 | -1.675545 |
| H | 0.069840  | -0.931674 | -3.326229 |
| H | -0.591875 | -2.574082 | -3.269318 |
| H | -1.192259 | -1.340155 | -2.147480 |
| H | 2.190249  | -0.715203 | -2.450011 |
| H | 2.810688  | -1.727760 | -1.082533 |
| H | -0.573776 | -1.450149 | 0.646997  |
| O | 0.927194  | -0.614881 | 0.788140  |
| C | 1.379120  | -0.027765 | -0.271115 |
| C | 2.657293  | 0.784188  | -0.128436 |
| C | 3.469069  | 0.602768  | 0.999741  |
| C | 4.633124  | 1.343900  | 1.165736  |
| C | 4.976103  | 2.281463  | 0.188410  |
| C | 4.180970  | 2.492961  | -0.941142 |
| C | 3.022530  | 1.739497  | -1.089229 |
| N | 6.194256  | 3.068223  | 0.355284  |
| O | 6.885793  | 2.871772  | 1.359607  |
| O | 6.481563  | 3.895411  | -0.515889 |
| H | 0.655733  | 0.525131  | -0.905082 |
| H | 3.159905  | -0.118984 | 1.747742  |
| H | 5.268303  | 1.212641  | 2.033019  |
| H | 4.470982  | 3.234482  | -1.674912 |
| H | 2.390197  | 1.898979  | -1.959036 |
| O | 1.661195  | -5.632291 | 1.397813  |
| H | 1.212807  | -6.171682 | 2.068448  |
| C | -2.562729 | -1.062657 | 1.298242  |
| H | -2.099022 | -0.365048 | 2.002280  |
| H | -3.261000 | -1.689835 | 1.859579  |
| C | -3.362701 | -0.248268 | 0.280089  |
| O | -3.112799 | -0.165984 | -0.905953 |
| O | -4.381357 | 0.372167  | 0.895705  |
| C | -5.243278 | 1.229473  | 0.081077  |
| H | -6.217295 | 1.153177  | 0.566829  |
| H | -5.298787 | 0.806236  | -0.922641 |
| C | -4.747837 | 2.653083  | 0.063008  |
| C | -3.813307 | 5.299841  | 0.056884  |
| C | -5.110902 | 3.538074  | 1.087404  |
| C | -3.912137 | 3.108742  | -0.966107 |
| C | -3.448066 | 4.425353  | -0.969882 |
| C | -4.646057 | 4.854033  | 1.086718  |
| H | -5.764345 | 3.194678  | 1.886004  |
| H | -3.624301 | 2.425644  | -1.759962 |
| H | -2.803950 | 4.768944  | -1.774735 |
| H | -4.936982 | 5.531334  | 1.884982  |
| H | -3.453788 | 6.325251  | 0.052755  |

TS4<sub>pro S</sub> from *trans*-**6** (most abundant conformer;  
abundance: 49%)

# of imaginary frequencies: 1

Energy: -1621.536567 Hartrees

Gibbs Free Energy: -1621.127698 Hartrees

|   |           |           |           |
|---|-----------|-----------|-----------|
| C | -2.839922 | 2.194773  | 0.071593  |
| C | -1.639711 | 2.133801  | -0.881959 |
| N | -0.454027 | 2.341830  | -0.008150 |
| C | -0.867484 | 2.595086  | 1.390467  |
| C | -2.326748 | 3.052055  | 1.239744  |
| C | -0.779140 | 1.361739  | 2.321522  |
| N | -0.368712 | 0.195191  | 1.783533  |
| O | -1.104626 | 1.518496  | 3.501176  |
| C | 0.787346  | 2.416241  | -0.459954 |
| C | 1.893153  | 2.783266  | 0.487910  |
| C | 1.087670  | 1.963441  | -1.783920 |
| H | -1.552063 | 1.184981  | -1.405471 |
| H | -1.704363 | 2.960048  | -1.599063 |
| H | -3.081266 | 1.183789  | 0.425112  |
| H | -2.886121 | 2.920709  | 2.167623  |
| H | -2.360858 | 4.107018  | 0.947795  |
| H | -0.243838 | 3.370786  | 1.837330  |
| H | 2.855079  | 2.746725  | -0.023184 |
| H | 1.748616  | 3.797869  | 0.877591  |
| H | 1.929464  | 2.100510  | 1.344402  |
| H | 2.037393  | 2.324431  | -2.170403 |
| H | 0.284843  | 2.072325  | -2.508503 |
| H | -0.130674 | 0.103771  | 0.775012  |
| O | 0.246560  | -0.352201 | -0.889573 |
| C | 1.196234  | 0.132896  | -1.631428 |
| C | 2.641401  | -0.147054 | -1.219758 |
| C | 2.911331  | -0.763944 | 0.008413  |
| C | 4.215086  | -1.062831 | 0.391457  |
| C | 5.257647  | -0.747602 | -0.480820 |
| C | 5.021933  | -0.152014 | -1.723619 |
| C | 3.712455  | 0.139237  | -2.083368 |
| N | 6.629778  | -1.057244 | -0.090757 |
| O | 6.821326  | -1.586592 | 1.008510  |
| O | 7.539752  | -0.774709 | -0.876637 |
| H | 1.108281  | -0.047114 | -2.722938 |
| H | 2.078728  | -1.022817 | 0.651639  |
| H | 4.430489  | -1.537131 | 1.340933  |
| H | 5.851764  | 0.067159  | -2.383763 |
| H | 3.518545  | 0.591362  | -3.052891 |
| O | -3.937041 | 2.750051  | -0.635010 |
| H | -4.734037 | 2.609964  | -0.099602 |
| C | -0.349607 | -1.012413 | 2.578624  |
| H | -0.631653 | -0.747435 | 3.602664  |
| C | -1.286782 | -2.117398 | 2.103180  |
| O | -1.153547 | -3.275562 | 2.447319  |
| O | -2.261903 | -1.669562 | 1.299926  |
| C | -3.161176 | -2.672288 | 0.751163  |
| H | -3.878648 | -2.957968 | 1.525861  |
| H | -2.565834 | -3.555039 | 0.500155  |
| C | -3.849361 | -2.094048 | -0.457322 |
| C | -5.139937 | -1.108028 | -2.746135 |
| C | -5.241689 | -2.167167 | -0.573968 |
| C | -3.102528 | -1.517624 | -1.497022 |
| C | -3.748396 | -1.023581 | -2.631090 |
| C | -5.885653 | -1.681802 | -1.715590 |
| H | -5.826478 | -2.606922 | 0.230508  |
| H | -2.021387 | -1.435171 | -1.408531 |
| H | -3.164199 | -0.575653 | -3.430740 |

|   |           |           |           |
|---|-----------|-----------|-----------|
| H | -6.967467 | -1.746784 | -1.793863 |
| H | -5.638033 | -0.725887 | -3.633071 |
| H | 0.653548  | -1.449785 | 2.618601  |

TS3a from *trans*-**6** (most abundant conformer;  
abundance: 47%)

# of imaginary frequencies: 1

Energy: -1071.437036 Hartrees

Gibbs Free Energy: -1071.130564 Hartrees

|   |           |           |           |
|---|-----------|-----------|-----------|
| C | -3.034099 | 1.900648  | -0.129081 |
| N | -3.717099 | 0.772747  | -0.126316 |
| C | -3.617076 | -0.102071 | 1.065928  |
| C | -4.283338 | -1.404620 | 0.625400  |
| C | -3.920888 | -1.494069 | -0.864782 |
| C | -3.981884 | -0.034359 | -1.337165 |
| C | -2.094147 | -0.275646 | 1.394716  |
| O | -1.814546 | -1.135939 | 2.267663  |
| H | -2.893604 | -1.866370 | -0.974203 |
| H | -3.914706 | -2.244635 | 1.217291  |
| H | -5.373057 | -1.345136 | 0.724653  |
| H | -4.116669 | 0.340031  | 1.930863  |
| H | -4.989917 | 0.190485  | -1.703563 |
| H | -3.264225 | 0.182078  | -2.128443 |
| C | -2.645930 | 2.540575  | -1.431738 |
| H | -3.535625 | 2.742395  | -2.039835 |
| H | -2.131542 | 3.485793  | -1.252270 |
| H | -1.985563 | 1.884552  | -2.005025 |
| C | -2.994711 | 2.789577  | 1.080257  |
| H | -2.014631 | 3.262948  | 1.161290  |
| H | -3.736277 | 3.586795  | 0.921356  |
| H | -3.225644 | 2.281490  | 2.014278  |
| O | -4.816260 | -2.256248 | -1.659734 |
| H | -4.664286 | -3.192763 | -1.456164 |
| N | -1.311755 | 0.532432  | 0.705387  |
| C | 0.090117  | 0.484424  | 1.018036  |
| C | 0.892362  | -0.349946 | 0.022687  |
| O | 0.443366  | -1.166041 | -0.757656 |
| O | 2.212224  | -0.082266 | 0.140689  |
| C | 4.512926  | -0.423891 | -0.428661 |
| C | 5.083578  | 0.645149  | -1.132097 |
| C | 6.385875  | 1.063587  | -0.853970 |
| C | 7.132716  | 0.414456  | 0.132767  |
| C | 6.572766  | -0.653602 | 0.838504  |
| C | 5.269876  | -1.069040 | 0.558079  |
| C | 3.100894  | -0.857871 | -0.713351 |
| H | 0.529112  | 1.490481  | 1.032260  |
| H | 0.275282  | 0.035428  | 2.009287  |
| H | 4.504963  | 1.149185  | -1.902685 |
| H | 6.818382  | 1.891818  | -1.408604 |
| H | 8.147928  | 0.736767  | 0.347707  |
| H | 7.150777  | -1.164489 | 1.603693  |
| H | 4.836618  | -1.902178 | 1.106460  |
| H | 2.822273  | -0.677564 | -1.755303 |
| H | 2.949913  | -1.919216 | -0.497409 |

Bicyclic by-product from *trans*-**6** (most abundant  
conformer; abundance: 32%)

# of imaginary frequencies: 0

Energy: -1071.482906 Hartrees

Gibbs Free Energy: -1071.171538 Hartrees

|   |           |           |           |
|---|-----------|-----------|-----------|
| C | -2.247196 | 1.294685  | 0.554474  |
| N | -3.508337 | 0.674426  | 0.095526  |
| C | -3.606483 | -0.623967 | 0.818732  |
| C | -4.393949 | -1.578736 | -0.104392 |
| C | -4.739948 | -0.699240 | -1.326214 |
| C | -3.582409 | 0.298800  | -1.338837 |
| C | -2.147854 | -1.018580 | 1.075626  |
| N | -1.401098 | 0.102133  | 0.872769  |
| O | -1.723768 | -2.120739 | 1.414591  |
| H | -4.813174 | -1.274659 | -2.252068 |
| H | -3.771358 | -2.431926 | -0.392276 |
| H | -5.301335 | -1.965771 | 0.364764  |
| H | -4.098030 | -0.493012 | 1.789742  |
| H | -3.792686 | 1.171314  | -1.961973 |
| H | -2.664358 | -0.189839 | -1.702590 |
| C | -1.601909 | 2.196438  | -0.498980 |
| H | -2.315959 | 2.968621  | -0.800914 |
| H | -0.727668 | 2.703470  | -0.078438 |
| H | -1.285026 | 1.637014  | -1.380613 |
| C | -2.515546 | 2.096843  | 1.840046  |
| H | -1.576275 | 2.451005  | 2.278448  |
| H | -3.138368 | 2.967174  | 1.611749  |
| H | -3.032283 | 1.487375  | 2.587382  |
| O | -5.992358 | -0.030711 | -1.174147 |
| H | -5.858682 | 0.622668  | -0.464752 |
| C | 0.022561  | 0.105488  | 1.082231  |
| C | 0.817468  | -0.205308 | -0.188359 |
| O | 0.342190  | -0.528728 | -1.257355 |
| O | 2.130456  | -0.086946 | 0.058023  |
| C | 4.438957  | -0.207544 | -0.579985 |
| C | 5.134725  | -1.277940 | -0.002704 |
| C | 6.440240  | -1.107110 | 0.460552  |
| C | 7.063464  | 0.138680  | 0.349932  |
| C | 6.377663  | 1.211409  | -0.225787 |
| C | 5.072181  | 1.037533  | -0.688121 |
| C | 3.025600  | -0.387631 | -1.058882 |
| H | 0.359447  | 1.063146  | 1.489635  |
| H | 0.268202  | -0.666474 | 1.820212  |
| H | 4.652053  | -2.248748 | 0.080725  |
| H | 6.971360  | -1.945205 | 0.903208  |
| H | 8.081044  | 0.271784  | 0.706926  |
| H | 6.859875  | 2.180630  | -0.318115 |
| H | 4.540777  | 1.872114  | -1.139189 |
| H | 2.781134  | 0.290041  | -1.880826 |
| H | 2.829798  | -1.412558 | -1.383990 |

Partial Aldol Reaction Cycle with *cis*-4-Hyp-NHMe (*cis*-**12**) as a Catalyst

Table S5. Numbers of conformers of intermediates and transition structures from *cis*-**12**.

|                                                                                  | # conformers | # conformers accounting for $\geq 95\%$ |
|----------------------------------------------------------------------------------|--------------|-----------------------------------------|
| <i>cis</i> - <b>12</b>                                                           | 17           | 4                                       |
| TS1 <sub>pro S</sub> , configuration A from <i>cis</i> - <b>12</b> and <b>10</b> | 4            | 1                                       |
| ( <i>S</i> )-hemiaminal from <i>cis</i> - <b>12</b> and <b>10</b>                | 89           | 4                                       |
| TS2 from ( <i>S</i> )-hemiaminal from <i>cis</i> - <b>12</b> and <b>10</b>       | 3            | 2                                       |
| Enamine from <i>cis</i> - <b>12</b>                                              | 9            | 2                                       |
| TS1 <sub>pro R</sub> , configuration B from <i>cis</i> - <b>12</b> and <b>10</b> | 6            | 1                                       |
| ( <i>R</i> )-hemiaminal from <i>cis</i> - <b>12</b> and <b>10</b>                | 92           | 20                                      |
| TS2 from ( <i>R</i> )-hemiaminal from <i>cis</i> - <b>12</b> and <b>10</b>       | 5            | 2                                       |
| TS1 <sub>pro S</sub> , configuration C from <i>cis</i> - <b>12</b> and <b>10</b> | 4            | 1                                       |
| TS1 <sub>pro R</sub> , configuration D from <i>cis</i> - <b>12</b> and <b>10</b> | 5            | 1                                       |

*cis*-**12** (most abundant conformer; abundance: 68%)

# of imaginary frequencies: 0

Energy: -495.823151 Hartrees

Gibbs Free Energy: -495.675102 Hartrees

|   |           |           |           |
|---|-----------|-----------|-----------|
| C | 0.091668  | -0.956443 | 0.173831  |
| C | 0.956772  | -0.316490 | 1.310128  |
| C | 2.101261  | 0.373770  | 0.548996  |
| C | 2.330455  | -0.626819 | -0.593845 |
| N | 0.982157  | -1.075653 | -1.010138 |
| C | -1.101815 | -0.056113 | -0.154366 |
| H | 0.397309  | 0.381288  | 1.939681  |
| H | 1.354364  | -1.107594 | 1.954316  |
| H | 2.912042  | -1.485664 | -0.231301 |
| H | 2.864845  | -0.185517 | -1.439896 |
| H | 2.990952  | 0.513055  | 1.171095  |
| H | -0.263840 | -1.947079 | 0.480598  |
| O | -0.931451 | 1.030275  | -0.737383 |
| O | 1.736618  | 1.666076  | 0.071364  |
| H | 0.846492  | 1.581462  | -0.335203 |
| N | -2.308709 | -0.490221 | 0.248342  |
| H | -2.371697 | -1.407998 | 0.668201  |
| C | -3.540934 | 0.263960  | 0.066236  |
| H | -4.133252 | -0.139690 | -0.762683 |
| H | -4.137746 | 0.223697  | 0.981238  |
| H | -3.280808 | 1.299312  | -0.154529 |
| H | 0.641429  | -0.426165 | -1.716672 |

TS1<sub>pro S</sub>, configuration A from *cis*-**12** and **10** (most abundant conformer; abundance: 98%)

# of imaginary frequencies: 1

Energy: -882.118016 Hartrees

Gibbs Free Energy: -881.809314 Hartrees

|   |           |           |           |
|---|-----------|-----------|-----------|
| N | 0.189674  | -0.733275 | 0.274840  |
| C | 0.435287  | -2.133789 | -0.218760 |
| C | 1.935510  | -2.179420 | -0.542836 |
| C | 2.527381  | -1.323160 | 0.589182  |
| C | 1.514702  | -0.179913 | 0.786163  |
| C | 1.879605  | 1.081484  | -0.016132 |
| N | 1.553209  | 2.243458  | 0.569084  |
| C | 1.736705  | 3.528119  | -0.093206 |
| O | 2.451748  | 1.001405  | -1.115357 |
| O | 2.222435  | -1.675166 | -1.835223 |
| H | 2.350558  | -0.702624 | -1.752438 |
| H | 2.296580  | -3.211757 | -0.507693 |
| H | 3.526324  | -0.955207 | 0.346171  |
| H | 2.592998  | -1.913757 | 1.507872  |
| H | 1.387330  | 0.081855  | 1.834558  |
| H | -0.188154 | -0.103113 | -0.512029 |
| H | -0.184546 | -2.330914 | -1.093241 |
| H | 0.184787  | -2.840489 | 0.575703  |
| H | 0.903683  | 2.187233  | 1.347254  |
| H | 2.700105  | 3.533859  | -0.605672 |
| H | 1.721590  | 4.318203  | 0.659506  |
| H | 0.945115  | 3.714747  | -0.828460 |
| C | -2.769115 | -0.577419 | -2.045173 |
| C | -2.520003 | 0.189125  | -0.737263 |
| C | -2.298480 | -0.823189 | 0.460889  |
| C | -1.040700 | -0.452339 | 1.276630  |
| C | -0.883939 | -1.246499 | 2.563489  |
| C | -3.734916 | 1.086776  | -0.431474 |
| O | -0.984415 | 0.905182  | 1.500102  |
| O | -1.364900 | 1.004267  | -0.878436 |
| H | -1.169002 | 1.238709  | 0.438723  |
| H | -1.907912 | -1.205861 | -2.302893 |

|   |           |           |           |
|---|-----------|-----------|-----------|
| H | -2.924169 | 0.130140  | -2.867874 |
| H | -3.651930 | -1.225357 | -1.974713 |
| H | -3.867349 | 1.819749  | -1.235808 |
| H | -3.576119 | 1.631108  | 0.506423  |
| H | -4.660609 | 0.504742  | -0.335923 |
| H | -2.235664 | -1.860259 | 0.111698  |
| H | -3.141787 | -0.785538 | 1.159095  |
| H | -0.939103 | -2.326183 | 2.398510  |
| H | 0.051999  | -1.009899 | 3.078440  |
| H | -1.706085 | -0.964835 | 3.227591  |

(S)-hemiaminal from *cis*-**12** and **10** (most abundant conformer; abundance: 74%)

# of imaginary frequencies: 0

Energy: -882.145144 Hartrees

Gibbs Free Energy: -881.832833 Hartrees

|   |           |           |           |
|---|-----------|-----------|-----------|
| C | 1.477493  | -0.528226 | 0.666602  |
| C | 2.231935  | -1.755829 | 0.072675  |
| C | 1.168143  | -2.451259 | -0.792229 |
| C | -0.079552 | -2.247188 | 0.071938  |
| N | 0.056034  | -0.838629 | 0.458654  |
| C | 1.851335  | 0.738885  | -0.115654 |
| H | 2.546092  | -2.417890 | 0.885700  |
| H | 3.120480  | -1.482466 | -0.503516 |
| H | -1.000221 | -2.421424 | -0.490839 |
| H | -0.063974 | -2.945915 | 0.926853  |
| H | 1.388247  | -3.508556 | -0.963528 |
| H | 1.735959  | -0.392166 | 1.724573  |
| C | -0.916703 | -0.239726 | 1.397359  |
| C | -2.312825 | -0.151684 | 0.731276  |
| H | -2.715032 | -1.159365 | 0.577357  |
| H | -2.960424 | 0.322513  | 1.478006  |
| O | -0.465779 | 1.069950  | 1.726949  |
| O | 1.395857  | 0.941886  | -1.260617 |
| O | 1.038758  | -1.850450 | -2.078478 |
| H | 1.007723  | -0.880485 | -1.932953 |
| N | 2.740320  | 1.559396  | 0.464005  |
| H | 3.015360  | 1.364018  | 1.417754  |
| C | 3.251756  | 2.772860  | -0.157779 |
| H | 2.723396  | 3.660282  | 0.209204  |
| H | 3.109117  | 2.696129  | -1.235836 |
| H | 4.316734  | 2.876912  | 0.064320  |
| C | -1.003591 | -0.997955 | 2.730939  |
| H | -0.019051 | -1.034659 | 3.210079  |
| H | -1.692560 | -0.484929 | 3.408817  |
| H | -1.358827 | -2.022986 | 2.589163  |
| C | -2.419354 | 0.651488  | -0.611236 |
| C | -2.390925 | -0.255025 | -1.849519 |
| H | -3.201385 | -0.991791 | -1.813004 |
| H | -2.520531 | 0.350541  | -2.753670 |
| H | -1.442039 | -0.792532 | -1.932542 |
| C | -3.712484 | 1.472766  | -0.597518 |
| H | -3.695373 | 2.198245  | 0.223559  |
| H | -3.831672 | 2.018239  | -1.539832 |
| H | -4.582132 | 0.820948  | -0.459537 |
| O | -1.353831 | 1.631056  | -0.732290 |
| H | -0.707107 | 1.620875  | 0.948699  |
| H | -0.538665 | 1.166920  | -1.023077 |

TS2 from (S)-hemiaminal from *cis*-**12** and **10** (most abundant conformer; abundance: 66%)

# of imaginary frequencies: 1

Energy: -882.096822 Hartrees

Gibbs Free Energy: -881.789730 Hartrees

|   |           |           |           |
|---|-----------|-----------|-----------|
| N | 0.898766  | -0.942765 | -0.169175 |
| C | 2.114027  | -1.791509 | -0.151646 |
| C | 3.224919  | -0.809847 | 0.241925  |
| C | 2.508731  | 0.056448  | 1.288833  |
| C | 1.083033  | 0.246764  | 0.721118  |
| C | 0.949053  | 1.599306  | 0.010132  |
| N | -0.098248 | 2.326837  | 0.424694  |
| C | -0.345147 | 3.666355  | -0.089981 |
| O | 1.797745  | 1.989189  | -0.811001 |
| O | 3.702825  | -0.064439 | -0.863435 |
| H | 3.082404  | 0.688513  | -1.005446 |
| H | 4.077817  | -1.347603 | 0.665179  |
| H | 3.021858  | 1.005674  | 1.455672  |
| H | 2.453331  | -0.477845 | 2.242028  |
| H | 0.325571  | 0.179116  | 1.497195  |
| H | -0.368469 | -1.945656 | 2.056608  |
| H | 2.282649  | -2.231188 | -1.135840 |
| H | 2.011436  | -2.590907 | 0.593127  |
| H | -0.859095 | 1.802874  | 0.893340  |
| H | 0.573788  | 4.255693  | -0.038626 |
| H | -1.112027 | 4.141698  | 0.524060  |
| H | -0.683045 | 3.648401  | -1.133382 |
| C | -3.256478 | 1.213264  | -0.686386 |
| C | -2.556592 | -0.009140 | -0.060758 |
| C | -1.362449 | -0.402771 | -1.018114 |
| C | -0.289094 | -1.378876 | -0.569651 |
| C | -0.383835 | -2.772958 | -1.118545 |
| C | -3.594137 | -1.155703 | 0.013586  |
| O | -1.143840 | -1.910022 | 1.473080  |
| O | -2.056671 | 0.314790  | 1.207085  |
| H | -1.568705 | -0.833321 | 1.518103  |
| H | -2.574954 | 2.064996  | -0.774961 |
| H | -4.092767 | 1.514729  | -0.045719 |
| H | -3.653015 | 0.991104  | -1.684757 |
| H | -4.410514 | -0.848404 | 0.678111  |
| H | -3.153141 | -2.068446 | 0.419603  |
| H | -4.022515 | -1.377340 | -0.971884 |
| H | -0.859841 | 0.521956  | -1.308409 |
| H | -1.777065 | -0.830790 | -1.938579 |
| H | 0.173782  | -3.495712 | -0.521931 |
| H | 0.007901  | -2.786867 | -2.144882 |
| H | -1.431673 | -3.073318 | -1.156146 |

Enamine from *cis*-**12** (most abundant conformer; abundance: 59%)

# of imaginary frequencies: 0

Energy: -612.540204 Hartrees

Gibbs Free Energy: -612.338545 Hartrees

|   |           |           |           |
|---|-----------|-----------|-----------|
| C | 0.129331  | -0.083982 | 0.836891  |
| C | -0.184587 | -1.524700 | 1.314160  |
| C | -1.179806 | -2.066110 | 0.270237  |
| C | -2.011231 | -0.817855 | -0.059116 |
| N | -1.080713 | 0.298635  | 0.104110  |

|   |           |           |           |
|---|-----------|-----------|-----------|
| C | 1.378604  | -0.073099 | -0.069086 |
| H | -0.666379 | -1.472392 | 2.295982  |
| H | 0.704230  | -2.155220 | 1.401647  |
| H | -2.396738 | -0.865886 | -1.084231 |
| H | -2.873728 | -0.712133 | 0.619496  |
| H | -1.807340 | -2.859656 | 0.685309  |
| H | 0.299538  | 0.572606  | 1.697244  |
| C | -1.498628 | 1.606349  | -0.108805 |
| C | -2.733847 | 1.914333  | -0.566369 |
| H | -2.997001 | 2.950422  | -0.745853 |
| O | 1.393278  | -0.651585 | -1.167765 |
| O | -0.544664 | -2.620802 | -0.872366 |
| H | 0.112385  | -1.953778 | -1.177146 |
| N | 2.460029  | 0.559701  | 0.421823  |
| H | 2.379368  | 1.059658  | 1.296611  |
| C | 3.730725  | 0.614526  | -0.289181 |
| H | 3.926394  | -0.352366 | -0.757535 |
| H | 4.525100  | 0.840782  | 0.423980  |
| H | 3.720686  | 1.384551  | -1.069144 |
| C | -0.493674 | 2.697473  | 0.181326  |
| H | -0.230936 | 2.738595  | 1.245844  |
| H | 0.438648  | 2.555471  | -0.377711 |
| H | -0.908707 | 3.669207  | -0.094671 |
| H | -3.490971 | 1.169269  | -0.780647 |

TS1<sub>pro R</sub>, configuration B from *cis*-**12** and **10** (most abundant conformer; abundance: 100%)

# of imaginary frequencies: 1

Energy: -882.113168 Hartrees

Gibbs Free Energy: -881.803729 Hartrees

|   |           |           |           |
|---|-----------|-----------|-----------|
| N | -0.063201 | 0.555225  | -0.024224 |
| C | 0.271770  | 1.795579  | 0.758092  |
| C | 1.425728  | 2.505851  | -0.005521 |
| C | 1.533405  | 1.712052  | -1.326776 |
| C | 1.080808  | 0.286233  | -0.987298 |
| C | 2.215150  | -0.588621 | -0.417439 |
| N | 2.065536  | -1.906213 | -0.633280 |
| C | 3.025613  | -2.881982 | -0.136268 |
| O | 3.211979  | -0.098447 | 0.138428  |
| O | 2.629252  | 2.531705  | 0.737774  |
| H | 3.010294  | 1.627301  | 0.667418  |
| H | 1.164626  | 3.549873  | -0.195416 |
| H | 2.545013  | 1.748339  | -1.735666 |
| H | 0.847531  | 2.127826  | -2.072161 |
| H | 0.646526  | -0.223559 | -1.846258 |
| H | -0.897454 | 0.706878  | -0.693482 |
| H | 0.607734  | 1.525160  | 1.759607  |
| H | -0.627898 | 2.408066  | 0.836570  |
| H | 1.112302  | -2.210935 | -0.831104 |
| H | 2.927706  | -3.035086 | 0.945966  |
| H | 4.038527  | -2.533759 | -0.346709 |
| H | 2.855477  | -3.831382 | -0.646835 |
| C | -3.753343 | 1.358918  | -0.116558 |
| C | -3.042201 | -0.000878 | -0.183071 |
| C | -2.145891 | -0.213723 | 1.101135  |
| C | -0.726173 | -0.699238 | 0.721721  |
| C | 0.079330  | -1.125083 | 1.942786  |
| C | -4.089681 | -1.126498 | -0.277784 |
| O | -0.796333 | -1.674404 | -0.254175 |

|   |           |           |           |
|---|-----------|-----------|-----------|
| O | -2.208700 | -0.041713 | -1.334653 |
| H | -1.474871 | -1.118249 | -0.967999 |
| H | -4.399882 | 1.436389  | 0.766633  |
| H | -3.025499 | 2.178957  | -0.075998 |
| H | -4.370751 | 1.502223  | -1.010948 |
| H | -4.774354 | -1.120511 | 0.579972  |
| H | -3.593343 | -2.102904 | -0.311077 |
| H | -4.680106 | -1.008989 | -1.193900 |
| H | -2.082009 | 0.697756  | 1.707527  |
| H | -2.573057 | -0.985355 | 1.750894  |
| H | -0.024655 | -0.407744 | 2.761762  |
| H | 1.141275  | -1.263599 | 1.734574  |
| H | -0.326148 | -2.082564 | 2.282067  |

(*R*)-hemiaminal from *cis*-**12** and **10** (most abundant conformer; abundance: 19%)

# of imaginary frequencies: 0

Energy: -882.138566 Hartrees

Gibbs Free Energy: -881.827984 Hartrees

|   |           |           |           |
|---|-----------|-----------|-----------|
| C | -1.125768 | -0.139998 | -0.755009 |
| C | -1.608788 | -1.465092 | -1.365583 |
| C | -1.945473 | -2.328917 | -0.139586 |
| C | -0.841064 | -1.917432 | 0.853037  |
| N | -0.556358 | -0.493453 | 0.569204  |
| C | -2.279769 | 0.860334  | -0.521075 |
| H | -0.786657 | -1.923927 | -1.925358 |
| H | -2.460958 | -1.347025 | -2.039008 |
| H | -1.180707 | -2.062308 | 1.884140  |
| H | 0.041913  | -2.556440 | 0.696076  |
| H | -1.879819 | -3.400496 | -0.357218 |
| H | -0.374653 | 0.345953  | -1.387119 |
| C | 0.809776  | 0.000432  | 0.850038  |
| C | 1.882203  | -0.725091 | -0.034986 |
| H | 2.175010  | -1.653024 | 0.466399  |
| H | 1.406698  | -1.019475 | -0.977972 |
| O | 0.806785  | 1.410735  | 0.585763  |
| O | -3.477444 | 0.524552  | -0.582727 |
| O | -3.258446 | -2.094489 | 0.358290  |
| H | -3.505285 | -1.181792 | 0.091105  |
| N | -1.889719 | 2.113365  | -0.227582 |
| H | -0.907195 | 2.213506  | 0.026644  |
| C | -2.834555 | 3.143030  | 0.177073  |
| H | -2.345231 | 4.117231  | 0.113593  |
| H | -3.192785 | 2.991584  | 1.203680  |
| H | -3.697359 | 3.131674  | -0.492389 |
| C | 1.072264  | -0.186565 | 2.350135  |
| H | 0.316067  | 0.365635  | 2.916164  |
| H | 1.024125  | -1.240605 | 2.639670  |
| H | 2.059259  | 0.194535  | 2.620144  |
| C | 3.172226  | 0.025563  | -0.437415 |
| C | 3.984521  | 0.587210  | 0.735550  |
| H | 3.413688  | 1.336771  | 1.289177  |
| H | 4.280217  | -0.210152 | 1.425313  |
| H | 4.901685  | 1.060724  | 0.363821  |
| C | 4.046087  | -0.891071 | -1.303134 |
| H | 4.914262  | -0.340483 | -1.684205 |
| H | 4.415420  | -1.743408 | -0.722424 |
| H | 3.477893  | -1.271545 | -2.158087 |
| O | 2.699621  | 1.129392  | -1.269303 |

|   |          |          |           |
|---|----------|----------|-----------|
| H | 1.431123 | 1.577852 | -0.157082 |
| H | 3.441729 | 1.739882 | -1.416869 |

TS2 from (*R*)-hemiaminal from *cis*-**12** and **10** (most abundant conformer; abundance: 71%)

# of imaginary frequencies: 1

Energy: -882.087485 Hartrees

Gibbs Free Energy: -881.788188 Hartrees

|   |           |           |           |
|---|-----------|-----------|-----------|
| N | -0.250183 | 0.276877  | -0.165944 |
| C | 0.208902  | 1.646982  | -0.491567 |
| C | -0.702215 | 2.542479  | 0.350378  |
| C | -2.029463 | 1.768610  | 0.369191  |
| C | -1.599463 | 0.290313  | 0.451549  |
| C | -2.587755 | -0.609668 | -0.312279 |
| N | -3.590025 | -1.108209 | 0.441629  |
| C | -4.659815 | -1.915192 | -0.130135 |
| O | -2.486188 | -0.793956 | -1.524612 |
| O | -0.773346 | 3.817121  | -0.262870 |
| H | -1.199869 | 4.424711  | 0.361998  |
| H | -0.298888 | 2.621788  | 1.369550  |
| H | -2.548080 | 1.958389  | -0.576964 |
| H | -2.689088 | 2.045931  | 1.194622  |
| H | -1.497565 | -0.029230 | 1.494758  |
| H | 0.753880  | 0.124382  | 2.428409  |
| H | 0.038820  | 1.856400  | -1.554956 |
| H | 1.265977  | 1.738708  | -0.239816 |
| H | -3.583671 | -0.957489 | 1.441127  |
| H | -4.996316 | -1.468789 | -1.068788 |
| H | -5.491949 | -1.945544 | 0.574757  |
| H | -4.324685 | -2.939136 | -0.332013 |
| C | 4.186377  | 0.050482  | -1.284680 |
| C | 3.173123  | -0.408807 | -0.219670 |
| C | 1.810993  | -0.705147 | -0.998708 |
| C | 0.535027  | -0.777760 | -0.205216 |
| C | 0.012944  | -2.133710 | 0.158350  |
| C | 3.690677  | -1.710562 | 0.438281  |
| O | 1.372580  | -0.540538 | 2.085505  |
| O | 2.999314  | 0.599353  | 0.716570  |
| H | 2.213154  | 0.098238  | 1.493590  |
| H | 3.861933  | 0.995533  | -1.735326 |
| H | 4.316620  | -0.690019 | -2.084023 |
| H | 5.160004  | 0.218648  | -0.810086 |
| H | 3.854943  | -2.510942 | -0.294397 |
| H | 2.990161  | -2.064377 | 1.199476  |
| H | 4.646201  | -1.499376 | 0.933713  |
| H | 1.697153  | 0.072778  | -1.758488 |
| H | 1.908933  | -1.660001 | -1.527192 |
| H | -0.674445 | -2.117261 | 1.003508  |
| H | -0.506514 | -2.549952 | -0.714963 |
| H | 0.849868  | -2.788024 | 0.401992  |

TS1<sub>pro S</sub>, configuration C from *cis*-**12** and **10** (most abundant conformer; abundance: 98%)

# of imaginary frequencies: 1

Energy: -882.109260 Hartrees

Gibbs Free Energy: -881.801257 Hartrees

|   |           |           |          |
|---|-----------|-----------|----------|
| N | 0.017260  | -0.711380 | 0.040726 |
| C | -0.686283 | -1.953659 | 0.518798 |

|   |           |           |           |
|---|-----------|-----------|-----------|
| C | -1.783693 | -2.270248 | -0.532536 |
| C | -1.579499 | -1.197526 | -1.632057 |
| C | -0.908534 | -0.005863 | -0.920448 |
| C | -1.942641 | 0.883987  | -0.220159 |
| N | -1.925705 | 2.183443  | -0.560885 |
| C | -2.895202 | 3.135128  | -0.028590 |
| O | -2.769138 | 0.422122  | 0.582060  |
| O | -3.082475 | -2.269513 | 0.031571  |
| H | -3.213935 | -1.358076 | 0.371071  |
| H | -1.642786 | -3.271041 | -0.947287 |
| H | -2.523923 | -0.933058 | -2.113659 |
| H | -0.897504 | -1.569123 | -2.403921 |
| H | -0.295614 | 0.583280  | -1.602959 |
| H | 0.871319  | -1.030232 | -0.520282 |
| H | -1.144814 | -1.767819 | 1.489863  |
| H | 0.056563  | -2.742146 | 0.626723  |
| H | -1.229920 | 2.521149  | -1.211604 |
| H | -2.693940 | 3.353212  | 1.025411  |
| H | -3.904212 | 2.724030  | -0.112975 |
| H | -2.827978 | 4.057892  | -0.605286 |
| C | 2.882601  | 0.809516  | -1.933426 |
| C | 2.871578  | 0.268010  | -0.496542 |
| C | 1.798848  | 1.035582  | 0.377581  |
| C | 0.925964  | 0.047490  | 1.184311  |
| C | 0.050394  | 0.711049  | 2.235201  |
| C | 4.267520  | 0.450989  | 0.130590  |
| O | 1.674386  | -0.962831 | 1.705795  |
| O | 2.552008  | -1.118027 | -0.518607 |
| H | 2.255290  | -1.241069 | 0.745457  |
| H | 1.910705  | 0.657392  | -2.419085 |
| H | 3.636982  | 0.279793  | -2.526715 |
| H | 3.111231  | 1.882281  | -1.961070 |
| H | 5.010610  | -0.116786 | -0.441421 |
| H | 4.268433  | 0.078664  | 1.161149  |
| H | 4.573475  | 1.504929  | 0.147446  |
| H | 1.176093  | 1.701862  | -0.230976 |
| H | 2.293984  | 1.677499  | 1.114806  |
| H | -0.488299 | 1.578632  | 1.847411  |
| H | -0.663632 | 0.009473  | 2.673378  |
| H | 0.716418  | 1.054070  | 3.032747  |

TS1<sub>pro R</sub>, configuration D from *cis*-**12** and **10** (most abundant conformer; abundance: 100%)

# of imaginary frequencies: 1

Energy: -882.114023 Hartrees

Gibbs Free Energy: -881.805675 Hartrees

|   |          |           |           |
|---|----------|-----------|-----------|
| N | 0.145849 | -0.918641 | 0.035523  |
| C | 0.694634 | -2.179590 | -0.590085 |
| C | 2.213684 | -1.982567 | -0.628307 |
| C | 2.470104 | -1.208712 | 0.677120  |
| C | 1.264856 | -0.242288 | 0.799561  |
| C | 1.584383 | 1.116468  | 0.167139  |
| N | 1.777709 | 2.132581  | 1.020837  |
| C | 2.173170 | 3.467166  | 0.584246  |
| O | 1.698653 | 1.229834  | -1.064064 |
| O | 2.658957 | -1.304087 | -1.790189 |
| H | 2.314446 | -0.385154 | -1.748176 |
| H | 2.722297 | -2.950208 | -0.625888 |
| H | 3.429133 | -0.685148 | 0.666885  |



|   |           |           |           |
|---|-----------|-----------|-----------|
| H | 2.467072  | -1.896486 | 1.528260  |
| H | 0.958381  | -0.121522 | 1.837746  |
| H | -0.244690 | -0.313228 | -0.753431 |
| H | 0.261635  | -2.308817 | -1.580688 |
| H | 0.416738  | -3.030354 | 0.033900  |
| H | 1.620457  | 1.982932  | 2.008591  |
| H | 2.743613  | 3.945666  | 1.382042  |
| H | 1.297353  | 4.082016  | 0.349704  |
| H | 2.793019  | 3.380188  | -0.309251 |
| C | -1.924194 | 2.320918  | -0.603223 |
| C | -2.339332 | 0.849189  | -0.448695 |
| C | -1.854951 | 0.283239  | 0.947316  |
| C | -1.281599 | -1.144535 | 0.788682  |
| C | -1.076447 | -1.888419 | 2.099561  |
| C | -3.877186 | 0.747099  | -0.534155 |
| O | -2.009303 | -1.882923 | -0.101109 |
| O | -1.758201 | 0.078165  | -1.485354 |
| H | -2.040415 | -1.135312 | -0.934719 |
| H | -2.316360 | 2.944633  | 0.210509  |
| H | -0.832987 | 2.416783  | -0.616340 |
| H | -2.304522 | 2.715866  | -1.552902 |
| H | -4.373158 | 1.365625  | 0.225342  |
| H | -4.196811 | -0.290945 | -0.391110 |
| H | -4.213865 | 1.077462  | -1.523976 |
| H | -1.117842 | 0.946319  | 1.417067  |
| H | -2.691512 | 0.215744  | 1.651962  |
| H | -0.516587 | -1.306866 | 2.837783  |
| H | -0.577443 | -2.849735 | 1.945346  |
| H | -2.066444 | -2.092769 | 2.517591  |
| H | 2.699306  | -1.831887 | -0.670851 |

Partial Aldol Reaction Cycle with *trans*-4-Hyp-NHMe (*trans*-**12**) as a Catalyst

Table S6. Numbers of conformers of intermediates and transition structures from *trans*-**12**.

|                                                                                    | # conformers | # conformers accounting for $\geq 95\%$ |
|------------------------------------------------------------------------------------|--------------|-----------------------------------------|
| <i>trans</i> - <b>12</b>                                                           | 20           | 4                                       |
| TS1 <sub>pro S</sub> , configuration A from <i>trans</i> - <b>12</b> and <b>10</b> | 6            | 6                                       |
| (S)-hemiaminal from <i>trans</i> - <b>12</b> and <b>10</b>                         | 97           | 10                                      |
| TS2 from (S)-hemiaminal from <i>trans</i> - <b>12</b> and <b>10</b>                | 3            | 3                                       |
| Enamine from <i>trans</i> - <b>12</b>                                              | 6            | 6                                       |
| TS1 <sub>pro R</sub> , configuration B from <i>trans</i> - <b>12</b> and <b>10</b> | 6            | 3                                       |
| (R)-hemiaminal from <i>trans</i> - <b>12</b> and <b>10</b>                         | 94           | 6                                       |
| TS2 from (R)-hemiaminal from <i>trans</i> - <b>12</b> and <b>10</b>                | 4            | 2                                       |
| TS1 <sub>pro S</sub> , configuration C from <i>trans</i> - <b>12</b> and <b>10</b> | 5            | 3                                       |
| TS1 <sub>pro R</sub> , configuration D from <i>trans</i> - <b>12</b> and <b>10</b> | 5            | 2                                       |

*trans*-**12** (most abundant conformer; abundance: 43%)

# of imaginary frequencies: 0

Energy: -495.821304 Hartrees

Gibbs Free Energy: -495.674184 Hartrees

|   |           |           |           |
|---|-----------|-----------|-----------|
| C | -2.187791 | 0.076101  | 0.644519  |
| C | -1.422366 | -1.244580 | 0.532460  |
| N | -0.523976 | -1.079419 | -0.628447 |
| C | -0.111731 | 0.346759  | -0.621879 |
| C | -1.093978 | 1.108531  | 0.324031  |
| C | 1.349980  | 0.538712  | -0.184661 |
| O | -3.207708 | 0.041460  | -0.360495 |
| N | 2.061241  | -0.604142 | -0.097142 |
| O | 1.799339  | 1.669056  | 0.038035  |
| H | -2.630096 | 0.229643  | 1.638527  |
| H | -0.824903 | -1.404519 | 1.438400  |
| H | -2.079739 | -2.106836 | 0.393843  |
| H | -1.073584 | -1.245198 | -1.468394 |
| H | -0.170551 | 0.743192  | -1.640992 |
| H | -0.583625 | 1.422353  | 1.240189  |
| H | -1.508010 | 2.008265  | -0.141067 |
| H | -3.606927 | 0.925020  | -0.402812 |
| H | 1.536386  | -1.447915 | -0.309179 |
| C | 3.461673  | -0.662083 | 0.272518  |
| H | 3.606497  | -1.280814 | 1.165295  |
| H | 3.797849  | 0.354323  | 0.483808  |
| H | 4.068074  | -1.077362 | -0.540752 |

TS1<sub>pro S</sub>, configuration A from *trans*-**12** and **10** (most abundant conformer; abundance: 30%)

# of imaginary frequencies: 1

Energy: -882.110653 Hartrees

Gibbs Free Energy: -881.803691 Hartrees

|   |           |           |           |
|---|-----------|-----------|-----------|
| N | -0.274683 | -0.516290 | 0.008070  |
| C | -0.861397 | -1.413193 | 1.064919  |
| C | -2.393295 | -1.241623 | 0.962696  |
| C | -2.600237 | -0.840551 | -0.498312 |
| C | -1.420088 | 0.087320  | -0.783579 |
| C | -1.746955 | 1.557034  | -0.406580 |
| N | -0.740593 | 2.355839  | 0.002188  |
| C | -1.000510 | 3.755449  | 0.314273  |
| O | -2.905890 | 1.960922  | -0.541445 |
| O | -3.101731 | -2.433351 | 1.253272  |
| H | -3.119019 | -2.548016 | 2.216800  |
| H | -2.722034 | -0.426241 | 1.620817  |
| H | -3.548499 | -0.333518 | -0.674565 |
| H | -2.550954 | -1.737228 | -1.125066 |
| H | -1.108847 | 0.096097  | -1.831004 |
| H | 0.294885  | 0.246599  | 0.427527  |
| H | -0.449380 | -1.148738 | 2.040043  |
| H | -0.609718 | -2.450393 | 0.840726  |
| H | 0.225729  | 2.023848  | 0.081213  |
| H | -0.076015 | 4.202951  | 0.682774  |
| H | -1.774900 | 3.845496  | 1.082649  |
| H | -1.335447 | 4.303683  | -0.573156 |
| C | 2.787129  | 0.159671  | 2.044817  |
| C | 2.695400  | 0.111516  | 0.512856  |
| C | 2.114434  | -1.286612 | 0.040443  |
| C | 0.944247  | -1.113461 | -0.951417 |
| C | 0.480680  | -2.393552 | -1.626736 |
| C | 4.094545  | 0.315386  | -0.097063 |
| O | 1.184303  | -0.127824 | -1.853305 |
| O | 1.842890  | 1.156210  | 0.057877  |
| H | 1.562468  | 0.668620  | -1.135660 |

|   |           |           |           |
|---|-----------|-----------|-----------|
| H | 1.797839  | 0.035608  | 2.502632  |
| H | 3.186158  | 1.128834  | 2.365313  |
| H | 3.440503  | -0.630397 | 2.435057  |
| H | 4.487716  | 1.296357  | 0.193314  |
| H | 4.037010  | 0.278631  | -1.190954 |
| H | 4.801490  | -0.455652 | 0.234566  |
| H | 1.807530  | -1.904999 | 0.892114  |
| H | 2.883806  | -1.858821 | -0.489584 |
| H | 0.277746  | -3.204599 | -0.922684 |
| H | -0.406517 | -2.215384 | -2.242003 |
| H | 1.285095  | -2.721549 | -2.291784 |

(S)-hemiaminal from *trans*-**12** and **10** (most abundant conformer; abundance: 64%)

# of imaginary frequencies: 0

Energy: -882.139947 Hartrees

Gibbs Free Energy: -881.829120 Hartrees

|   |           |           |           |
|---|-----------|-----------|-----------|
| C | 1.220013  | -0.046075 | -0.622325 |
| C | 2.033632  | 1.136423  | -1.239662 |
| C | 1.981979  | 2.256583  | -0.183336 |
| C | 1.598801  | 1.500026  | 1.089919  |
| N | 0.675729  | 0.422008  | 0.675636  |
| C | 2.098642  | -1.304924 | -0.482361 |
| H | 1.603323  | 1.471218  | -2.188269 |
| H | 3.063378  | 0.830007  | -1.439768 |
| H | 2.502888  | 1.036541  | 1.504991  |
| H | 1.176230  | 2.145470  | 1.858452  |
| H | 2.933785  | 2.789542  | -0.082432 |
| H | 0.397866  | -0.325004 | -1.285859 |
| C | -0.782773 | 0.678885  | 0.674992  |
| C | -1.504597 | -0.701515 | 0.564341  |
| H | -0.802007 | -1.436757 | 0.162946  |
| H | -1.735649 | -1.034607 | 1.583224  |
| O | -1.189854 | 1.484623  | -0.452464 |
| O | 2.786336  | -1.699144 | -1.430188 |
| O | 0.935629  | 3.218327  | -0.439210 |
| H | 1.111112  | 3.637055  | -1.298212 |
| N | 2.017449  | -1.924160 | 0.714404  |
| H | 1.434578  | -1.458390 | 1.402620  |
| C | 2.742731  | -3.134948 | 1.049715  |
| H | 3.275586  | -3.466886 | 0.157379  |
| H | 2.054840  | -3.923747 | 1.372685  |
| H | 3.466863  | -2.952546 | 1.852041  |
| C | -1.204650 | 1.398692  | 1.965119  |
| H | -2.294469 | 1.389777  | 2.038822  |
| H | -0.794815 | 0.899745  | 2.849227  |
| H | -0.884394 | 2.444630  | 1.966940  |
| C | -2.780902 | -0.809940 | -0.309990 |
| C | -3.254676 | -2.268257 | -0.304100 |
| H | -3.557641 | -2.582083 | 0.700590  |
| H | -4.113608 | -2.383231 | -0.974637 |
| H | -2.458015 | -2.935208 | -0.651722 |
| C | -3.926441 | 0.108267  | 0.150673  |
| H | -3.639610 | 1.160413  | 0.075689  |
| H | -4.215508 | -0.101235 | 1.187621  |
| H | -4.803588 | -0.053840 | -0.485978 |
| O | -2.446260 | -0.519694 | -1.680129 |
| H | -0.575325 | 2.254386  | -0.499336 |
| H | -2.015420 | 0.357616  | -1.639268 |

TS2 from (S)-hemiaminal from *trans*-**12** and **10** (most abundant conformer; abundance: 47%)

# of imaginary frequencies: 1

Energy: -882.090137 Hartrees

Gibbs Free Energy: -881.785931 Hartrees

|   |           |           |           |
|---|-----------|-----------|-----------|
| N | 0.527217  | 0.688742  | 0.647907  |
| C | 1.263773  | 1.940702  | 0.940732  |
| C | 1.638647  | 2.467758  | -0.440025 |
| C | 1.958387  | 1.188661  | -1.225399 |
| C | 1.043450  | 0.087507  | -0.621073 |
| C | 1.840595  | -1.213900 | -0.468344 |
| N | 2.225758  | -1.568908 | 0.778702  |
| C | 3.030717  | -2.748141 | 1.059929  |
| O | 2.126542  | -1.844475 | -1.488340 |
| O | 0.488427  | 3.155670  | -0.939902 |
| H | 0.631052  | 3.356230  | -1.879176 |
| H | 2.495427  | 3.149309  | -0.392092 |
| H | 3.014066  | 0.935338  | -1.086088 |
| H | 1.788397  | 1.308293  | -2.298331 |
| H | 0.173137  | -0.118865 | -1.255092 |
| H | -1.227194 | 2.369509  | -0.397703 |
| H | 2.160413  | 1.711783  | 1.525774  |
| H | 0.651320  | 2.647628  | 1.495516  |
| H | 1.935850  | -0.991656 | 1.556275  |
| H | 3.206594  | -3.266623 | 0.117308  |
| H | 2.507055  | -3.417416 | 1.749859  |
| H | 3.992270  | -2.465348 | 1.501247  |
| C | -2.251093 | -2.521351 | -0.916933 |
| C | -2.297817 | -1.052260 | -0.443023 |
| C | -1.264485 | -0.963553 | 0.790050  |
| C | -0.661154 | 0.369620  | 1.153870  |
| C | -1.137424 | 1.007459  | 2.427915  |
| C | -3.724416 | -0.745254 | 0.082775  |
| O | -1.958646 | 1.804803  | -0.082301 |
| O | -1.940971 | -0.208487 | -1.468836 |
| H | -1.993072 | 0.987281  | -0.813682 |
| H | -1.262524 | -2.750427 | -1.332519 |
| H | -2.993796 | -2.670424 | -1.709686 |
| H | -2.463382 | -3.234795 | -0.109640 |
| H | -4.431061 | -0.820963 | -0.752892 |
| H | -3.781540 | 0.272609  | 0.479882  |
| H | -4.043876 | -1.445150 | 0.866083  |
| H | -0.444802 | -1.649438 | 0.566316  |
| H | -1.757288 | -1.347902 | 1.688796  |
| H | -0.979007 | 2.084178  | 2.465774  |
| H | -0.604286 | 0.544738  | 3.270123  |
| H | -2.202469 | 0.809684  | 2.549879  |

Enamine from *trans*-**12** (most abundant conformer; abundance: 26%)

# of imaginary frequencies: 0

Energy: -612.534846 Hartrees

Gibbs Free Energy: -612.333686 Hartrees

|   |           |           |           |
|---|-----------|-----------|-----------|
| C | -0.122769 | -0.311042 | -0.890360 |
| C | 0.749484  | -1.588521 | -0.879111 |
| C | 1.590718  | -1.451547 | 0.399015  |
| C | 1.854173  | 0.060181  | 0.460783  |

|   |           |           |           |
|---|-----------|-----------|-----------|
| N | 0.594721  | 0.636771  | -0.024805 |
| C | -1.563355 | -0.616427 | -0.434602 |
| H | 1.418832  | -1.583712 | -1.748273 |
| H | 0.156678  | -2.505411 | -0.917339 |
| H | 2.090763  | 0.400954  | 1.472066  |
| H | 2.708763  | 0.307321  | -0.192259 |
| H | 1.001480  | -1.755326 | 1.270376  |
| H | -0.211918 | 0.078537  | -1.911932 |
| C | 0.431574  | 2.015719  | -0.209819 |
| C | -0.522265 | 2.553453  | -0.998655 |
| H | -0.622284 | 3.631079  | -1.060001 |
| O | -2.344086 | -1.180551 | -1.207214 |
| O | 2.759025  | -2.251066 | 0.445132  |
| H | 3.302066  | -2.029050 | -0.329878 |
| N | -1.857488 | -0.279667 | 0.839326  |
| H | -1.146007 | 0.236067  | 1.342923  |
| C | -3.162927 | -0.480010 | 1.442152  |
| H | -3.699061 | 0.469424  | 1.559251  |
| H | -3.060740 | -0.948744 | 2.425789  |
| H | -3.740699 | -1.134694 | 0.788310  |
| C | 1.366313  | 2.893505  | 0.588913  |
| H | 1.278315  | 2.694752  | 1.664280  |
| H | 2.415488  | 2.728966  | 0.315401  |
| H | 1.133001  | 3.946452  | 0.416680  |
| H | -1.230489 | 1.964732  | -1.570291 |

TS1<sub>pro R</sub>, configuration B from *trans*-**12** and **10** (most abundant conformer; abundance: 50%)

# of imaginary frequencies: 1

Energy: -882.108132 Hartrees

Gibbs Free Energy: -881.799278 Hartrees

|   |           |           |           |
|---|-----------|-----------|-----------|
| C | 1.226669  | 0.689365  | -0.716173 |
| C | 1.427624  | 2.223498  | -0.684839 |
| C | 0.401712  | 2.787769  | 0.312174  |
| C | 0.081237  | 1.581037  | 1.197401  |
| N | 0.025720  | 0.471763  | 0.201150  |
| C | 2.514653  | -0.059080 | -0.284723 |
| H | 1.280804  | 2.672204  | -1.669214 |
| H | 2.441211  | 2.437742  | -0.342464 |
| H | 0.888141  | 1.382783  | 1.908121  |
| H | -0.864952 | 1.668894  | 1.731793  |
| H | 0.804148  | 3.621453  | 0.898001  |
| H | 0.922203  | 0.328267  | -1.697825 |
| C | -0.348968 | -0.999985 | 0.666968  |
| C | -1.850103 | -0.929765 | 1.038163  |
| H | -2.097508 | -1.904597 | 1.472166  |
| H | -2.014903 | -0.192343 | 1.831992  |
| O | -0.187744 | -1.778611 | -0.468863 |
| O | 3.394627  | 0.494974  | 0.378662  |
| O | -0.747989 | 3.195353  | -0.430682 |
| H | -1.361840 | 3.633259  | 0.181451  |
| N | 2.610473  | -1.320915 | -0.756724 |
| H | 1.724774  | -1.758865 | -1.013447 |
| C | 3.733323  | -2.176242 | -0.401952 |
| H | 3.742686  | -3.039427 | -1.070273 |
| H | 3.670893  | -2.530622 | 0.635607  |
| H | 4.665470  | -1.619610 | -0.518703 |
| H | -0.812111 | 0.582349  | -0.475462 |
| C | 0.510859  | -1.457410 | 1.837189  |

|   |           |           |           |
|---|-----------|-----------|-----------|
| H | 1.580941  | -1.376004 | 1.640893  |
| H | 0.277295  | -0.890869 | 2.743664  |
| H | 0.280801  | -2.509661 | 2.027432  |
| C | -2.747786 | -0.637218 | -0.233223 |
| C | -3.565371 | -1.895143 | -0.584382 |
| H | -2.894946 | -2.740884 | -0.776206 |
| H | -4.249269 | -2.179268 | 0.225960  |
| H | -4.156623 | -1.713552 | -1.489528 |
| C | -3.703153 | 0.533792  | 0.050494  |
| H | -4.354088 | 0.333195  | 0.911002  |
| H | -3.138870 | 1.452028  | 0.253533  |
| H | -4.335712 | 0.718652  | -0.825662 |
| O | -1.907939 | -0.301877 | -1.325400 |
| H | -0.943709 | -1.273482 | -1.106116 |

(*R*)-hemiaminal from *trans*-**12** and **10** (most abundant conformer; abundance: 48%)

# of imaginary frequencies: 0

Energy: -882.138541 Hartrees

Gibbs Free Energy: -881.828119 Hartrees

|   |           |           |           |
|---|-----------|-----------|-----------|
| C | -1.768022 | 0.499292  | 0.403448  |
| C | -2.273912 | 1.852647  | -0.158680 |
| C | -0.993693 | 2.512888  | -0.684974 |
| C | -0.273776 | 1.308002  | -1.299615 |
| N | -0.550520 | 0.161249  | -0.385307 |
| C | -2.877047 | -0.556732 | 0.335155  |
| H | -2.777061 | 2.452719  | 0.602635  |
| H | -2.973165 | 1.688675  | -0.987710 |
| H | -0.678360 | 1.092537  | -2.296498 |
| H | 0.794890  | 1.497700  | -1.402022 |
| H | -1.206286 | 3.288864  | -1.427703 |
| H | -1.524775 | 0.634767  | 1.461443  |
| C | 0.589824  | -0.320152 | 0.392215  |
| C | 1.698886  | -0.861381 | -0.573893 |
| H | 1.553574  | -1.944482 | -0.645170 |
| H | 1.545578  | -0.474850 | -1.584131 |
| O | 1.068129  | 0.788875  | 1.199423  |
| O | -3.843261 | -0.497285 | 1.103780  |
| O | -0.232642 | 3.130552  | 0.347662  |
| H | 0.277484  | 2.422021  | 0.794943  |
| N | -2.727078 | -1.476815 | -0.641720 |
| H | -1.856548 | -1.417433 | -1.159588 |
| C | -3.684113 | -2.531233 | -0.916873 |
| H | -4.054833 | -2.465428 | -1.945919 |
| H | -4.521573 | -2.413789 | -0.227251 |
| H | -3.235164 | -3.520141 | -0.770064 |
| C | 0.175655  | -1.454277 | 1.346032  |
| H | -0.518275 | -1.103328 | 2.113847  |
| H | -0.289675 | -2.278897 | 0.797958  |
| H | 1.070045  | -1.834180 | 1.846724  |
| C | 3.179579  | -0.587959 | -0.203169 |
| C | 4.076535  | -1.649677 | -0.851440 |
| H | 3.817754  | -2.646265 | -0.479517 |
| H | 3.962629  | -1.645096 | -1.941173 |
| H | 5.132004  | -1.456997 | -0.623998 |
| C | 3.634317  | 0.819506  | -0.620395 |
| H | 3.596784  | 0.929306  | -1.709830 |
| H | 3.001217  | 1.588468  | -0.171070 |
| H | 4.670857  | 0.993902  | -0.305614 |

|   |          |           |          |
|---|----------|-----------|----------|
| O | 3.275035 | -0.715797 | 1.243739 |
| H | 1.922779 | 0.496099  | 1.583986 |
| H | 4.189825 | -0.511503 | 1.501206 |

TS2 from (*R*)-hemiaminal from *trans*-**12** and **10**  
(most abundant conformer; abundance: 92%)

# of imaginary frequencies: 1

Energy: -882.095282 Hartrees

Gibbs Free Energy: -881.792582 Hartrees

|   |           |           |           |
|---|-----------|-----------|-----------|
| N | -0.318067 | 0.079597  | -0.344125 |
| C | 0.123244  | 1.280954  | -1.081667 |
| C | -0.231695 | 2.401455  | -0.109565 |
| C | -1.628197 | 1.965142  | 0.363851  |
| C | -1.570205 | 0.406611  | 0.380633  |
| C | -2.786828 | -0.202725 | -0.331746 |
| N | -3.798240 | -0.578118 | 0.479899  |
| C | -5.054327 | -1.100434 | -0.041416 |
| O | -2.834122 | -0.281566 | -1.560075 |
| O | 0.669348  | 2.423626  | 0.986977  |
| H | 1.485399  | 1.922879  | 0.726512  |
| H | -0.261402 | 3.377327  | -0.612060 |
| H | -2.386063 | 2.311417  | -0.345760 |
| H | -1.864877 | 2.368241  | 1.350481  |
| H | -1.483411 | 0.034176  | 1.403194  |
| H | 0.582985  | 0.112196  | 2.257354  |
| H | -0.466636 | 1.352225  | -2.001870 |
| H | 1.180371  | 1.243420  | -1.320423 |
| H | -3.678864 | -0.522966 | 1.481885  |
| H | -4.938040 | -2.125947 | -0.410098 |
| H | -5.404015 | -0.473877 | -0.865905 |
| H | -5.796290 | -1.092028 | 0.758365  |
| C | 3.814607  | 0.147021  | -1.496254 |
| C | 3.030998  | -0.397854 | -0.290685 |
| C | 1.725147  | -1.155577 | -0.840764 |
| C | 0.422293  | -0.987866 | -0.086476 |
| C | -0.237721 | -2.236682 | 0.427044  |
| C | 3.903794  | -1.435336 | 0.451839  |
| O | 1.201485  | -0.577935 | 1.964263  |
| O | 2.719741  | 0.653297  | 0.580477  |
| H | 2.019593  | 0.075190  | 1.397772  |
| H | 3.240492  | 0.915151  | -2.027547 |
| H | 4.065465  | -0.646542 | -2.210726 |
| H | 4.747102  | 0.605980  | -1.149381 |
| H | 4.221316  | -2.252606 | -0.207599 |
| H | 3.354278  | -1.864503 | 1.295848  |
| H | 4.798828  | -0.938664 | 0.843292  |
| H | 1.540167  | -0.839272 | -1.872665 |
| H | 1.939221  | -2.226182 | -0.887078 |
| H | -1.032532 | -2.045360 | 1.148012  |
| H | -0.672985 | -2.764150 | -0.433897 |
| H | 0.505765  | -2.884082 | 0.889974  |

TS1<sub>pro S</sub>, configuration C from *trans*-**12** and **10** (most abundant conformer; abundance: 66%)

# of imaginary frequencies: 1

Energy: -882.104131 Hartrees

Gibbs Free Energy: -881.797866 Hartrees

|   |          |          |          |
|---|----------|----------|----------|
| N | 0.069493 | 0.679011 | 0.309916 |
|---|----------|----------|----------|

|   |           |           |           |
|---|-----------|-----------|-----------|
| C | 0.590587  | 1.890908  | 1.014506  |
| C | 1.095116  | 2.743908  | -0.149871 |
| C | 1.754839  | 1.713400  | -1.083416 |
| C | 1.120126  | 0.334053  | -0.727381 |
| C | 2.198392  | -0.614426 | -0.185749 |
| N | 2.322013  | -1.784890 | -0.851477 |
| C | 3.344394  | -2.774802 | -0.540474 |
| O | 2.904842  | -0.288736 | 0.771268  |
| O | 0.013430  | 3.333307  | -0.872137 |
| H | -0.422604 | 3.974247  | -0.286591 |
| H | 1.803550  | 3.509050  | 0.188484  |
| H | 2.832278  | 1.684165  | -0.911881 |
| H | 1.574351  | 1.980721  | -2.126396 |
| H | 0.601099  | -0.104617 | -1.579441 |
| H | -0.804540 | 0.972500  | -0.232508 |
| H | 1.413307  | 1.592703  | 1.666496  |
| H | -0.211173 | 2.342394  | 1.596824  |
| H | 1.739446  | -1.950378 | -1.661247 |
| H | 3.781088  | -2.520598 | 0.425214  |
| H | 4.132334  | -2.778554 | -1.301736 |
| H | 2.895501  | -3.770377 | -0.487825 |
| C | -2.352899 | -1.039594 | -2.083858 |
| C | -2.512686 | -0.722575 | -0.588659 |
| C | -1.348358 | -1.396901 | 0.246560  |
| C | -0.726822 | -0.398436 | 1.248093  |
| C | 0.191754  | -1.034380 | 2.279016  |
| C | -3.869849 | -1.267728 | -0.097934 |
| O | -1.689414 | 0.364488  | 1.847701  |
| O | -2.480783 | 0.681714  | -0.395763 |
| H | -2.265759 | 0.664003  | 0.916453  |
| H | -1.413763 | -0.629510 | -2.475244 |
| H | -3.173966 | -0.585678 | -2.650978 |
| H | -2.356800 | -2.120320 | -2.274473 |
| H | -4.685936 | -0.772043 | -0.636857 |
| H | -3.991333 | -1.064431 | 0.972088  |
| H | -3.959128 | -2.350927 | -0.252506 |
| H | -0.575624 | -1.828847 | -0.399734 |
| H | -1.738431 | -2.227992 | 0.845127  |
| H | 0.941370  | -1.691543 | 1.835650  |
| H | 0.693464  | -0.277020 | 2.886956  |
| H | -0.441436 | -1.632538 | 2.941500  |

TS1<sub>pro R</sub>, configuration D from *trans*-**12** and **10** (most abundant conformer; abundance: 50%)

# of imaginary frequencies: 1

Energy: -882.108924 Hartrees

Gibbs Free Energy: -881.800829 Hartrees

|   |           |           |           |
|---|-----------|-----------|-----------|
| C | 1.467172  | -1.547066 | -1.085765 |
| C | 2.884717  | -1.089377 | -0.772198 |
| C | 2.713170  | 0.419508  | -0.581402 |
| C | 1.371074  | 0.549435  | 0.166581  |
| N | 0.540443  | -0.611543 | -0.333751 |
| H | 3.565410  | -1.323977 | -1.600015 |
| H | 1.524783  | 0.413098  | 1.237137  |
| H | 3.535326  | 0.880969  | -0.027292 |
| H | 1.252417  | -1.443006 | -2.151351 |
| C | -0.427390 | -1.385279 | 0.720280  |
| C | -1.569593 | -0.385850 | 1.008504  |
| H | -2.104112 | -0.757238 | 1.890810  |

|   |           |           |           |
|---|-----------|-----------|-----------|
| H | -1.157392 | 0.589737  | 1.293831  |
| O | -0.884037 | -2.472311 | 0.013780  |
| H | -0.244171 | -0.316903 | -1.001700 |
| C | 0.353675  | -1.821406 | 1.949205  |
| H | 1.273778  | -2.344126 | 1.677188  |
| H | 0.603911  | -0.979975 | 2.602370  |
| H | -0.285905 | -2.504346 | 2.515976  |
| C | -2.541570 | -0.268465 | -0.234442 |
| C | -3.797523 | -1.133067 | 0.020005  |
| H | -3.514770 | -2.174489 | 0.208256  |
| H | -4.376235 | -0.775318 | 0.882091  |
| H | -4.445163 | -1.107472 | -0.864513 |
| C | -2.981716 | 1.193160  | -0.428445 |
| H | -2.122266 | 1.824098  | -0.675003 |
| H | -3.696810 | 1.257151  | -1.258154 |
| H | -3.466326 | 1.596919  | 0.470745  |
| O | -1.871409 | -0.735145 | -1.387078 |
| H | -1.411367 | -1.944576 | -0.774955 |
| O | 3.300928  | -1.745740 | 0.423621  |
| H | 4.180786  | -1.408220 | 0.658205  |
| H | 2.633950  | 0.908670  | -1.558108 |
| C | 0.715065  | 1.896241  | -0.151204 |
| O | 0.296480  | 2.139309  | -1.285216 |
| N | 0.701027  | 2.789876  | 0.858496  |
| H | 1.028786  | 2.511100  | 1.773047  |
| C | 0.198492  | 4.146633  | 0.683961  |
| H | 0.545433  | 4.758704  | 1.517591  |
| H | -0.896713 | 4.164977  | 0.657563  |
| H | 0.575619  | 4.562132  | -0.253615 |
| H | 1.261607  | -2.571940 | -0.784663 |
